# Supplementary material
Source: publisher figshare collection journal article supplement (https://acs.figshare.com/ndownloader/files/4182910)

# Absolute Configuration and Total Synthesis of a Novel Antimalarial Lipopeptide by the De Novo Preparation of Chiral Nonproteinogenic Amino Acids

Shibaji K. Ghosh,<sup>†</sup> Brinda Somanadhan,<sup>‡</sup> Kevin S.-W. Tan<sup>§</sup>, Mark S. Butler<sup>†,‡</sup>, Martin J. Lear<sup>†,\*</sup>

<sup>†</sup>*Department of Chemistry, Faculty of Science, and Medicinal Chemistry Program of the Life Sciences Institute, National University of Singapore, 3 Science Drive 3, Singapore 117543*

<sup>‡</sup>*MerLion Pharmaceuticals, The Capricorn #05-01, Singapore Science Park II, Singapore 117528*

<sup>§</sup>*Department of Microbiology, National University of Singapore, 5 Science Drive 2, Singapore 117597*

*Martin.Lear@nus.edu.sg*

## SUPPORTING INFORMATION

| Contents                                             | Page  |
|------------------------------------------------------|-------|
| 1. General Procedures and Methods                    | SI-2  |
| 2. Experimental Procedures and Characterization Data | SI-2  |
| 3. <sup>1</sup> H and <sup>13</sup> C NMR Spectra    | SI-12 |

## 1. General Procedures and Methods

Unless stated otherwise, all non-aqueous reactions were performed in flame-dried round bottom flasks under an inert argon atmosphere with freshly distilled dry solvents under anhydrous conditions. Tetrahydrofuran (THF) was distilled over sodium/benzophenone. Dichloromethane ( $\text{CH}_2\text{Cl}_2$ ) was distilled over  $\text{CaH}_2$ . Commercial reagents were purchased from Sigma Aldrich, Fluka, Merck, Alfa Aesar or Strem Chemicals, and used as received without further purification. 4Å molecular sieves were activated by heating in a furnace at 300 °C for 20 h before storing in a dry desiccator, which would be heated at 200 °C under high vacuum for 15-20 min immediately prior to use. Yields refer to chromatographically and spectroscopically homogeneous materials, unless otherwise stated. Reaction progress was monitored by analytical thin layer chromatography (TLC) with 0.25 mm E. Merck pre-coated silica gel plates (60F-254) using UV light (254 nm) as visualizing agent, and ceric ammonium molybdate,  $\text{KMnO}_4$  or ninhydrin as developing stains. Flash chromatography was performed on silica gel 60 (0.040 – 0.063 mm) purchased from SiliCycle or ACME Research Support.  $^1\text{H}$  NMR and  $^{13}\text{C}$  NMR spectra were recorded on Bruker AMX500 (500 MHz) and Bruker ACF300 (300 MHz) NMR spectrometer at ambient atmosphere. 2D NMR was performed on Bruker AMX500 (500 MHz) NMR spectrometer. The deuterated solvents used were  $\text{CDCl}_3$  and  $\text{CD}_3\text{OD}$ . Chemical shifts are reported in parts per million (ppm), and residual undeuterated solvent peaks were used as internal reference: proton ( $\delta$  7.26), carbon ( $\delta$  77.0) for  $\text{CDCl}_3$  and proton ( $\delta$  3.31), carbon ( $\delta$  49.0) for  $\text{CD}_3\text{OD}$ .  $^1\text{H}$  NMR coupling constants ( $J$ ) are reported in Hertz (Hz), and multiplicities are presented as follows: s (singlet), d (doublet), t (triplet), m (multiplet), dd (doublet of doublet), and br (broad). Low resolution mass spectra were obtained on a Finnigan/MAT LCQ spectrometer in ESI mode. High resolution ESI mass spectra were obtained on a Bruker micrOTOF-Q II. Shimadzu LCMS-IT-TOF spectrometer was used for comparing retention time. Mass samples were dissolved in  $\text{CH}_3\text{OH}$  (HPLC Grade), unless otherwise stated. Samples for infra-red measurements were prepared as thin films neat or in  $\text{CH}_2\text{Cl}_2$  solution spread on NaCl cells, and spectra were recorded on a IRPrestige-21 Shimadzu FTIR spectrometer. Optical rotations were recorded on a Jasco DIP-1000 polarimeter with a sodium lamp of wavelength 589 nm. Enantiomeric excess was determined by chiral-phase HPLC analysis on Shimadzu LC-10AT using the indicated chiral column.

## 2. Experimental Procedures and Characterization Data

**(2S,3R)-ethyl 2-(4-methoxyphenylamino)-3,4-dimethylpent-4-enoate (9):** To a solution of

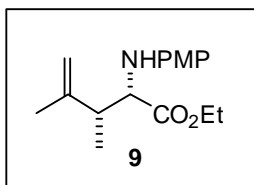

compound **8** (565 mg, 2.02 mmol) in dry THF (10 mL) was added Tebbe reagent (4.45 mL, 2.2 mmol) slowly at -78 °C and the reaction mixture was stirred at that temperature for 2 h and then slowly warmed up to room temperature and allowed to stirred for 12 h. THF (5 mL) was added to the reaction mixture and then 2.5 mL of 5% NaOH solution was added at -15 °C. After stirring for 10 min., it was warmed up to room temperature and filtered through short silica plug and washed with  $\text{Et}_2\text{O}$ . The collected

filtrate was extracted with  $\text{Et}_2\text{O}$  and the organic layer was washed with brine and dried over  $\text{Na}_2\text{SO}_4$ . The solvent was removed under reduced pressure to get the crude material which was carefully purified over silica gel (7.5%  $\text{EtOAc}$ /hexane) to afford compound **9** (252 mg, 45%) as a yellow oil.

$R_f$  = 0.5 (silica, 15%  $\text{EtOAc}$ /hexane);  $[\alpha]_D^{25}$  = -90.2 ( $c$  = 2.0,  $\text{CHCl}_3$ ); IR (thin film)  $\nu_{\text{max}}$  = 3373, 2979, 2832, 1729, 1516, 1369, 1241, 1182, 1036, 895, 821  $\text{cm}^{-1}$ ;  $^1\text{H}$  NMR ( $\text{CDCl}_3$ , 500 MHz)  $\delta$  6.77-6.74 (2H, d,  $J$  = 8.9 Hz), 6.61-6.59 (2H, d,  $J$  = 8.9 Hz), 4.82 (2H, s), 4.14-4.07 (2H, m), 3.92-3.90 (1H, d,  $J$  = 7.56 Hz), 3.77-3.73 (4H, m), 2.63-2.60 (1H, m), 1.78 (3H, s), 1.22-1.18 (6H, m);  $^{13}\text{C}$  NMR ( $\text{CDCl}_3$ , 125 MHz)  $\delta$  173.71, 152.78, 145.94, 141.41, 115.29, 114.83, 112.84, 61.69, 60.67, 55.70, 44.70, 19.52, 15.43, 14.18; HRMS (ESI):  $m/z$  calcd for  $\text{C}_{16}\text{H}_{23}\text{O}_3\text{NNa}^+$   $[\text{M}+\text{Na}]^+$  300.1570, found 300.1579.

**(2S,3R)-ethyl 2-(tert-butoxycarbonylamino)-3,4-dimethylpent-4-enoate (10):** To a solution of ceric

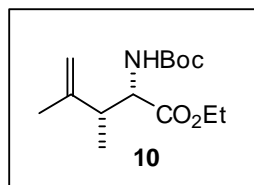

ammonium nitrate (CAN) (643.3 mg, 0.47 mmol) in  $\text{H}_2\text{O}$  (10 mL) was added compound **9** (130 mg, 1.2 mmol) in acetonitrile (5 mL) dropwise at 0 °C and the reaction mixture was stirred at that temperature for 45 min. The reaction mixture was diluted with  $\text{Et}_2\text{O}$  and 1M HCl (5 mL) was added and it was extracted. The aqueous layer was basified with sat.  $\text{NaHCO}_3$  and extracted with  $\text{EtOAc}$ . The organic layer was washed with brine and dried over  $\text{Na}_2\text{SO}_4$ . The solvent was removed under reduced pressure to get the crude material which was dissolved in Dioxane/ $\text{H}_2\text{O}$  (3.0 mL/1.0 mL). To this soln. were added  $\text{Et}_3\text{N}$

(68  $\mu$ L, 0.5 mmol) and (Boc)<sub>2</sub>O (142  $\mu$ L, 0.62 mmol) at 0 °C and the reaction mixture was stirred at room temperature for 12 h. The reaction mixture was extracted with EtOAc and washed with brine, dried over Na<sub>2</sub>SO<sub>4</sub>. The solvent was removed under reduced pressure to get the crude material which was purified over silica gel (7.5% EtOAc/hexane) to afford compound **10** (80 mg, 63%) as a colourless oil.

$R_f$  = 0.6 (silica, 15% EtOAc/hexane);  $[\alpha]_D^{25}$  = +16.2 ( $c$  = 1.25, CHCl<sub>3</sub>); IR (thin film)  $\nu_{\max}$  = 3360, 2979, 2935, 1720, 1504, 1367, 1344, 1249, 1165, 1027 cm<sup>-1</sup>; <sup>1</sup>H NMR (CDCl<sub>3</sub>, 500 MHz)  $\delta$  4.98-4.89 (1H, br), 4.81-4.75 (2H), 4.40-4.37 (1H, m), 4.20-4.14 (2H, m), 2.58-2.55 (1H, m), 1.78 (3H, s), 1.43 (9H, s), 1.26 (3H, t,  $J$  = 7.6 Hz), 1.06-1.04 (3H, d,  $J$  = 6.95 Hz); <sup>13</sup>C NMR (CDCl<sub>3</sub>, 125 MHz)  $\delta$  172.29, 155.49, 145.56, 112.46, 79.75, 61.05, 56.18, 43.87, 28.29, 20.13, 14.41, 14.16; HRMS (ESI):  $m/z$  calcd for C<sub>14</sub>H<sub>25</sub>O<sub>4</sub>NNa<sup>+</sup> [M+Na]<sup>+</sup> 294.1676, found 294.1672.

**(2S,3R)-2-(tert-butoxycarbonylamino)-3,4-dimethylpent-4-enoic acid (26):** To a solution of Compound **10** (110 mg, 0.41 mmol) in THF/H<sub>2</sub>O/MeOH (2 mL/2 mL/0.4 mL) was added LiOH (11 mg, 0.45 mmol) at 0 °C and the reaction mixture was allowed to stir for 2 h at that temperature. After completion of the reaction (monitored by TLC), the reaction mixture was extracted with Et<sub>2</sub>O. The aqueous layer was acidified with 10% NaHSO<sub>4</sub> to pH 2-3 and then extracted with EtOAc, washed with brine and dried over Na<sub>2</sub>SO<sub>4</sub>. The solvent was removed under reduced pressure to afford compound **26** (102

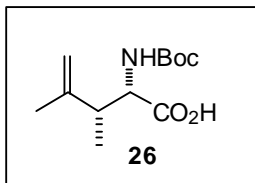

mg, 85%) as a colourless oil.

$R_f$  = 0.2 (silica, 5% CH<sub>3</sub>OH/CH<sub>2</sub>Cl<sub>2</sub>);  $[\alpha]_D^{25}$  = +17.8 ( $c$  = 0.64, CHCl<sub>3</sub>); IR (thin film)  $\nu_{\max}$  = 3324, 2977, 2363, 1734, 1507, 1163 cm<sup>-1</sup>; <sup>1</sup>H NMR (CDCl<sub>3</sub>, 500 MHz)  $\delta$  4.98-4.97 (1H, br), 4.85-4.78 (2H), 4.45 (1H, s), 2.65-2.64 (1H, br), 1.78 (3H, s), 1.42 (9H, s), 1.07-1.06 (3H, d,  $J$  = 6.95 Hz); <sup>13</sup>C NMR (CDCl<sub>3</sub>, 125 MHz)  $\delta$  176.91, 155.67, 145.31, 112.52, 80.07, 55.99, 42.94, 28.24, 20.57, 13.99; HRMS (ESI):  $m/z$  calcd for C<sub>12</sub>H<sub>20</sub>O<sub>4</sub>N [M-H]<sup>-</sup> 242.1398, found 242.1398.

LCMS chromatogram:

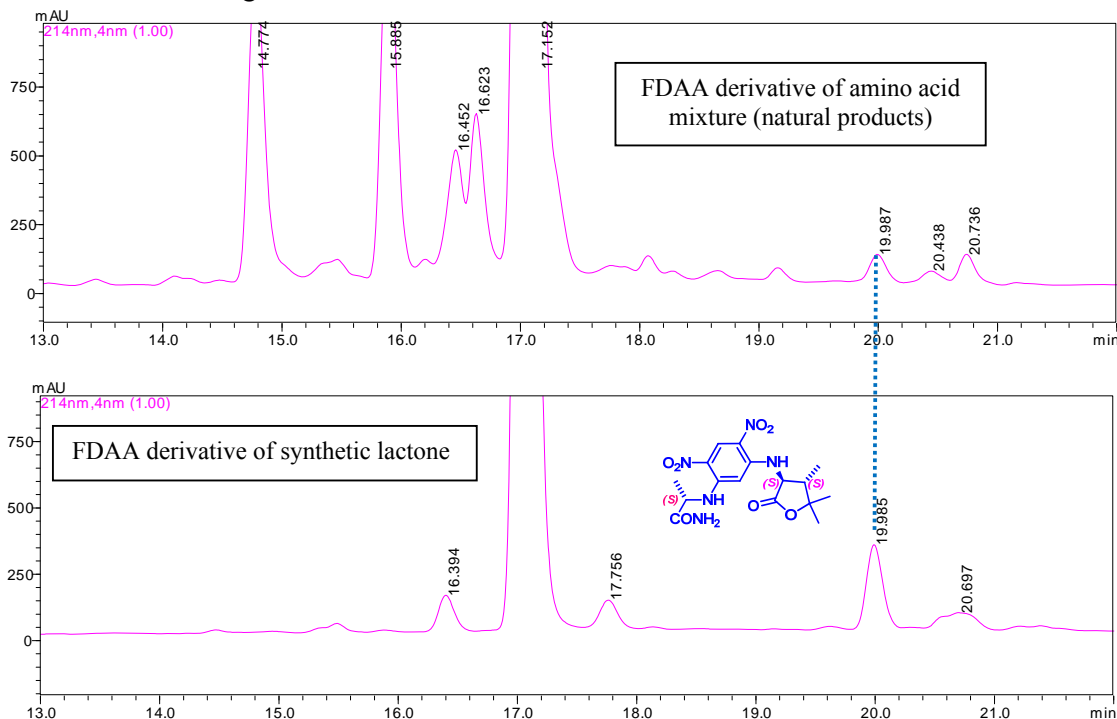

LCMS chromatogram for determining aspartic acid:

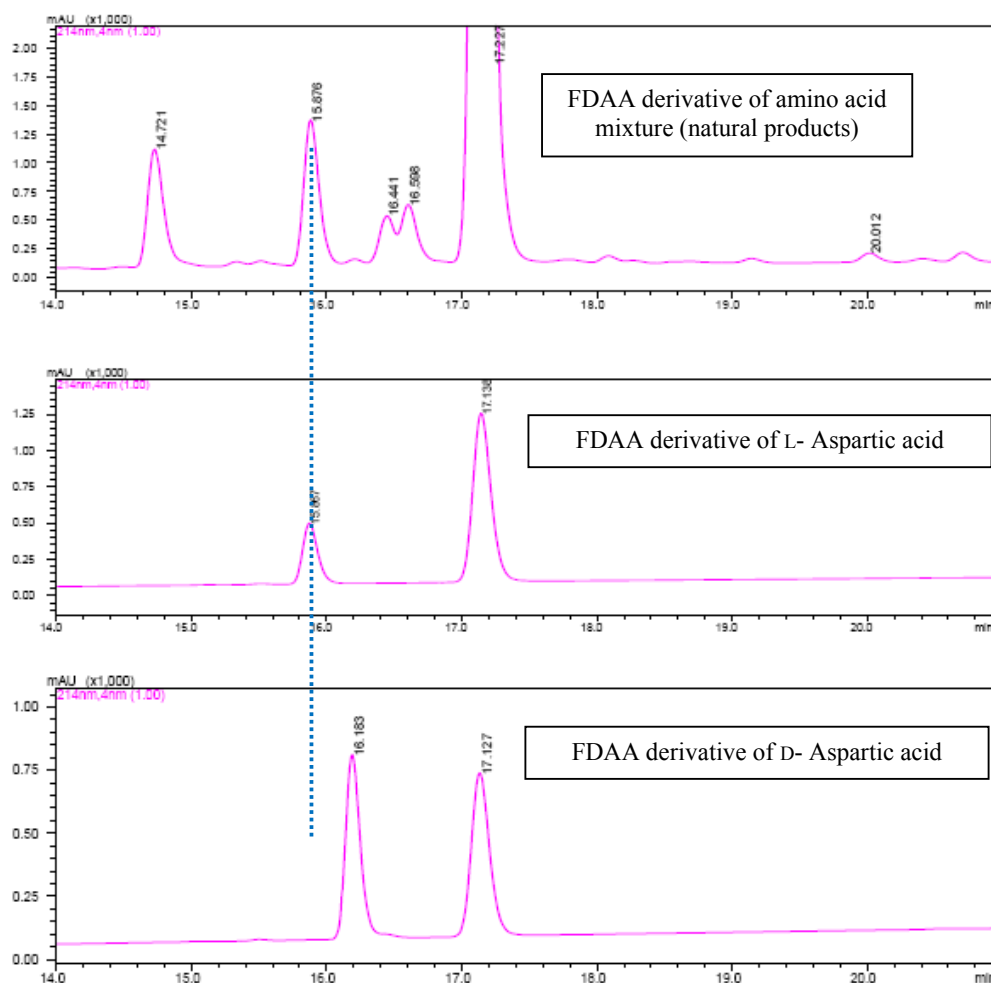

**(Z)-methyl 4-(4-methoxybenzyloxy)-3-methylbut-2-enoate (15):** To the suspension of CuI (640 mg, 3.36 mmol) in dry THF (10 mL) was added MeLi (3.35 mL, 6.70 mmol) at 0 °C and the reaction mixture was allowed to stir for 30 min. at that temperature. To this colourless soln. was added compound **14** (555 mg, 2.24 mmol) dropwise at -78 °C and stirred at that temperature for 4 h. To this reaction mixture was added 16 mL sat. NH<sub>4</sub>Cl soln dropwise and after complete addition it was kept at -78 °C for 10 min. The reaction mixture was then warmed up slowly to room temperature. The precipitate was filtered and the filtrate was extracted with Et<sub>2</sub>O. The organic layer was washed with brine and dried over Na<sub>2</sub>SO<sub>4</sub>. The solvent was removed under reduced pressure to get the crude material which was purified over silica gel (1.5% EtOAc/hexane) to obtain compound **15** (400 mg, 69%, exclusive Z-isomer) as a colourless oil.

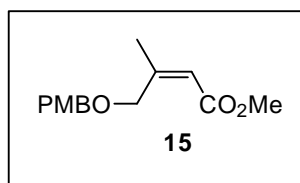

$R_f = 0.7$  (silica, 5% EtOAc/hexane); IR (thin film)  $\nu_{\max} = 2952, 2838, 1716, 1613, 1515, 1444, 1363, 1248, 1153, 1035, 1032, 820 \text{ cm}^{-1}$ ; <sup>1</sup>H NMR (CDCl<sub>3</sub>, 500 MHz)  $\delta$  7.26-7.24 (2H, d,  $J = 8.2$  Hz), 6.87-6.85 (2H, d,  $J = 8.85$  Hz), 5.74 (1H, d,  $J = 1.9$  Hz), 4.61 (2H, s), 4.43 (4H, s), 3.78 (3H, s), 3.66 (3H, s), 1.98 (3H, s); <sup>13</sup>C NMR (CDCl<sub>3</sub>, 125 MHz)  $\delta$  166.29, 156.18, 157.47, 130.32, 129.23, 116.70, 113.74, 72.35, 68.99, 55.20, 50.97, 21.69; HRMS (ESI):  $m/z$  calcd for C<sub>14</sub>H<sub>18</sub>O<sub>4</sub>Na<sup>+</sup> [M+Na]<sup>+</sup> 273.1097, found 273.1106.

**(2R,3R)-methyl 2,3-dihydroxy-4-(4-methoxybenzyloxy)-3-methylbutanoate (16) :** To a solution of compound **15** (80 mg, 0.30 mmol) in <sup>1</sup>BuOH/H<sub>2</sub>O (1:1, 8 mL) were added AD-mix  $\alpha$  (420 mg, 1.4 gm/mmol) and methanesulfonamide (30 mg, 100 mg/mmol) at -1 °C and the reaction mixture was allowed to stir

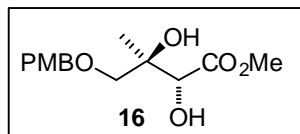

for 96 h at that temperature. The reaction was quenched by addition of Na<sub>2</sub>SO<sub>3</sub> (444 mg, 1.48 mg/mmol) and stirred for 1 h at room temperature until it became colourless. CH<sub>2</sub>Cl<sub>2</sub> was used for extraction and the organic layer was washed with brine, dried over Na<sub>2</sub>SO<sub>4</sub> and concentrated under reduced pressure to get the crude product which was purified over silica gel (20% EtOAc/hexane) to obtain compound **16** (75 mg, 85%) as a colourless oil. The enantiomeric excess was determined through HPLC analysis with Chiralpak-IA column (0.46 cm □x25 cm) using hexanes/2-propanol (90:10) at a flow rate of 1.0 mL/min; detection UV 210 nm; 82 % *ee*.

*R<sub>f</sub>* = 0.3 (silica, 25% EtOAc/hexane); [ $\alpha$ ]<sub>D</sub><sup>25</sup> = -16.2 (*c* = 4.0, CHCl<sub>3</sub>); IR (thin film)  $\nu_{\max}$  = 3473, 2954, 2863, 1728, 1613, 1515, 1248, 1174, 1091, 1032 cm<sup>-1</sup>; <sup>1</sup>H NMR (CDCl<sub>3</sub>, 500 MHz)  $\delta$  7.23 (2H, d, *J* = 8.85 Hz), 6.88 (2H, d, *J* = 8.85 Hz), 4.43 (2H, s), 4.1 (1H, s), 3.80 (3H, s), 3.7 (3H, s), 3.47 (1H, d, *J* = 9.45 Hz), 3.37 (1H, d, *J* = 8.85 Hz), 1.22 (3H, s); <sup>13</sup>C NMR (CDCl<sub>3</sub>, 125 MHz)  $\delta$  173.39, 159.35, 129.44, 113.8, 75.26, 74.31, 73.32, 73.18, 55.25, 52.39, 20.65; HRMS (ESI): *m/z* calcd for C<sub>14</sub>H<sub>20</sub>O<sub>6</sub>Na<sup>+</sup> [M+Na]<sup>+</sup> 307.1152, found 307.1159.

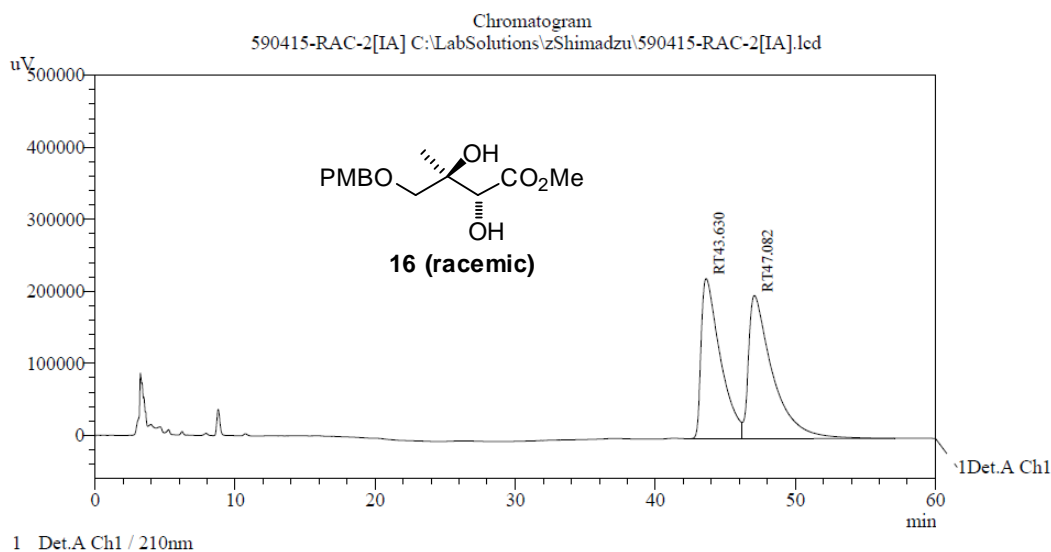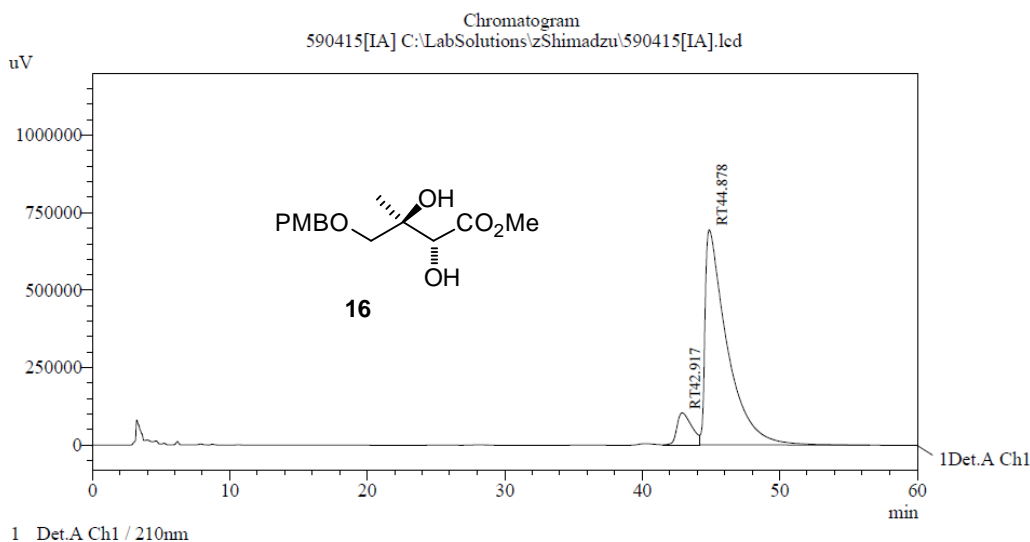

PeakTable

| Detector A Ch1 210nm |          |           |          |        |         |       |
|----------------------|----------|-----------|----------|--------|---------|-------|
| Peak#                | Name     | Ret. Time | Area     | Height | Area %  | Units |
| 1                    | RT42.917 | 42.917    | 7642634  | 102964 | 8.989   | ppm   |
| 2                    | RT44.878 | 44.878    | 77378875 | 694312 | 91.011  | ppm   |
| Total                |          |           | 85021509 | 797275 | 100.000 |       |

**Cyclic sulfate (17):** To a solution of compound **16** (835 mg, 2.94 mmol) in CH<sub>2</sub>Cl<sub>2</sub> (20 mL) were added Et<sub>3</sub>N (1.03 mL, 7.35 mmol) and SOCl<sub>2</sub> (540  $\mu$ L, 7.35 mmol) carefully at 0 °C and then the reaction mixture was allowed to stir for 30 min. at that temperature. After consumption of the starting material (checked by TLC), CH<sub>2</sub>Cl<sub>2</sub> was evaporated in vacuo and the resulting cyclic sulphite was eluted with Et<sub>2</sub>O through silica plug. The organic layer was washed with brine, dried over Na<sub>2</sub>SO<sub>4</sub> and concentrated under reduced pressure to get the crude product which was dissolved in CH<sub>3</sub>CN (14 mL). To this soln. were added RuCl<sub>3</sub> (2 mg), NaIO<sub>4</sub> (1.13 gm, 5.3 mmol), and H<sub>2</sub>O (18 mL) at 0 °C and the reaction mixture was allowed to stir for 30 min. at that temperature. The reaction mixture was diluted with Et<sub>2</sub>O and extracted. The organic layer was washed with brine, dried over Na<sub>2</sub>SO<sub>4</sub> and concentrated under reduced pressure to get the crude product which was purified over silica gel (20% EtOAc/hexane) to afford compound **17** (800 mg, 79%) as a colourless oil.

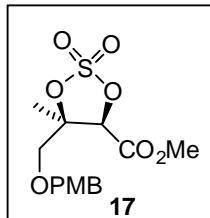

$R_f$  = 0.45 (silica, 20% EtOAc/hexane);  $[\alpha]_D^{25}$  = +34.3 ( $c$  = 4.2, CHCl<sub>3</sub>); IR (thin film)  $\nu_{max}$  = 2957, 2875, 1766, 1742, 1612, 1516, 1440, 1418, 1302, 1249, 1215, 1176 cm<sup>-1</sup>; <sup>1</sup>H NMR (CDCl<sub>3</sub>, 300 MHz)  $\delta$  7.21 (2H, d,  $J$  = 8.7 Hz), 6.88 (2H, d,  $J$  = 8.7 Hz), 4.99 (1H, s), 4.43 (2H, q), 3.8 (3H, s), 3.77 (1H, d,  $J$  = 10.35 Hz), 3.7 (3H, s), 3.59 (1H, d,  $J$  = 10.35 Hz), 1.75 (3H, s); <sup>13</sup>C NMR (CDCl<sub>3</sub>, 75 MHz)  $\delta$  163.65, 159.50, 129.38, 128.72, 113.85, 91.87, 81.56, 73.35, 69.89, 55.26, 53.02, 22.15; HRMS (ESI):  $m/z$  calcd for C<sub>14</sub>H<sub>18</sub>O<sub>8</sub>Na<sup>+</sup> [M+Na]<sup>+</sup> 369.0615, found 369.0624.

**(2S,3S)-methyl 2-azido-3-hydroxy-4-(4-methoxybenzyloxy)-3-methylbutanoate (18):** To a solution of compound **17** (800 mg, 2.31 mmol) in acetone/H<sub>2</sub>O (56 mL/ 14 mL) was added NaN<sub>3</sub> (900 mg, 13.87 mmol) and the mixture was heated at 50 °C for 9 h. After consumption of the starting material (checked by TLC), acetone was evaporated in vacuo and the residue was dissolved in Et<sub>2</sub>O. 20% H<sub>2</sub>SO<sub>4</sub> (10 mL) was added carefully at 0 °C and the mixture was allowed to stir for 12 h at room temperature. Et<sub>2</sub>O was used for extraction and the organic layer was washed with brine, dried over

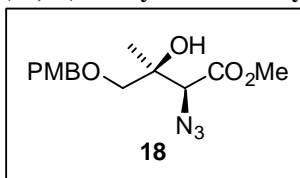

Na<sub>2</sub>SO<sub>4</sub>, and concentrated under reduced pressure to get the crude product which was purified over silica gel (15% EtOAc/hexane) to obtain compound **18** (560 mg, 78%) as colourless oil.

$R_f$  = 0.48 (silica, 20% EtOAc/hexane);  $[\alpha]_D^{25}$  = -34.4 ( $c$  = 4.5, CHCl<sub>3</sub>); IR (thin film)  $\nu_{max}$  = 3512, 2909, 2864, 2114, 1733, 1613, 1514, 1248, 1207, 1175, 1094, 1032, 821 cm<sup>-1</sup>; <sup>1</sup>H NMR (CDCl<sub>3</sub>, 300 MHz)  $\delta$  7.23 (2H, d,  $J$  = 8.7 Hz), 6.88 (2H, d,  $J$  = 8.7 Hz), 4.43 (2H, s), 4.02 (1H, s), 3.80 (3H, s), 3.66 (3H, s), 3.47 (1H, d,  $J$  = 9.36 Hz), 3.37 (1H, d,  $J$  = 9.36 Hz), 1.26 (3H, s); <sup>13</sup>C NMR (CDCl<sub>3</sub>, 75 MHz)  $\delta$  169.43, 159.39, 129.62, 129.58, 113.77, 74.39, 73.7, 73.29, 66.7, 55.27, 52.52, 22.29; HRMS (ESI):  $m/z$  calcd for C<sub>14</sub>H<sub>19</sub>O<sub>5</sub>N<sub>3</sub>Na<sup>+</sup> [M+Na]<sup>+</sup> 332.1217, found 332.1229.

**(2S,3S)-methyl 2-azido-3-(diethyl(propyl)silyloxy)-4-hydroxy-3-methylbutanoate (19):** To a solution of compound **18** (560 mg, 1.81 mmol) in CH<sub>2</sub>Cl<sub>2</sub> (20 mL) were added Et<sub>3</sub>N (1.02 mL, 7.25 mmol) and TESOTf (1.02 mL, 4.53 mmol) slowly at 0 °C and it was allowed to stir for 45 min. at that temperature. CH<sub>2</sub>Cl<sub>2</sub> was used for extraction and was washed with brine, dried over Na<sub>2</sub>SO<sub>4</sub> and concentrated under reduced pressure to get the crude product which was purified over silica gel to get 680 mg (1.61 mmol) of pure protected compound. To a solution of the TES protected compound in CH<sub>2</sub>Cl<sub>2</sub> (30 mL) were added 6.1 mL phosphate buffer (pH 7.5) and DDQ (912 mg, 4.02 mmol) at 0 °C and it was allowed to stir for 3 h at room temperature. After completion of the reaction, it was directly transferred into a silica gel column and purified (7.5% EtOAc/hexane) to obtain compound **19** (268 mg, 70% over two steps) as a colourless oil.

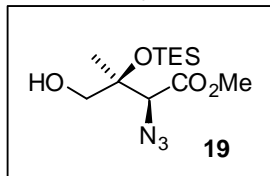

$R_f$  = 0.5 (silica, 20% EtOAc/hexane);  $[\alpha]_D^{25}$  = +15.6 ( $c$  = 1.0, CHCl<sub>3</sub>); IR (thin film)  $\nu_{max}$  = 3440, 2956, 2878, 2114, 1747, 1458, 1436, 1277, 1243, 1174, 1057, 1010, 746 cm<sup>-1</sup>; <sup>1</sup>H NMR (CDCl<sub>3</sub>, 500 MHz)  $\delta$  3.94 (1H, s), 3.84 (3H, s), 3.65-3.57 (1H, dd,  $J$  = 11.35, 7.55 Hz), 3.56-3.53 (1H, dd,  $J$  = 11.35, 7.55 Hz), 2.0-1.98 (1H, m), 1.38 (3H, s), 0.97 (9H, t,  $J$  = 8.2), 0.64 (6H, q,  $J$  = 8.2); <sup>13</sup>C NMR (CDCl<sub>3</sub>, 125 MHz)  $\delta$  169.20, 78.31, 68.40, 67.38, 52.40, 21.93, 6.83, 6.58; HRMS (ESI):  $m/z$  calcd for C<sub>12</sub>H<sub>26</sub>O<sub>4</sub>N<sub>3</sub>Si [M+H]<sup>+</sup> 304.1693, found 304.2841.

**(2S,3S)-3-azido-2-hydroxy-4-methoxy-2-methyl-4-oxobutanoic acid (20):** To a solution of compound **19** (240 mg, 0.8 mmol) in dry CH<sub>2</sub>Cl<sub>2</sub> (25 mL) were added TEMPO (25 mg, 0.16 mmol) and diacetoxyiodobenzene (773 mg, 2.4 mmol) at 0 °C and it was allowed to stir for 10 h. at room temperature. CH<sub>2</sub>Cl<sub>2</sub> was concentrated

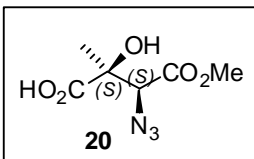

and directly transferred into a silica gel column and purified (3% EtOAc/hexane) to obtain 168 mg (70%) of aldehyde which was again dissolved in THF/H<sub>2</sub>O/<sup>i</sup>BuOH (12 mL/ 12 mL/ 2.4 mL) and to this soln. were added 4.8 mL 2-methyl-2-butene, NaClO<sub>2</sub> (160 mg, 1.8 mmol) and NaH<sub>2</sub>PO<sub>4</sub> (400 mg, 3.34 mmol) in 6 mL H<sub>2</sub>O at 0 °C and the reaction mixture was allowed to stir for 12 h at room temperature. THF was removed under reduced pressure and 50 mL 1M HCl was added and then extracted with EtOAc. The organic layer was washed with brine, dried over Na<sub>2</sub>SO<sub>4</sub> and concentrated under reduced pressure to get the residue which was dissolved in 12 mL sat. NaHCO<sub>3</sub> and extracted with Et<sub>2</sub>O. The aqueous layer was acidified with 10 mL 3M HCl and then extracted with EtOAc. The organic layer was washed with brine, dried over Na<sub>2</sub>SO<sub>4</sub> and concentrated under reduced pressure to obtain compound **20** (101mg, 63% over two steps) as a colourless oil.

$R_f$  = 0.2 (silica, 5% CH<sub>3</sub>OH/CH<sub>2</sub>Cl<sub>2</sub>);  $[\alpha]_D^{25}$  = -44.1 ( $c$  = 2.0, CHCl<sub>3</sub>); IR (thin film)  $\nu_{\max}$  = 3490, 2959, 2117, 1730, 1438, 1263, 1215, 1182, 1106, 1013, 847 cm<sup>-1</sup>; <sup>1</sup>H NMR (CDCl<sub>3</sub>, 300 MHz)  $\delta$  4.16 (1H, s), 3.88 (3H, s), 1.57 (3H, s); <sup>13</sup>C NMR (CDCl<sub>3</sub>, 75 MHz)  $\delta$  176.61, 167.99, 66.37, 53.03, 23.05; HRMS (ESI):  $m/z$  calcd for C<sub>6</sub>H<sub>8</sub>O<sub>3</sub>N<sub>3</sub> [M-H] 202.0469, found 202.0473.

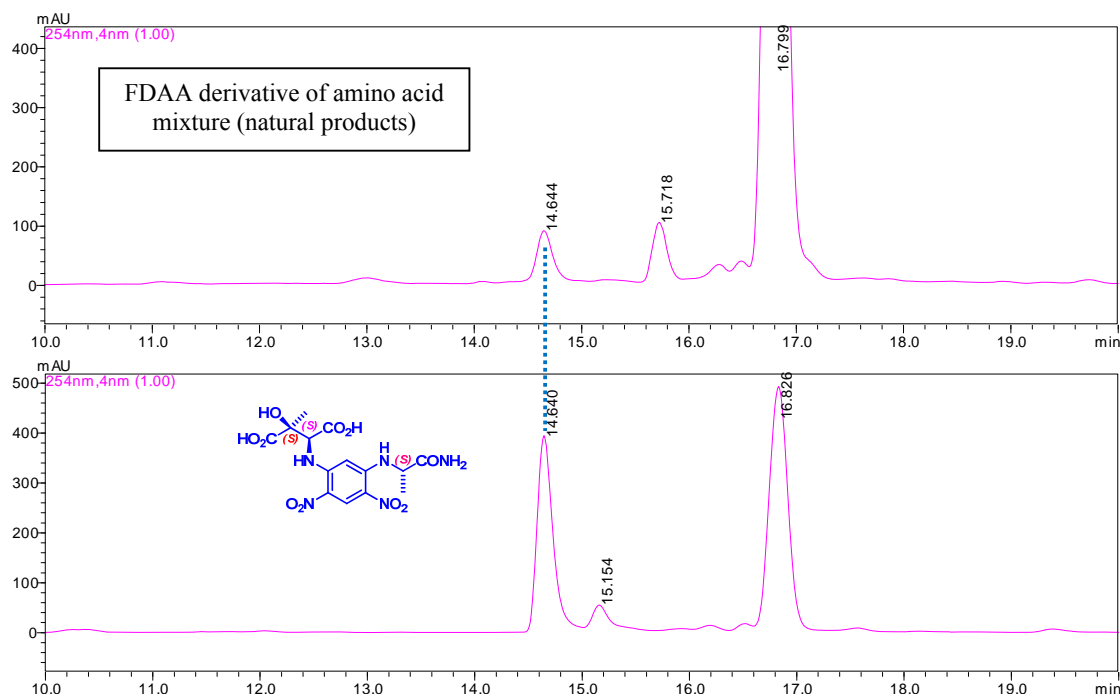

**(S)-5-(2-methylheptylthio)-1-phenyl-1H-tetrazole (22):** To a solution of compound **21a** (1.9 gm, 6.27 mmol) in dry Et<sub>2</sub>O (25 mL) was added LiBH<sub>4</sub> (410 mg, 18.81 mmol) at 0 °C and it was allowed to stir for 2 h. at room temperature. MeOH was added slowly to quench and after getting the clear soln., the solvent was evaporated and the residue was extracted with CH<sub>2</sub>Cl<sub>2</sub>. The organic layer was washed with brine, dried over Na<sub>2</sub>SO<sub>4</sub> and concentrated under reduced pressure to obtain 600 mg of pure corresponding alcohol (74%). To the soln. of resulting alcohol in dry THF (50 mL) were added PPh<sub>3</sub> (1.7 gm, 6.46 mmol), 1-phenyl-1H-tetrazole-5-thiol (1.15 gm, 6.46 mmol) and DIAD (1.3 mL, 6.46 mmol) at 0 °C and it was allowed to stir for 8 h. at room temperature. THF was concentrated and directly transferred into silica gel column and purified (5% EtOAc/hexane) to obtain compound **22** (1.02 gm, 56% over two steps) as a colourless oil.

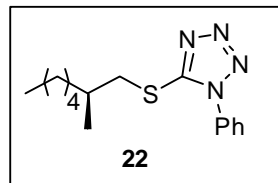

$R_f$  = 0.6 (silica, 15% EtOAc/hexane);  $[\alpha]_D^{25}$  = +1.4 ( $c$  = 1.84, CHCl<sub>3</sub>); IR (thin film)  $\nu_{\max}$  = 2957, 2927, 2856, 1600, 1500, 1386, 1240, 760 cm<sup>-1</sup>; <sup>1</sup>H NMR (CDCl<sub>3</sub>, 500 MHz)  $\delta$  7.54-7.51 (4H, m), 5.24-5.21 (1H, m), 3.47-3.43 (1H, dd,  $J$  = 12.6, 5.7 Hz), 3.27-3.23 (1H, m), 1.93-1.90 (1H, m), 1.49-1.34 (2H, m), 1.31-1.22 (7H, m), 1.03-1.01 (3H, d,  $J$  = 6.3 Hz), 0.88-0.86 (3H, t,  $J$  = 6.95 Hz); <sup>13</sup>C NMR (CDCl<sub>3</sub>, 125 MHz)  $\delta$  154.72, 133.77, 130.00, 129.71, 123.85, 74.29, 40.53, 35.84, 32.91, 31.86, 26.42, 22.52, 21.54, 19.05, 13.98; HRMS (ESI):  $m/z$  calcd for C<sub>15</sub>H<sub>22</sub>N<sub>4</sub>SN<sup>+</sup> [M+Na]<sup>+</sup> 313.1457, found 313.1455.

**(S)-5-(2-methylheptylsulfonyl)-1-phenyl-1H-tetrazole (23):** To a solution of compound **22** (1.02 gm, 3.52 mmol) in absolute EtOH (60 mL) was added (NH<sub>4</sub>)<sub>6</sub>Mo<sub>7</sub>O<sub>24</sub>·4H<sub>2</sub>O (870 mg, 0.7 mmol) dissolved in 19 mL H<sub>2</sub>O<sub>2</sub> at 0 °C and it was allowed to stir for 8 h. at room temperature. The solvent was evaporated and then the residue was extracted with EtOAc, washed with brine, dried over Na<sub>2</sub>SO<sub>4</sub> and concentrated under reduced pressure to get the crude product which was purified over silica gel (7.5% EtOAc/hexane) to afford compound **23**

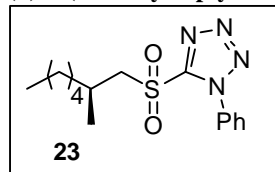

(1.1 gm, 98%) as a colourless oil.

$R_f$  = 0.38 (silica, 15% EtOAc/hexane);  $[\alpha]_D^{25}$  = -8.3 ( $c$  = 1.75, CHCl<sub>3</sub>); IR (thin film)  $\nu_{max}$  = 2957, 2930, 2859, 1497, 1339, 1153, 762 cm<sup>-1</sup>; <sup>1</sup>H NMR (CDCl<sub>3</sub>, 300 MHz)  $\delta$  7.70-7.66 (2H, m), 7.62-7.56 (3H, m), 3.84-3.77 (1H, dd,  $J$  = 14.5, 4.9 Hz), 3.61-3.54 (1H, dd,  $J$  = 14.5, 8.07 Hz), 2.36-2.30 (1H, m), 1.57-1.50 (1H, m), 1.38-1.28 (7H, m), 1.16-1.14 (3H, d,  $J$  = 6.8 Hz), 0.90-0.85 (3H, t,  $J$  = 7.0 Hz); <sup>13</sup>C NMR (CDCl<sub>3</sub>, 75 MHz)  $\delta$  154.08, 133.07, 131.40, 129.63, 125.13, 61.84, 36.49, 31.57, 28.22, 25.93, 22.46, 19.68, 13.95; HRMS (ESI):  $m/z$  calcd for C<sub>15</sub>H<sub>22</sub>O<sub>2</sub>N<sub>4</sub>SN<sup>+</sup> [M+Na]<sup>+</sup> 345.1356, found 345.1348.

**(S,E)-tert-butyl(5-methyldec-3-enyloxy)diphenylsilane (24):** To a solution of compound **23** (200 mg, 0.62 mmol) in dry DME (4 mL) was added KHMDS (1.4 mL, 0.5M in toluene, 0.7 mmol) dropwise at -60 °C and it was stirred at that temperature for 1 h. Then 3-(tert-butyldiphenylsilyloxy)propanal (290 mg, 0.92 mmol) in DME (4 mL) was added slowly at -60 °C and it was allowed to stir for 12 h. To this reaction mixture 2 mL H<sub>2</sub>O was added and it was vigorously stirred for 1 h. The reaction

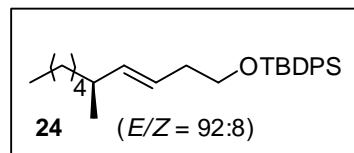

mixture was extracted with Et<sub>2</sub>O, washed with brine, dried over Na<sub>2</sub>SO<sub>4</sub> and concentrated under reduced pressure to get the crude product which was purified over silica gel (1.5% EtOAc/hexane) to afford compound **24** (89 mg, 35%) as a colourless oil.

$R_f$  = 0.8 (silica, 5% EtOAc/hexane);  $[\alpha]_D^{25}$  = +13.5 ( $c$  = 0.6, CHCl<sub>3</sub>); IR (thin film)  $\nu_{max}$  = 2957, 2929, 2857, 1738, 1472, 1429, 1112, 969, 823, 736 cm<sup>-1</sup>; <sup>1</sup>H NMR (CDCl<sub>3</sub>, 300 MHz)  $\delta$  7.69-7.67 (4H, d,  $J$  = 5.8 Hz), 7.42-7.35 (6H, m), 5.37-5.34 (2H, m), 3.70-3.66 (2H, t,  $J$  = 6.6 Hz), 2.29-2.23 (2H, m), 2.05 (1H, m), 1.44-1.25 (10H, m), 1.05 (9H, s), 1.01-0.93 (3H, d,  $J$  = 8.0 Hz), 0.90-0.85 (3H, t,  $J$  = 7.0 Hz); <sup>13</sup>C NMR (CDCl<sub>3</sub>, 75 MHz)  $\delta$  138.66, 135.60, 134.13, 129.48, 127.55, 124.51, 64.12, 37.07, 36.73, 36.08, 32.02, 26.96, 26.85, 22.63, 20.68, 19.23, 14.10; GCMS (M<sup>+</sup>Bu) 351.2.

**(S,E)-5-methyldec-3-enoic acid (25a):** To a solution of compound **24** (89 mg, 0.22 mmol) in dry THF (2 mL) was added TBAF (335  $\mu$ L, 0.33 mmol) at 0 °C and it was allowed to stir for 2 h. at room temperature. The reaction was quenched with sat. NH<sub>4</sub>Cl and THF was evaporated and the residue was extracted with Et<sub>2</sub>O, washed with brine, dried over Na<sub>2</sub>SO<sub>4</sub> and concentrated under reduced pressure to get the crude product which was purified over silica gel (10% EtOAc/hexane) to get 26 mg (70%) of corresponding alcohol. To the soln. of CrO<sub>3</sub> (100 mg, 1.0 mmol) in 1 mL 3M H<sub>2</sub>SO<sub>4</sub> was added the alcohol in 2 mL acetone at 0 °C and it was allowed to stir for 3 h. at room temperature. The reaction mixture was quenched with EtOH and filtered through filter paper. The filtrate was concentrated and the residue was extracted with EtOAc, washed with brine, dried over Na<sub>2</sub>SO<sub>4</sub> and concentrated under reduced pressure to get the crude product which was purified over silica gel (25% EtOAc/hexane) to afford compound **25a** (20 mg, 72%) as a colourless oil.

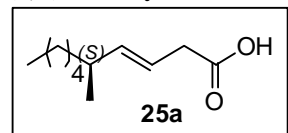

$R_f$  = 0.3 (silica, 50% EtOAc/hexane);  $[\alpha]_D^{25}$  = +14.0 ( $c$  = 2.0, CHCl<sub>3</sub>); IR (thin film)  $\nu_{max}$  = 2957, 2927, 2855, 1713, 1703, 1462, 1248, 969, 805, 725 cm<sup>-1</sup>; <sup>1</sup>H NMR (CDCl<sub>3</sub>, 500 MHz)  $\delta$  5.48-5.46 (2H, m), 3.07 (2H, d,  $J$  = 5.0 Hz), 1.29 (8H, br), 0.96 (3H, d,  $J$  = 8.0 Hz), 0.86 (3H, t,  $J$  = 7.0 Hz); <sup>13</sup>C NMR (CDCl<sub>3</sub>, 75 MHz)  $\delta$  176.66, 141.34, 118.95, 37.55, 36.77, 36.61, 31.93, 26.86, 22.61, 20.32, 14.05; HRMS (ESI):  $m/z$  calcd for C<sub>11</sub>H<sub>19</sub>O<sub>2</sub> [M-H]<sup>-</sup> 183.1391, found 183.1389.

**(S)-dimethyl-2-((2S,3R)-2-(tert-butoxycarbonylamino)-3,4-dimethylpent-4-enamido) succinate (28):**

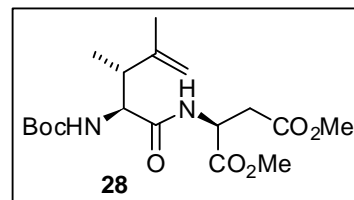

To a soln. of **26** (60 mg, 0.25 mmol) in dry CH<sub>2</sub>Cl<sub>2</sub> (2mL) were added DIPEA (87  $\mu$ L, 0.5 mmol), dimethylaspartate hydrochloride salt (73 mg, 0.37 mmol), HATU (113 mg, 0.3 mmol) and HOAt (3.5 mg, 0.03 mmol) at -10 °C and it was allowed to stir for 12 h. at room temperature. The reaction was extracted with CH<sub>2</sub>Cl<sub>2</sub>, washed with brine, dried over Na<sub>2</sub>SO<sub>4</sub> and concentrated under reduced pressure to get the crude product which was purified over silica gel (35% EtOAc/hexane) to afford compound **28** (76 mg, 80%) as a colourless oil.



$R_f = 0.3$  (silica, 40% EtOAc/hexane);  $[\alpha]_D^{25} = +22.4$  ( $c = 0.8$ ,  $\text{CHCl}_3$ ); IR (thin film)  $\nu_{\max} = 3317, 3256, 3077, 2979, 1747, 1682, 1655, 1557, 1519, 1434, 1367, 1303, 1168, 1013 \text{ cm}^{-1}$ ;  $^1\text{H}$  NMR ( $\text{CDCl}_3$ , 500 MHz)  $\delta$  6.98 (1H, br), 4.87 (2H, s), 4.77 (2H, s), 4.2 (1H, br), 3.74 (3H, s), 3.67 (3H, s), 3.0 (1H, dd,  $J = 17.6, 4.4 \text{ Hz}$ ), 2.86 (1H, dd,  $J = 17.6, 4.4 \text{ Hz}$ ), 2.68 (1H, t,  $J = 6.9$ ), 1.77 (3H, s), 1.42 (9H, s), 0.99 (3H, d,  $J = 6.9$ );  $^{13}\text{C}$  NMR ( $\text{CDCl}_3$ , 125 MHz)  $\delta$  171.21, 170.72, 155.63, 145.96, 112.34, 80.13, 57.04, 52.66, 51.91, 48.68, 42.39, 35.98, 28.19, 21.08, 13.84; HRMS (ESI):  $m/z$  calcd for  $\text{C}_{18}\text{H}_{30}\text{O}_7\text{N}_2\text{Na}^+$   $[\text{M}+\text{Na}]^+$  409.1945, found 409.1953.

**(S)-dimethyl-2-((2S,3R)-2-((2S,3S)-3-azido-2-hydroxy-4-methoxy-2-methyl-4-oxobutanamido)-3,4-dimethylpent-4-enamido)succinate (29):** To a soln. of **28** (30 mg, 0.08 mmol) in dry  $\text{CH}_2\text{Cl}_2$  (1 mL) was added TFA (500  $\mu\text{L}$ ) at  $0^\circ\text{C}$  and it was allowed to stir for 2 h. at room temperature.  $\text{CH}_2\text{Cl}_2$  was concentrated under reduced pressure to get the TFA salt which was dissolved in dry  $\text{CH}_2\text{Cl}_2$  (1 mL) and to this soln. were added DIPEA (34  $\mu\text{L}$ , 0.2 mmol), compound

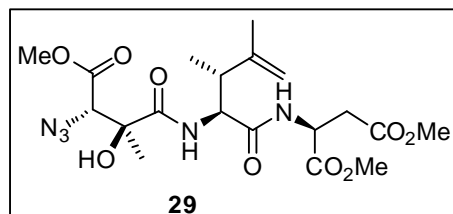

**20** (16 mg, 0.08 mmol) in  $\text{CH}_2\text{Cl}_2$  (1 mL), HATU (60 mg, 0.16 mmol) and HOAt (5 mg, 0.04 mmol) at  $-10^\circ\text{C}$  and it was allowed to stir for 12 h. at room temperature.

The reaction was extracted with  $\text{CH}_2\text{Cl}_2$ , washed with brine, dried over  $\text{Na}_2\text{SO}_4$  and concentrated under reduced pressure to get the crude product which was purified over silica gel (65% EtOAc/hexane) to obtain compound **29** (18 mg, 50% over two steps).

$R_f = 0.3$  (silica, 50% EtOAc/hexane);  $[\alpha]_D^{25} = -34.7$  ( $c = 1.0$ ,  $\text{CHCl}_3$ ); IR (thin film)  $\nu_{\max} = 3305, 2106, 1744, 1738, 1652, 1544, 1438, 1299, 1133, 1002, 912, 856, 732 \text{ cm}^{-1}$ ;  $^1\text{H}$  NMR ( $\text{CDCl}_3$ , 500 MHz)  $\delta$  7.19 (1H, d,  $J = 8.8 \text{ Hz}$ ), 6.99 (1H, d,  $J = 7.6 \text{ Hz}$ ), 4.91 (1H, s), 4.84 (1H, s), 4.80-4.78 (1H, m), 4.57-4.54 (1H, m), 4.23 (1H, s), 3.90 (1H, s), 3.85 (3H, s), 3.75 (3H, s), 3.69 (3H, s), 2.98 (1H, dd,  $J = 17.3, 4.4 \text{ Hz}$ ), 2.88 (1H, dd,  $J = 17.3, 4.4 \text{ Hz}$ ), 2.80-2.77 (1H, m), 1.8 (3H, s), 1.48 (3H, s), 1.08 (3H, d,  $J = 6.9 \text{ Hz}$ );  $^{13}\text{C}$  NMR ( $\text{CDCl}_3$ , 125 MHz)  $\delta$  172.62, 171.24, 170.67, 170.46, 169.28, 145.60, 112.59, 65.84, 55.53, 52.90, 52.76, 52.03, 48.71, 42.14, 38.58, 35.85, 29.66, 23.92, 20.86, 14.11; HRMS (ESI):  $m/z$  calcd for  $\text{C}_{19}\text{H}_{29}\text{O}_9\text{N}_5\text{Na}^+$   $[\text{M}+\text{Na}]^+$  494.1857, found 494.1851.

**(S)-dimethyl-2-((2S,3R)-2-((2S,3S)-2-hydroxy-4-methoxy-2-methyl-3-((S,E)-5-methyldec-enamido)-4-oxobutanamido)-3,4-dimethylpent-4-enamido)succinate (30):** To a soln. of **29** (20 mg, 0.04 mmol) in THF/ $\text{H}_2\text{O}$  (3 mL/300  $\mu\text{L}$ ) was added  $\text{Me}_3\text{P}$  (300  $\mu\text{L}$ , 1.0M in THF) at  $0^\circ\text{C}$  and it was allowed to stir for 1 h. After complete consumption of **29** THF was removed in

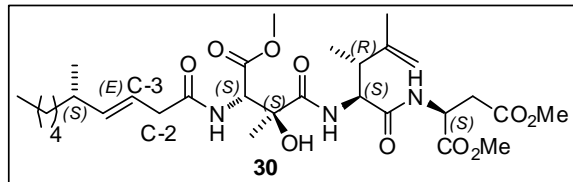

*vacuo* and extracted with EtOAc, washed with brine, dried over  $\text{Na}_2\text{SO}_4$  and concentrated under reduced pressure to get the crude product which was purified over silica gel (5% MeOH/  $\text{CH}_2\text{Cl}_2$ ) to get 13 mg (0.03 mmol) of corresponding amine which was dissolved in dry  $\text{CH}_2\text{Cl}_2$  (3 mL). To this soln. were added DIPEA (15  $\mu\text{L}$ , 0.09 mmol), compound **25a** (8 mg, 0.04 mmol) in  $\text{CH}_2\text{Cl}_2$  (2 mL), HATU (35 mg, 0.09 mmol) and HOAt (2 mg, 0.02 mmol) at  $-10^\circ\text{C}$  and it was allowed to stir for 12 h. at room temperature. The reaction was extracted with  $\text{CH}_2\text{Cl}_2$ , washed with brine, dried over  $\text{Na}_2\text{SO}_4$  and concentrated under reduced pressure to get the crude product which was purified over silica gel (50% EtOAc/hexane) to afford compound **30** (10 mg, 40% over two steps) as a colourless oil.

$R_f = 0.38$  (silica, 40% EtOAc/hexane);  $[\alpha]_D^{25} = +18.8$  ( $c = 0.25$ ,  $\text{CHCl}_3$ ); IR (thin film)  $\nu_{\max} = 3289, 2957, 2921, 2850, 1748, 1729, 1654, 1647, 1527, 1287, 1210, 1107 \text{ cm}^{-1}$ ;  $^1\text{H}$  NMR ( $\text{CDCl}_3$ , 500 MHz)  $\delta$  7.13 (1H, d,  $J = 8.8 \text{ Hz}$ ), 7.08 (1H, d,  $J = 8.2 \text{ Hz}$ ), 6.88 (1H, d,  $J = 8.2 \text{ Hz}$ ), 5.55 (2H, m), 4.9 (1H, s), 4.84 (3H, m), 4.77 (1H, m), 4.43 (1H, m), 3.75 (3H, s), 3.72 (3H, s), 3.68 (3H, s), 3.0 (3H, m), 2.86 (1H, dd,  $J = 17.3, 4.4 \text{ Hz}$ ), 2.75 (1H, t,  $J = 7 \text{ Hz}$ ), 2.16-2.13 (1H, m), 1.76 (3H, s), 1.46 (3H, s), 1.29 (8H, br), 1.04 (3H, d,  $J = 6.95 \text{ Hz}$ ), 0.97 (3H, d,  $J = 7.0 \text{ Hz}$ ), 0.87 (3H, t,  $J = 7.0 \text{ Hz}$ );  $^{13}\text{C}$  NMR ( $\text{CDCl}_3$ , 125 MHz)  $\delta$  175.86, 172.74, 171.75, 171.29, 170.65, 170.03, 145.59, 142.48, 119.93, 112.68, 76.44, 57.56, 55.19, 52.92, 52.80, 52.04, 48.66, 42.16, 40.19, 36.77, 36.73, 35.88, 31.97, 29.69, 26.92, 23.97, 22.60, 20.93, 20.40, 14.15, 14.08; HRMS (ESI):  $m/z$  calcd for  $\text{C}_{30}\text{H}_{49}\text{O}_{10}\text{N}_3\text{Na}^+$   $[\text{M}+\text{Na}]^+$  634.3310, found 634.3291.

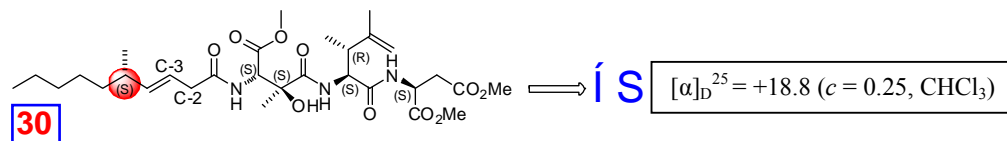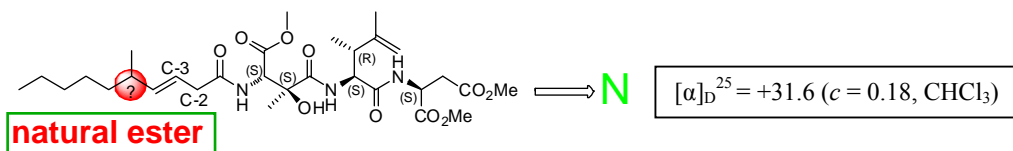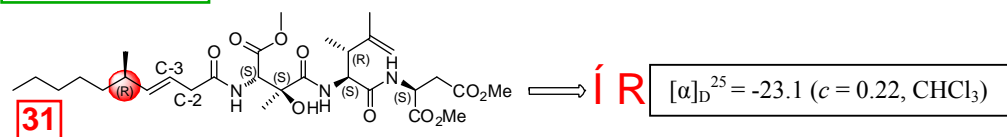

$^{13}\text{C}$  NMR in  $\text{CDCl}_3$  in 125 MHz :

| (7S)/52 | (N)/pentacyclic | (7R)/53 |
|---------|-----------------|---------|
| 14.08   | 14.11           | 14.09   |
| 14.15   | 14.12           | 14.14   |
| 20.40   | 20.42           | 20.41   |
| 20.93   | 20.95           | 20.93   |
| 22.60   | 22.61           | 22.60   |
| 23.97   | 23.96           | 23.97   |
| 26.92   | 26.94           | 26.93   |
| 29.69   | 29.69           | 29.69   |
| 31.97   | 31.97           | 31.97   |
| 35.88   | 35.87           | 35.88   |
| 36.73   | 36.74           | 36.76   |
| 36.77   | 36.76           | 36.76   |
| 40.19   | 40.19           | 40.24   |
| 42.16   | 42.15           | 42.17   |
| 48.66   | 48.63           | 48.66   |
| 52.04   | 52.07           | 52.05   |
| 52.80   | 52.83           | 52.81   |
| 52.92   | 52.95           | 52.92   |
| 55.19   | 55.14           | 55.19   |
| 57.56   | 57.52           | 57.57   |
| 76.44   | 76.44           | 76.44   |
| 112.68  | 112.70          | 112.68  |
| 119.93  | 119.91          | 119.98  |
| 142.48  | 142.50          | 142.46  |
| 145.59  | 145.56          | 145.59  |
| 170.03  | 170.03          | 170.06  |
| 170.65  | 170.66          | 170.66  |
| 171.29  | 171.32          | 171.31  |
| 171.75  | 171.76          | 171.78  |
| 172.74  | 172.76          | 172.69  |
| 175.86  | 175.88          | 175.83  |

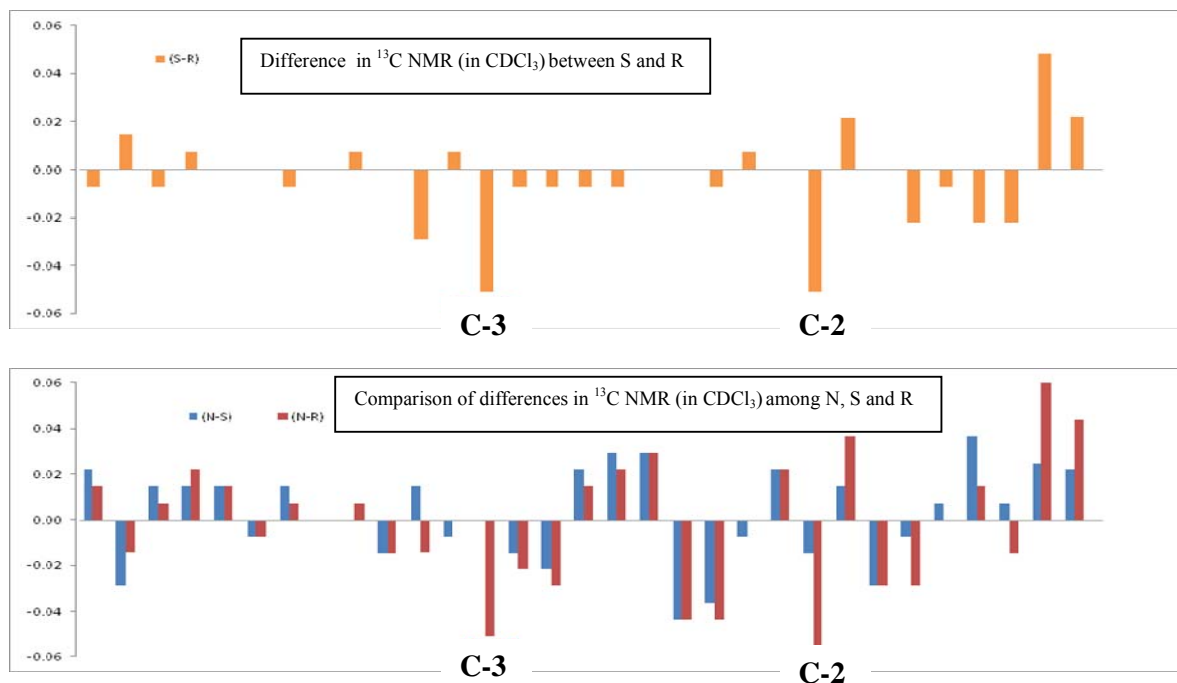

**(S)-2-((2S,3R)-2-((2S,3S)-3-carboxy-2-hydroxy-2-methyl-3-((S,E)-5-methyldec-3-**

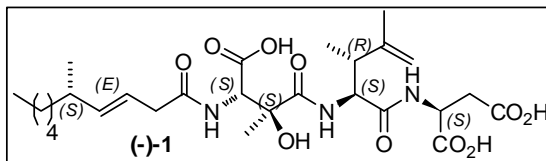

**enamido)propanamido)-3,4-dimethylpent-4-enamido)succinic acid (1) :** To a soln. of **30** (3 mg, 0.005 mmol) in  $\text{ClCH}_2\text{CH}_2\text{Cl}$  (2 mL) was added  $\text{Me}_3\text{SnOH}$  (27 mg, 0.15 mmol) and the reaction mixture was heated at  $80^\circ\text{C}$  for 48 h. ESI mass was checked for crude reaction

mixture and found di-acid as major product. The solvent was evaporated and the residue was extracted with EtOAc, washed with brine, dried over  $\text{Na}_2\text{SO}_4$  and concentrated under reduced pressure to get the crude product which was dissolved in THF/ $\text{H}_2\text{O}$ /MeOH (1 mL/1 mL/ 0.2 mL). To this soln. was added LiOH (10 mg, 0.42 mmol) at  $0^\circ\text{C}$  and it was allowed to stir for 12 h. at room temperature. The reaction mixture was acidified with 3M HCl and extracted with EtOAc, washed with brine, dried over  $\text{Na}_2\text{SO}_4$  and concentrated under reduced pressure to get the crude product which was purified by prep. HPLC to afford compound **1** (1.3 mg, 46%) as a colourless oil.

$R_f = 0.1$  (silica, 20%  $\text{CH}_3\text{OH}/\text{CH}_2\text{Cl}_2$ );  $[\alpha]_D^{25} = -20.0$  ( $c = 0.1$ ,  $\text{CH}_3\text{OH}$ ); IR (thin film)  $\nu_{\text{max}} = 2927, 2855, 1733, 1656, 1521, 1195 \text{ cm}^{-1}$ ;  $^1\text{H}$  NMR ( $\text{MeOD}-d_4$ , 500 MHz)  $\delta$  5.52-5.0 (2H, m), 4.61-4.6 (2H, m), 4.43 (1H, d,  $J = 6.9 \text{ Hz}$ ), 2.97 (2H, d,  $J = 6.9 \text{ Hz}$ ), 2.81 (2H, t,  $J = 7.0 \text{ Hz}$ ), 2.67-2.65 (2H, m), 2.13 (1H, m), 1.76 (3H, s), 1.44 (3H, s), 1.29 (8H, br), 1.07 (3H, d,  $J = 6.9 \text{ Hz}$ ), 0.97 (3H, d,  $J = 6.9 \text{ Hz}$ ), 0.89 (3H, t,  $J = 7.0 \text{ Hz}$ );  $^{13}\text{C}$  NMR ( $\text{CDCl}_3$ , 125 MHz)  $\delta$  176.35, 174.13, 173.95, 173.59, 173.28, 172.66, 147.01, 142.79, 121.74, 113.38, 76.51, 57.12, 50.33, 44.33, 40.63, 38.09, 38.00, 36.83, 33.15, 28.10, 24.45, 23.67, 20.95, 20.45, 15.55, 14.43; HRMS (ESI):  $m/z$  calcd for  $\text{C}_{27}\text{H}_{42}\text{O}_{10}\text{N}_3[\text{M}-\text{H}]$  568.2876, found 568.2868.

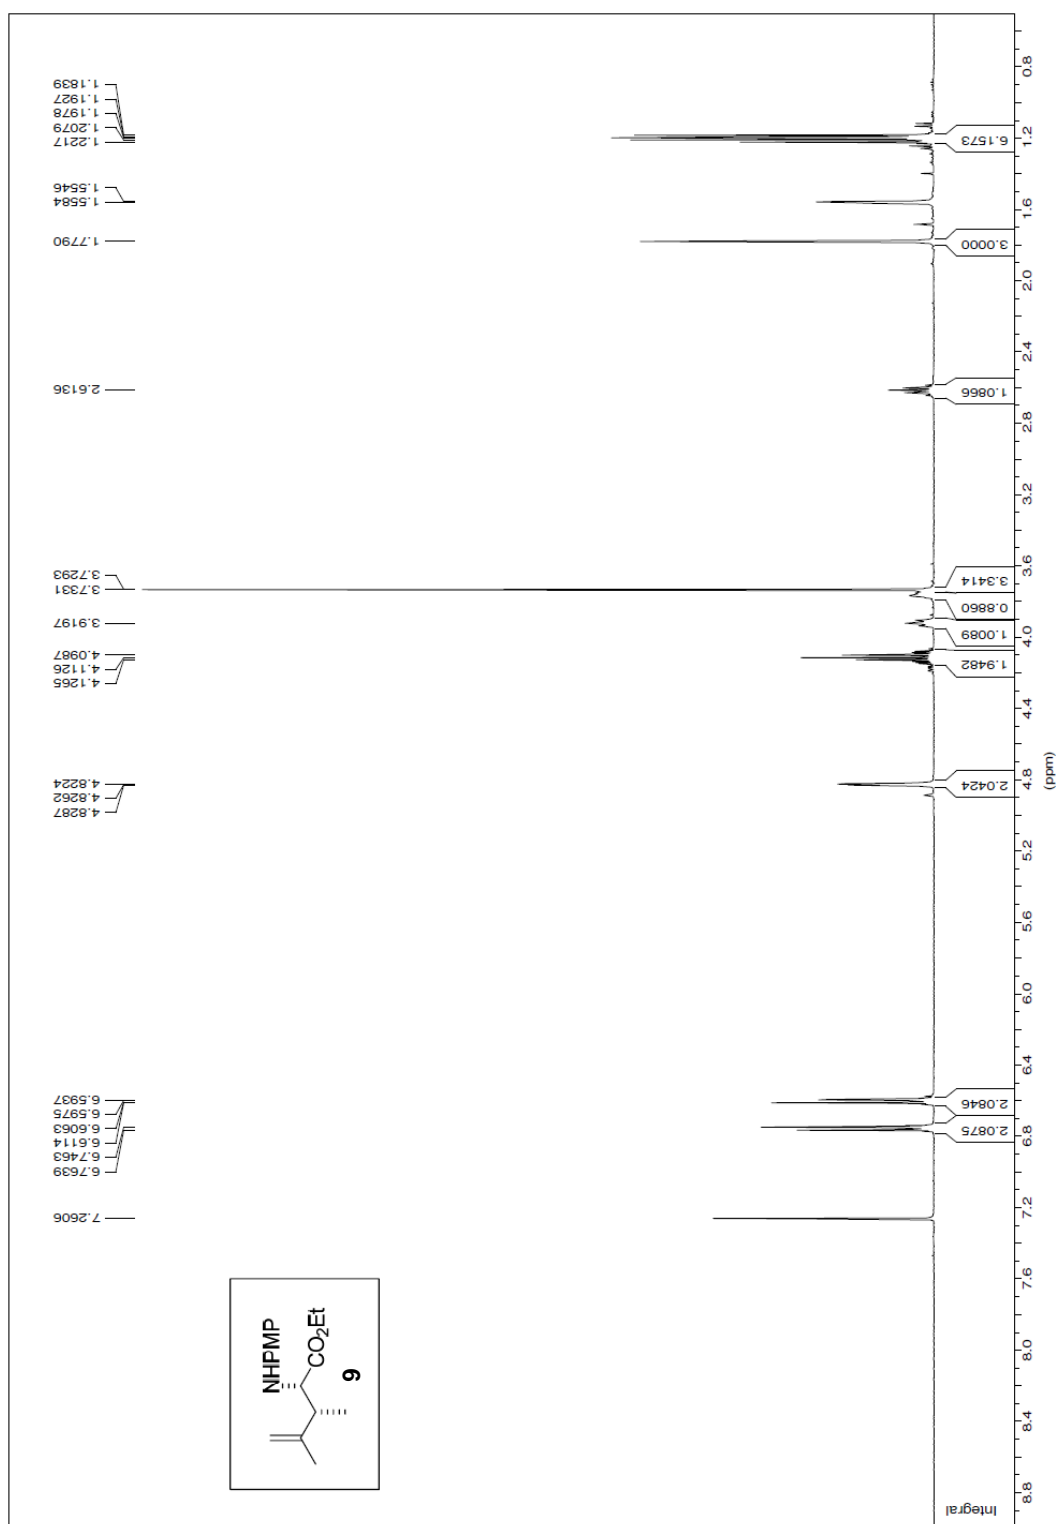

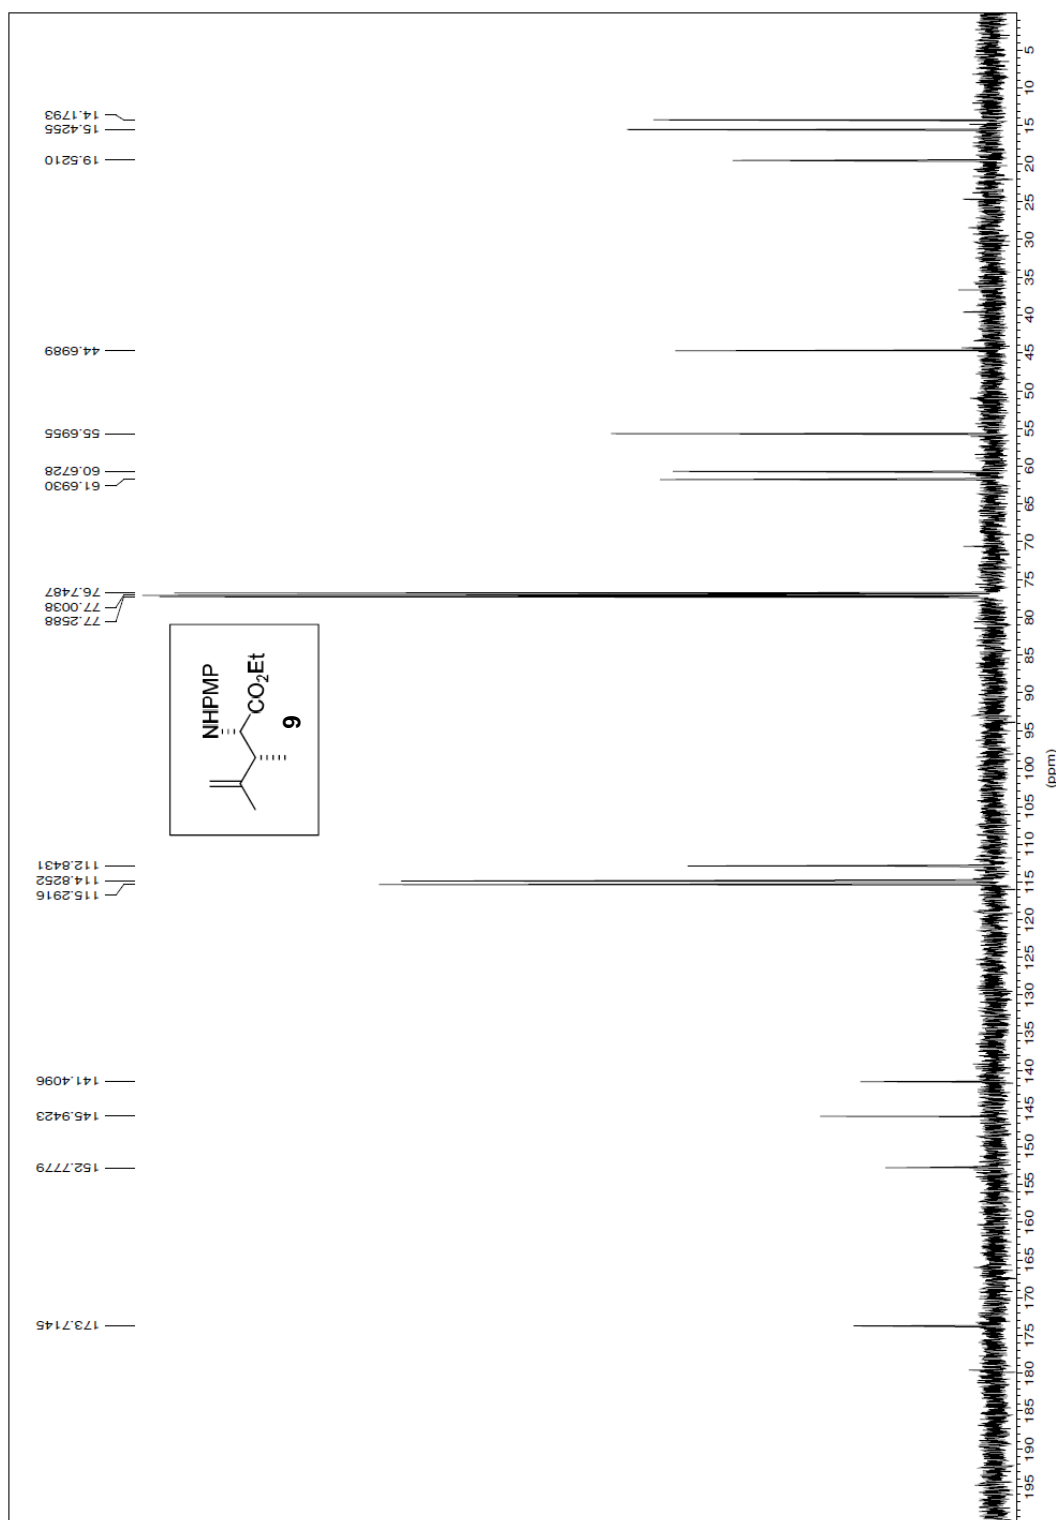

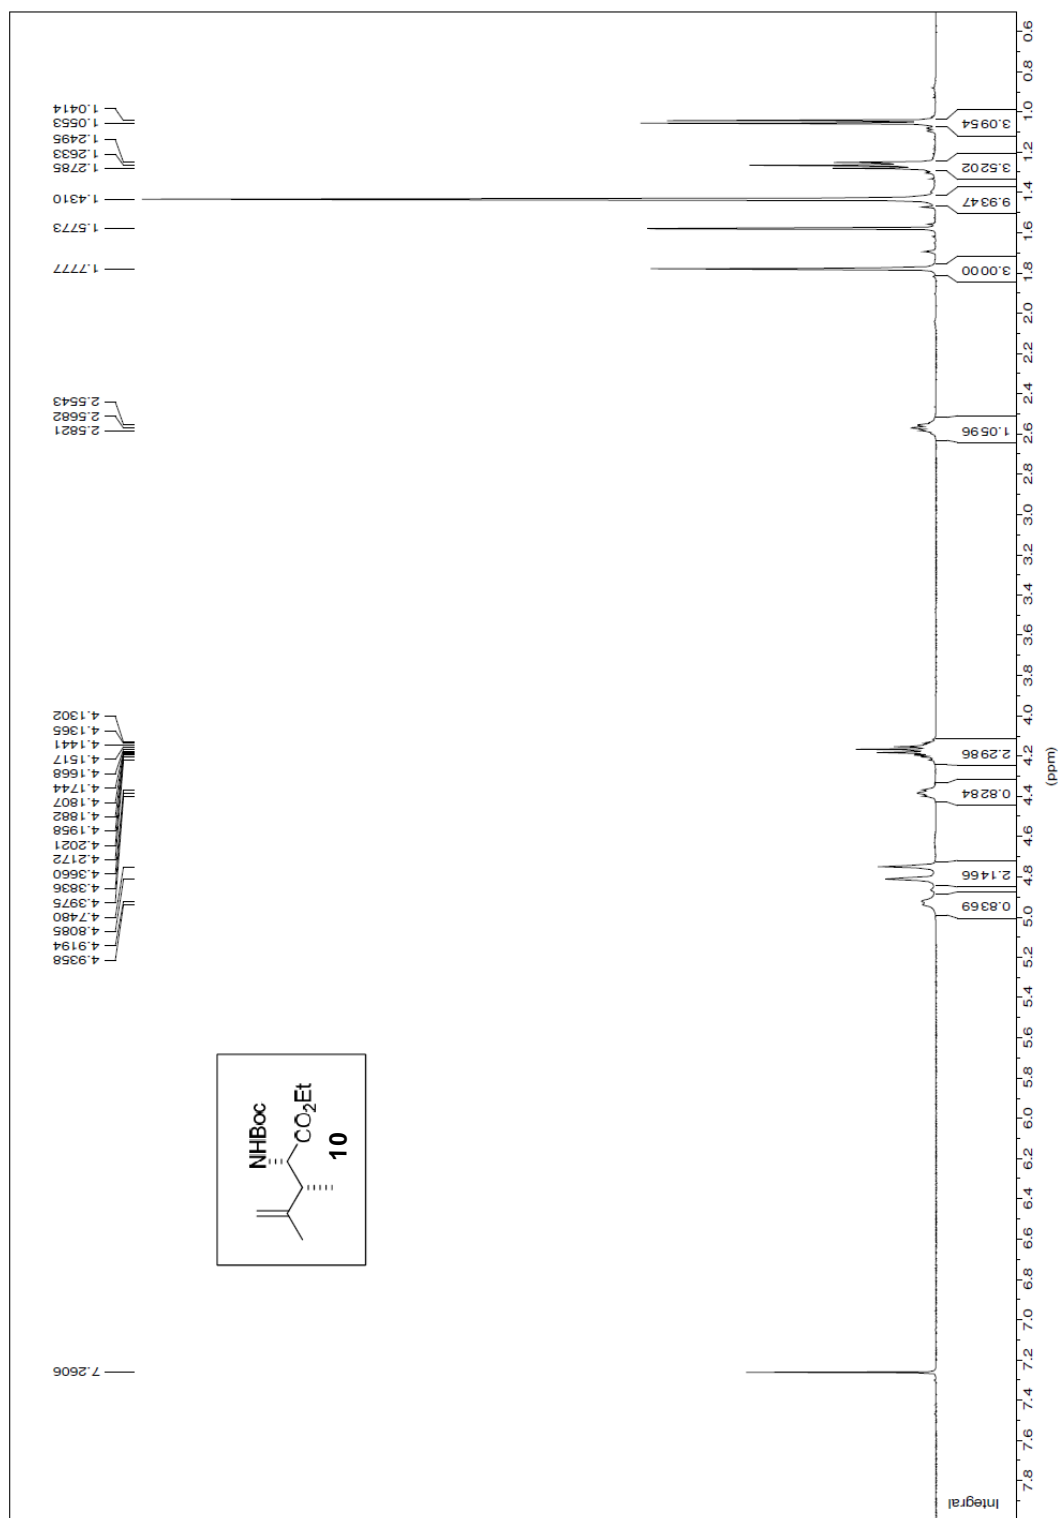

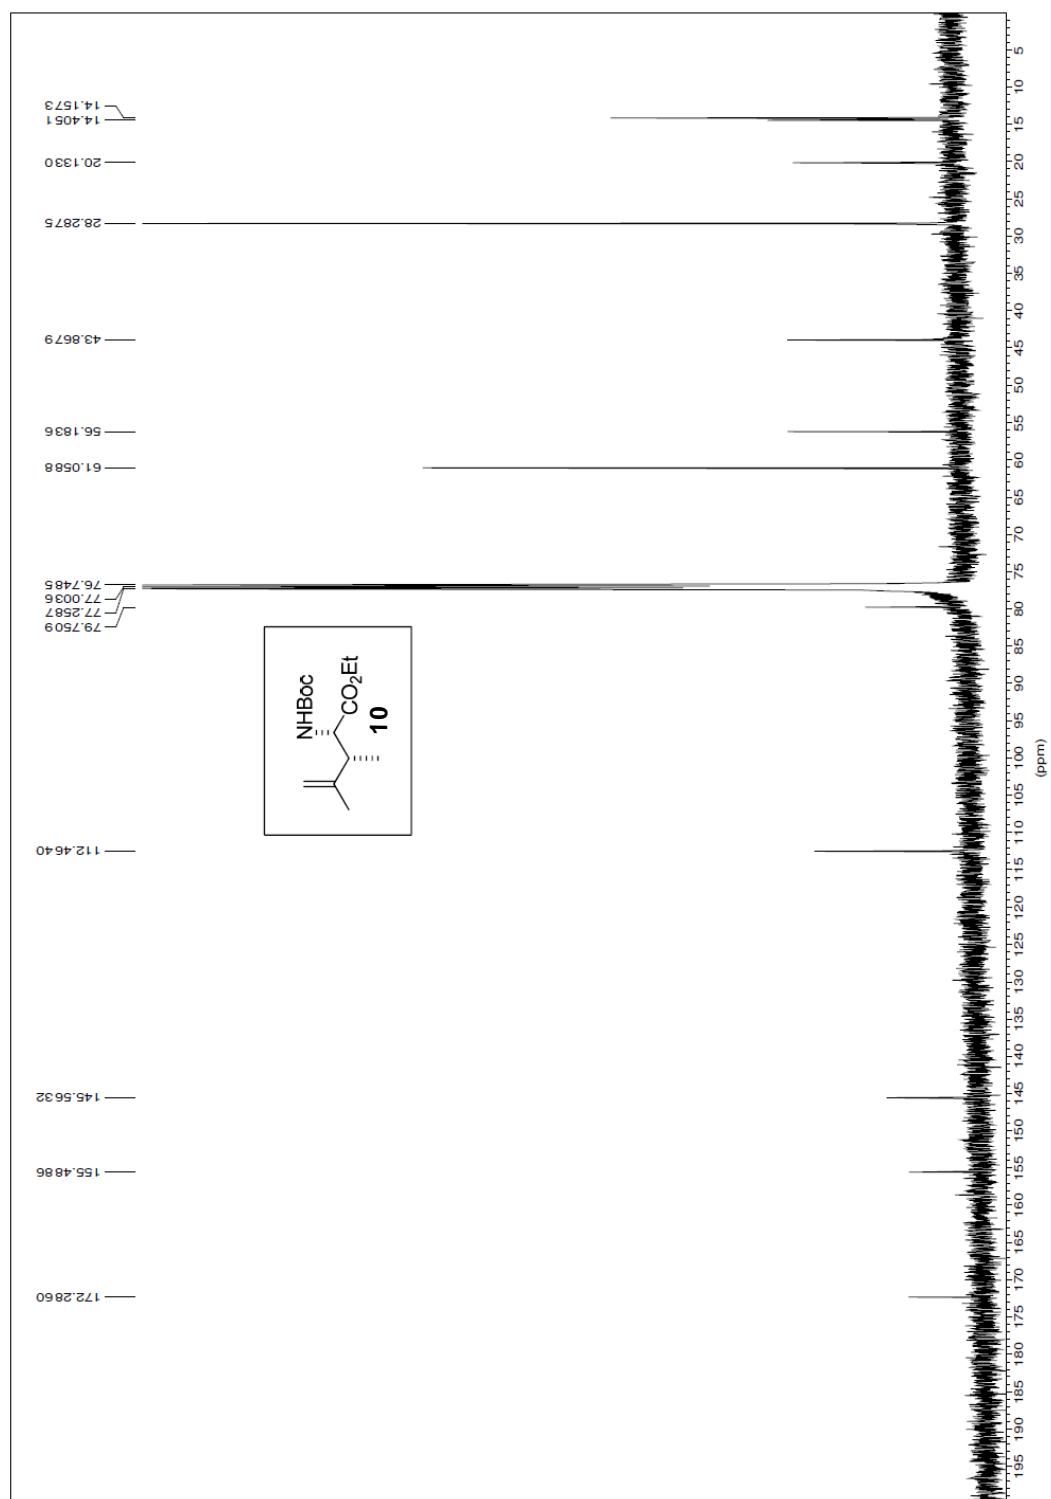

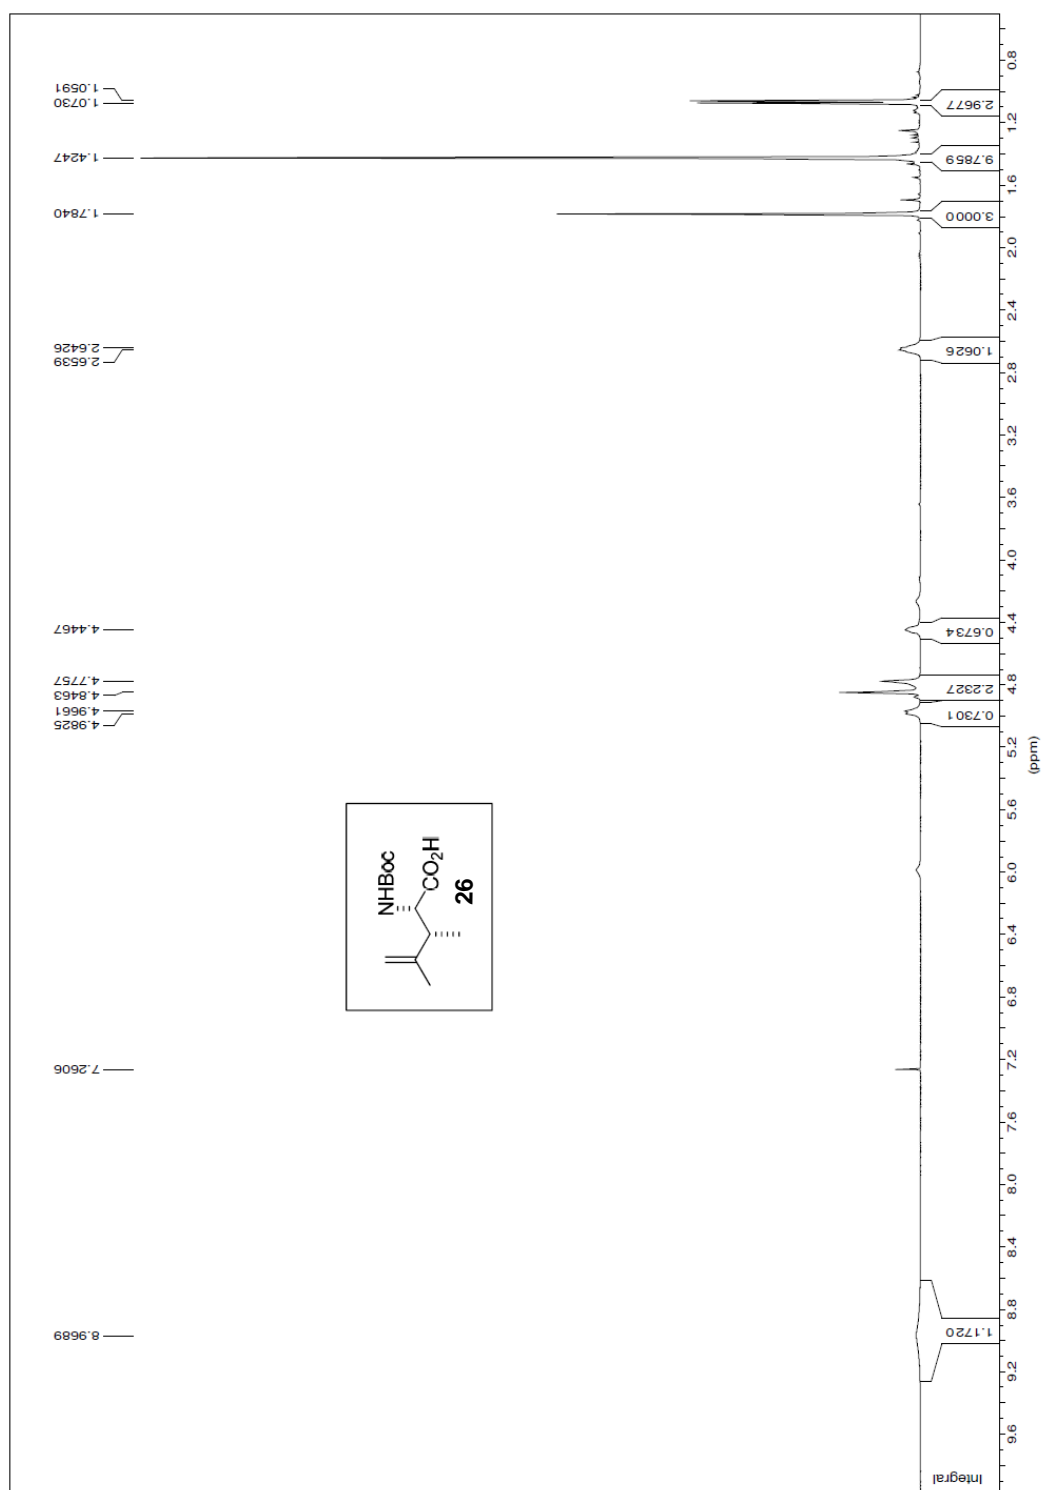



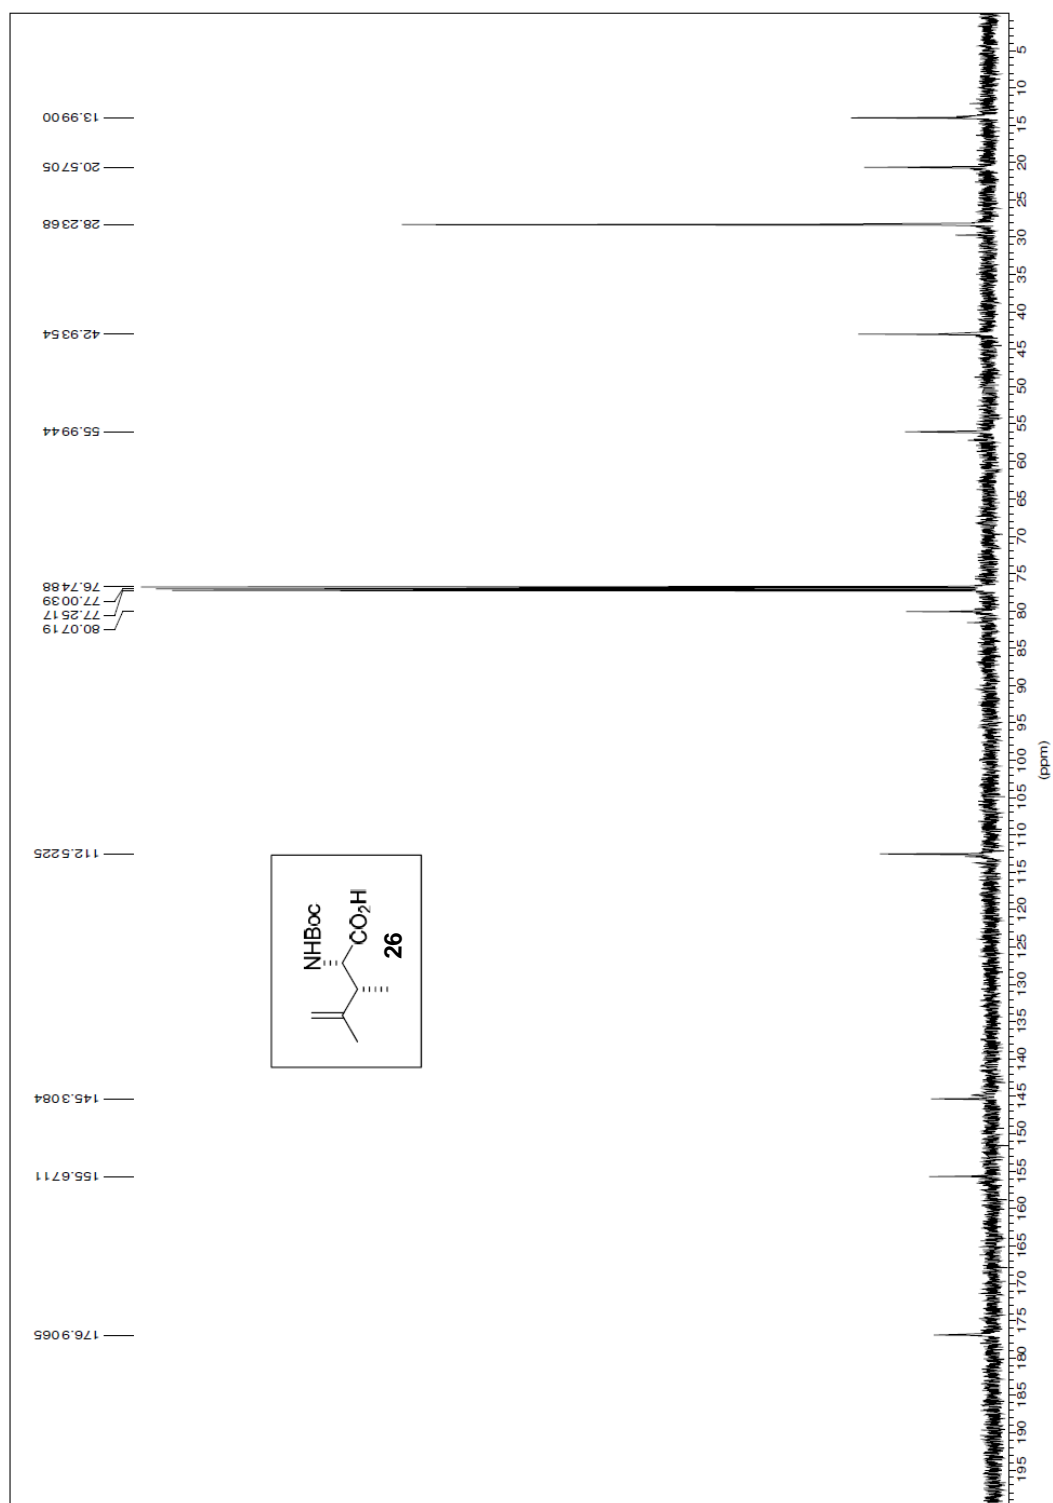

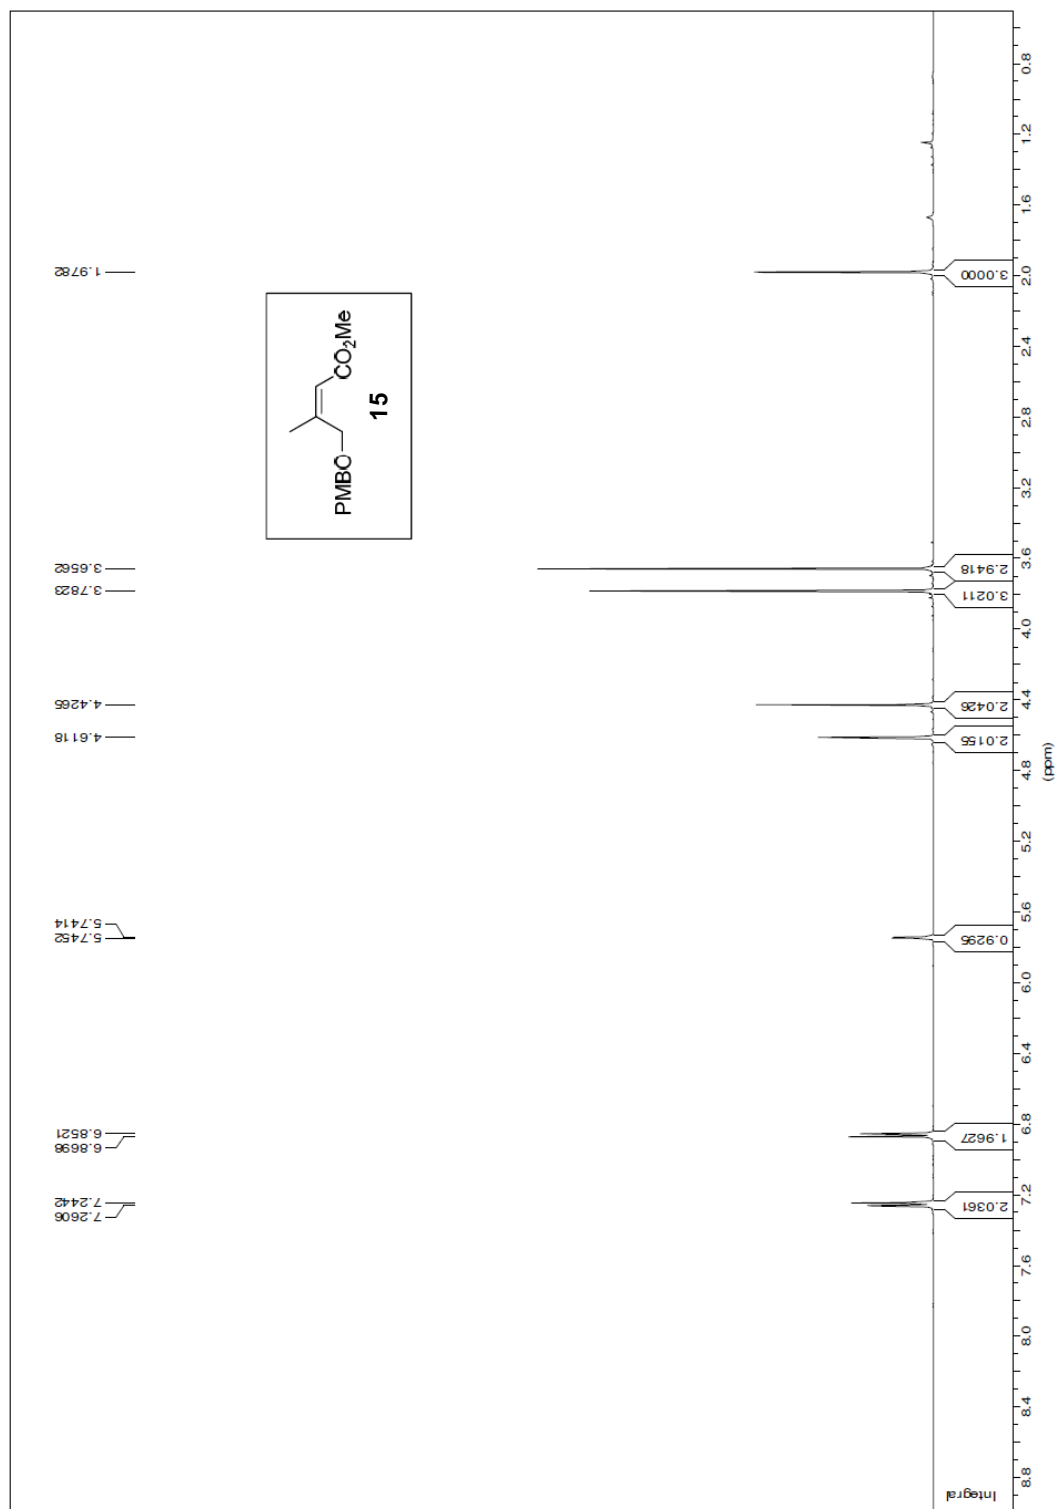

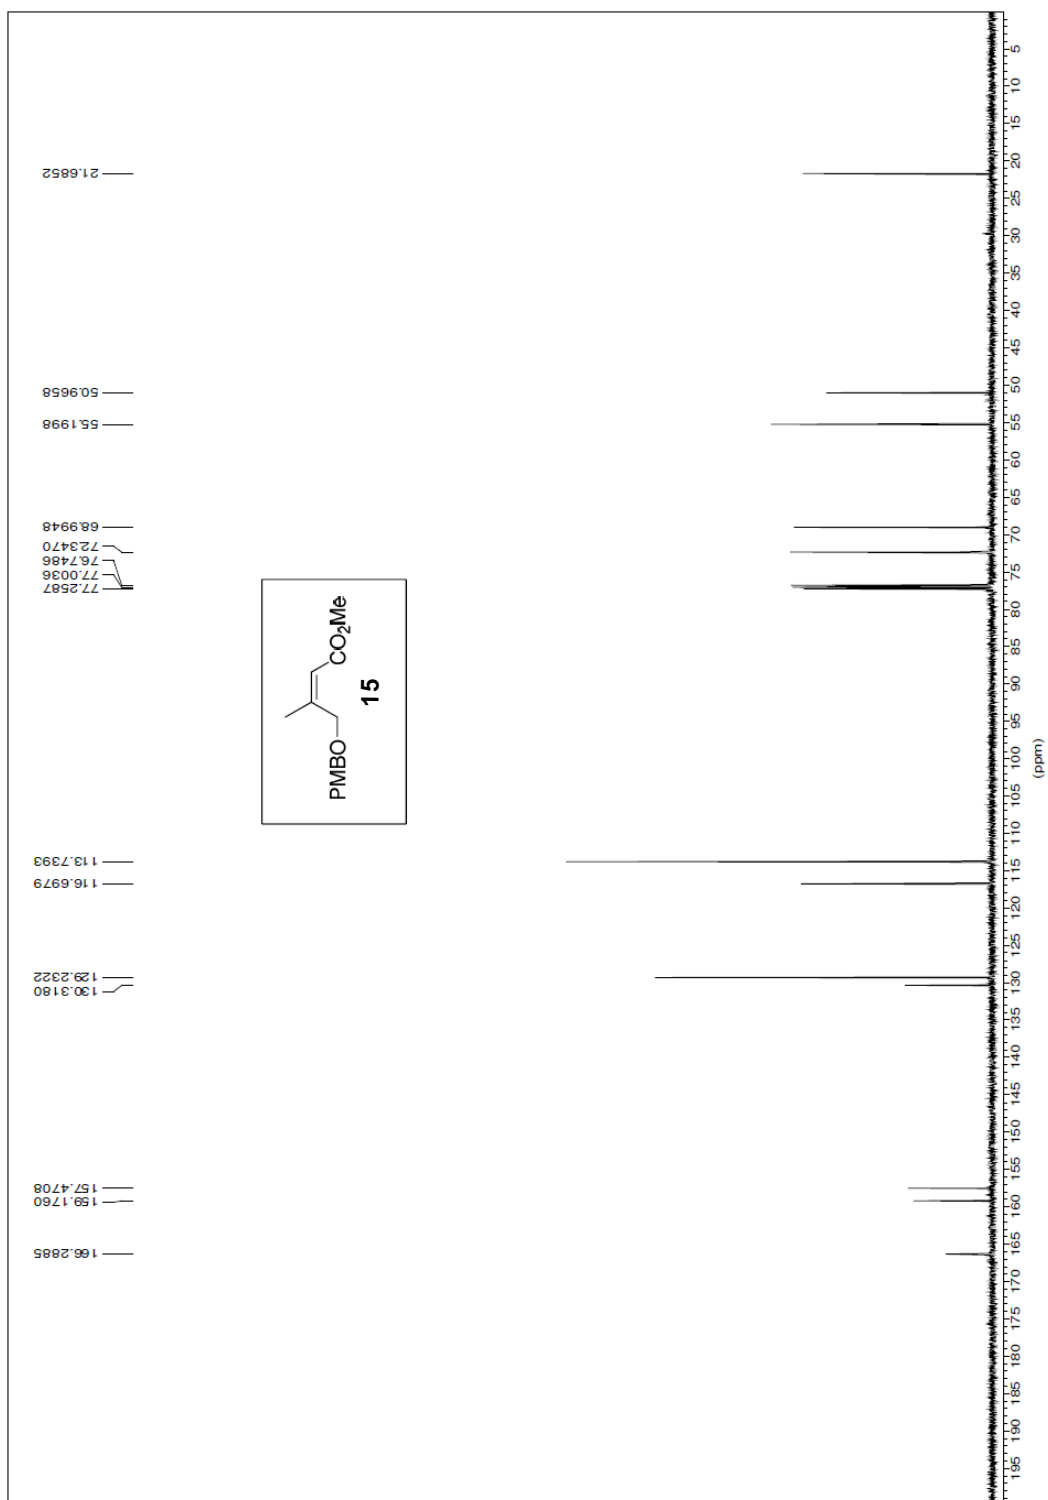

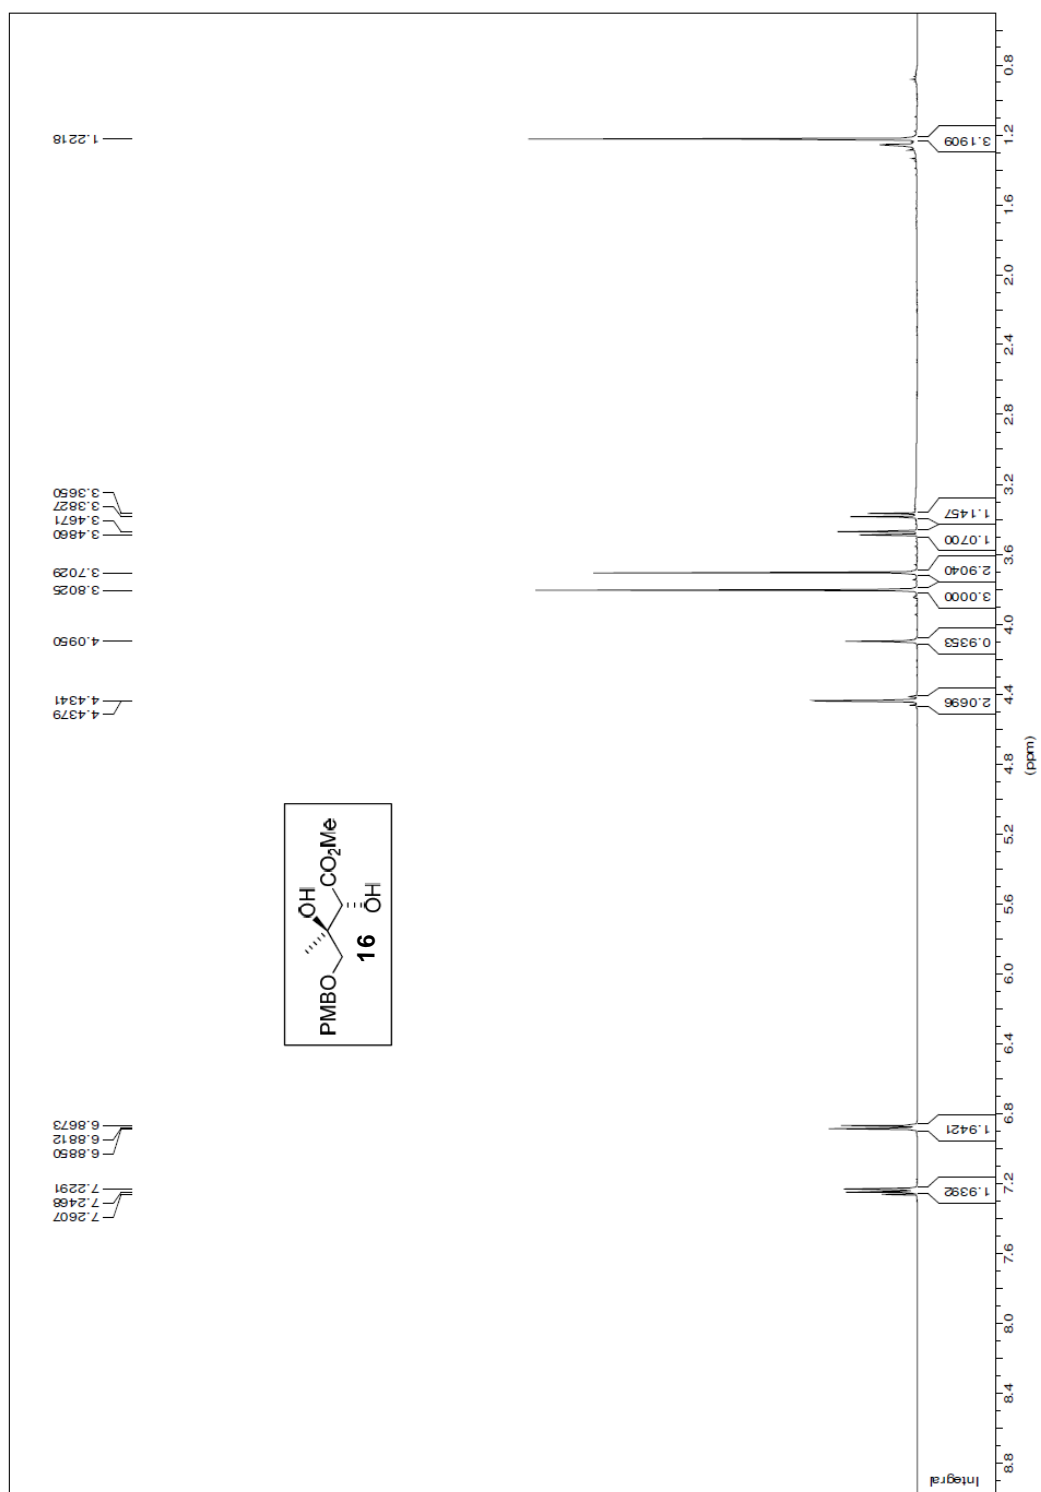

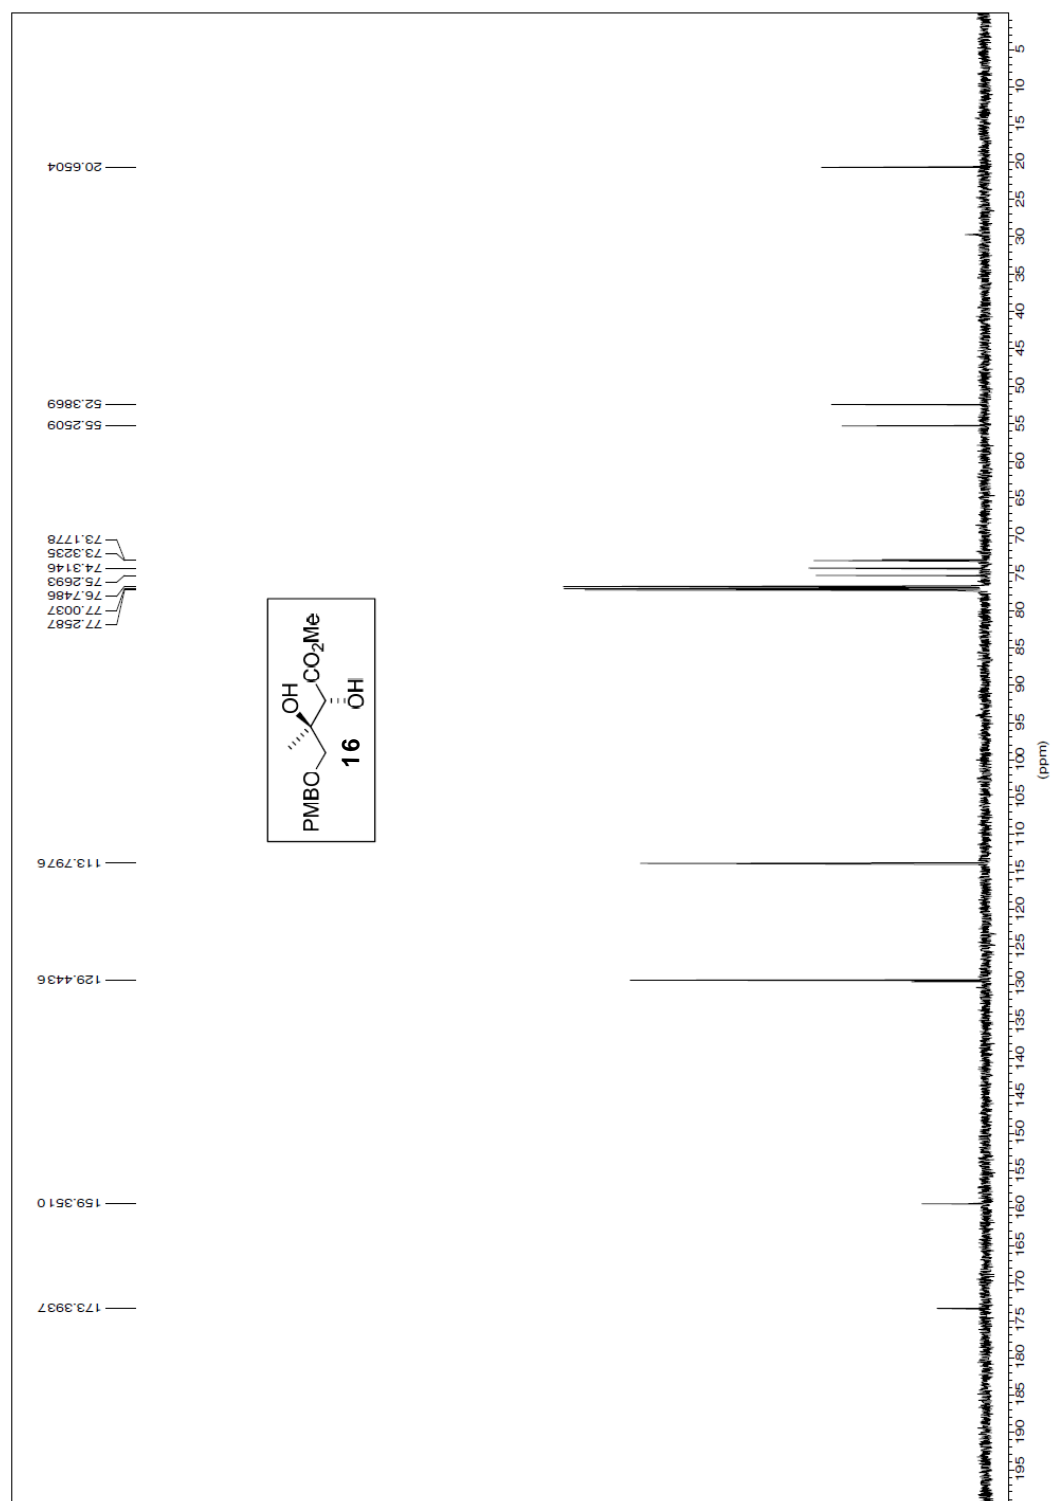

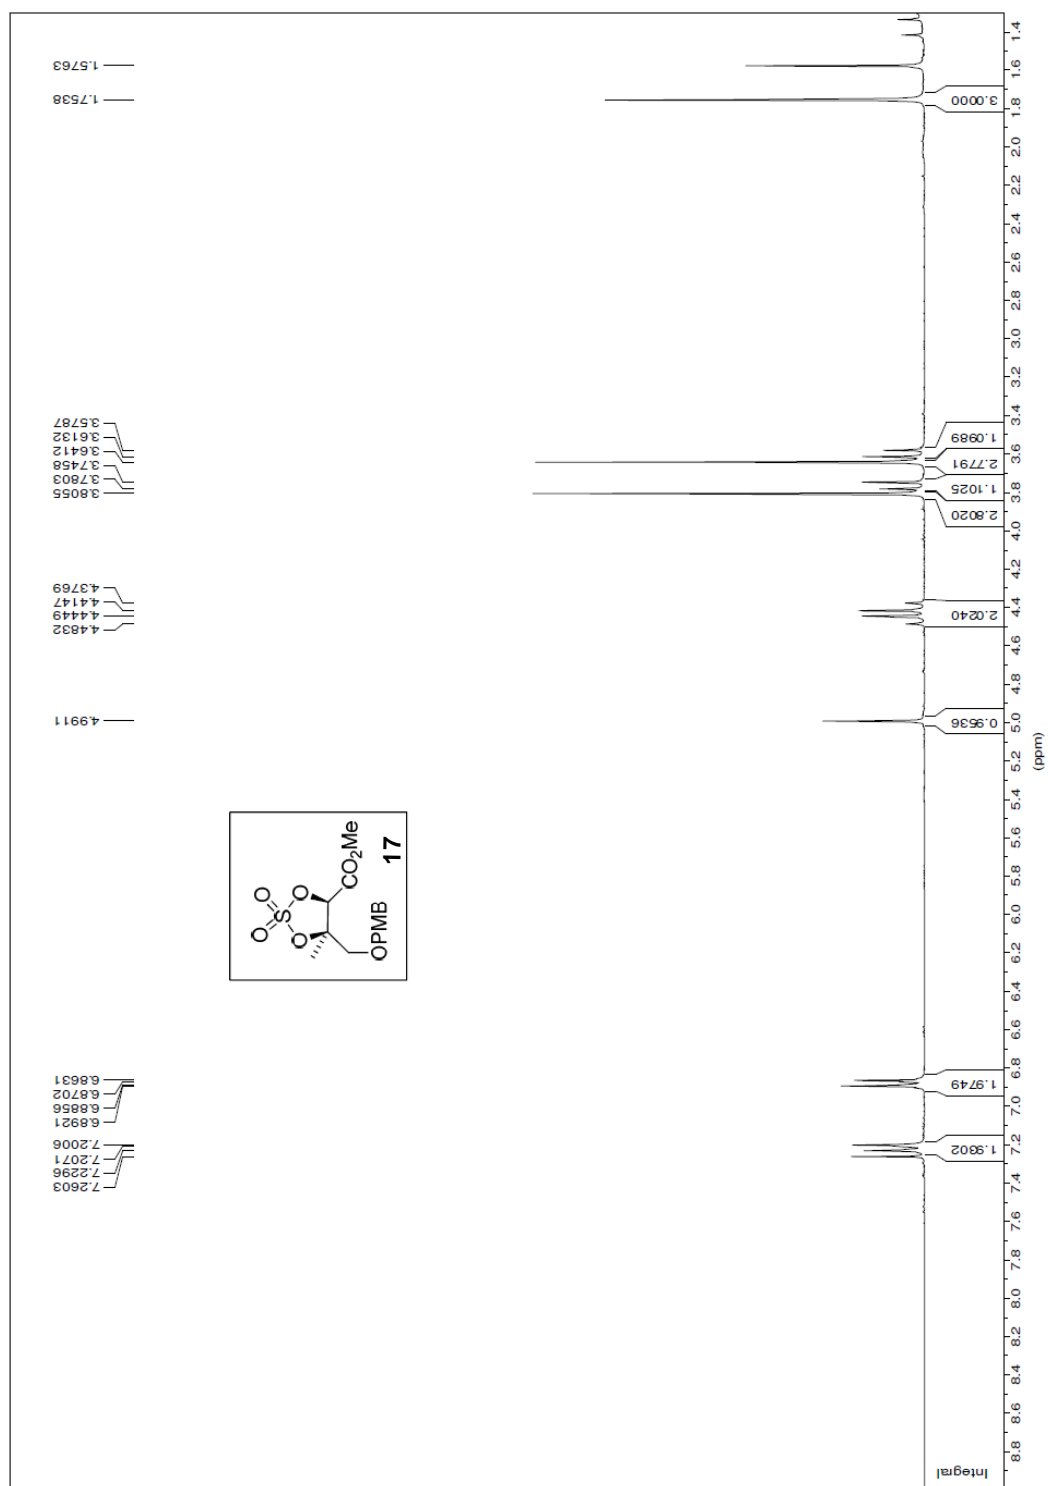

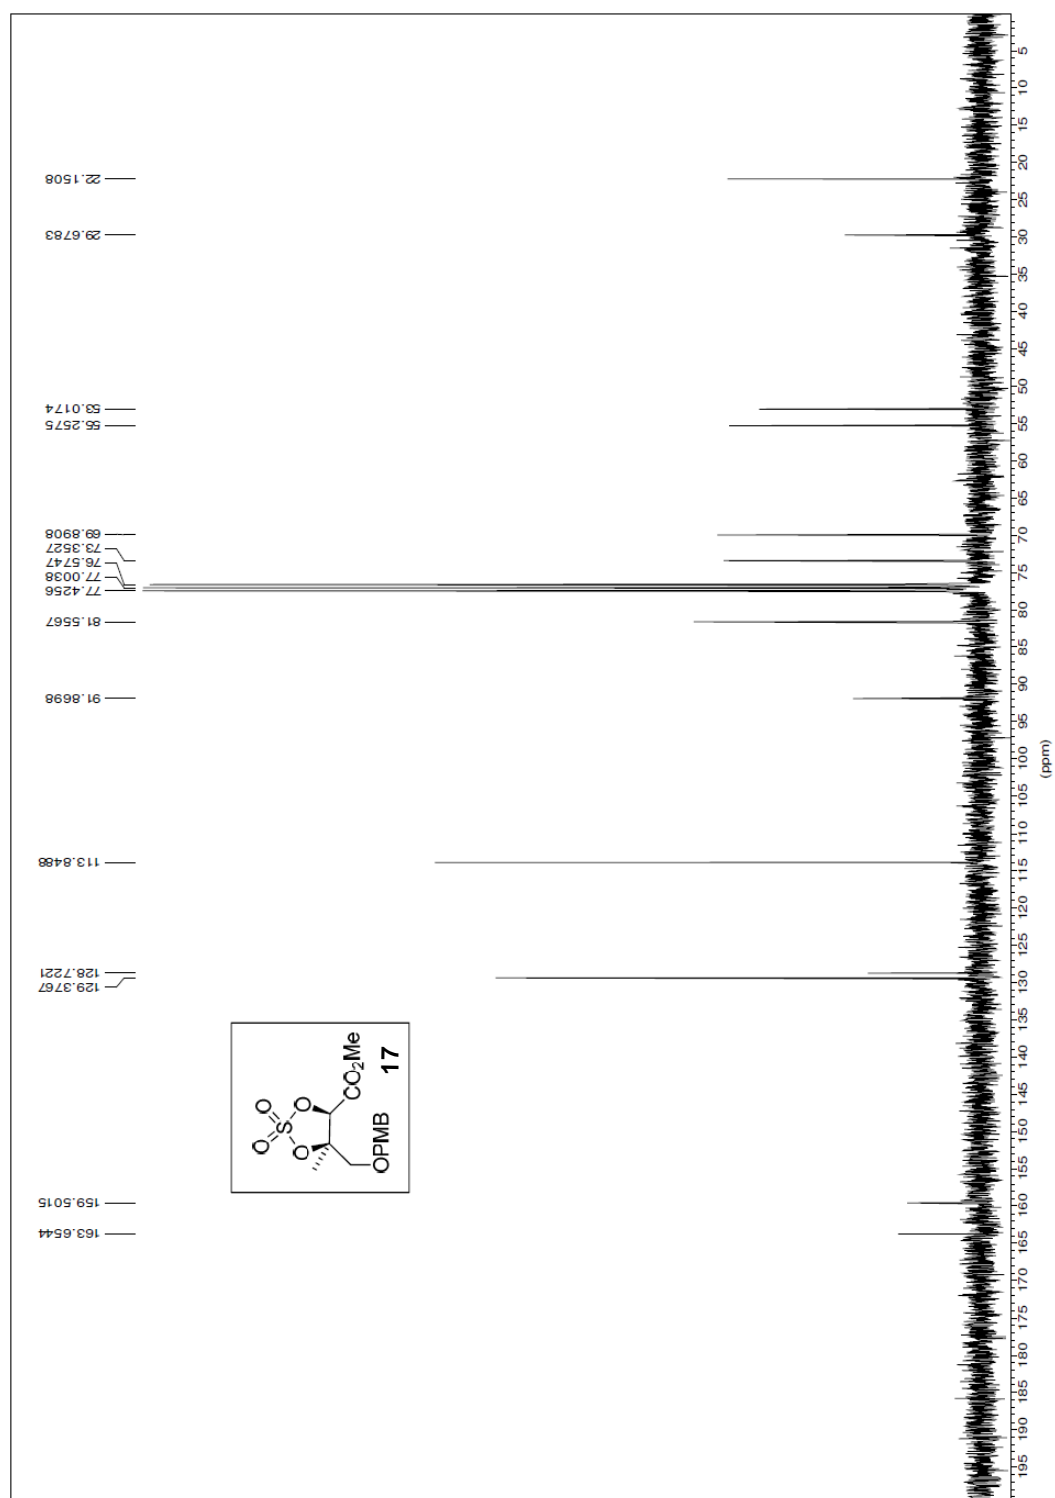

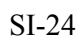



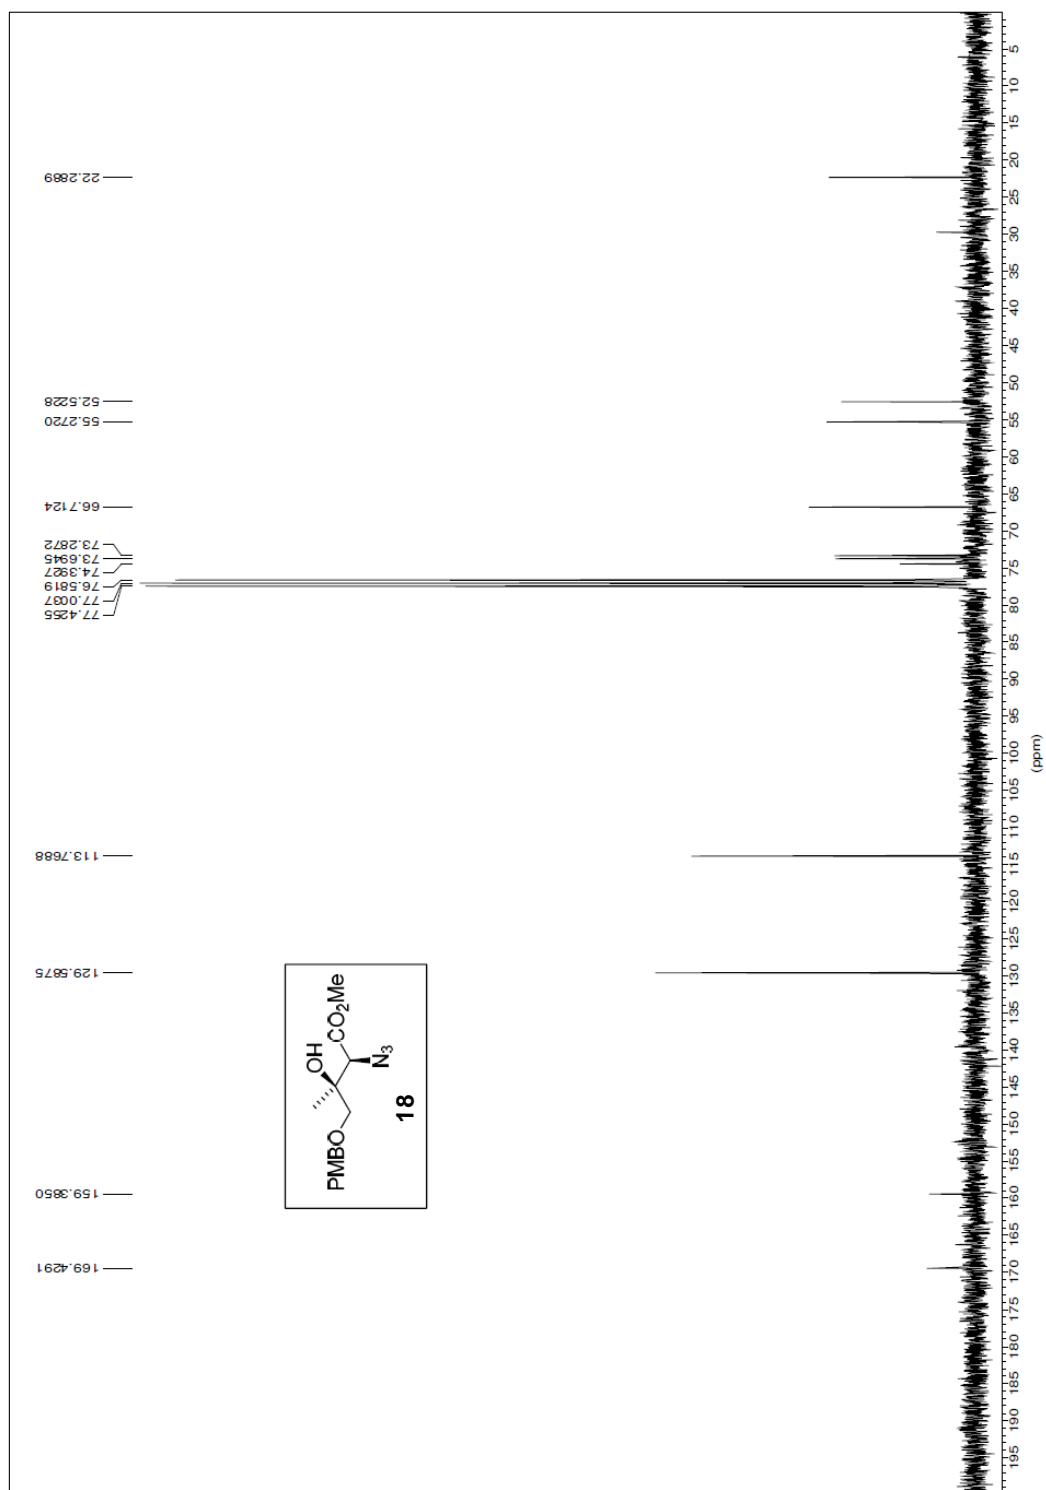

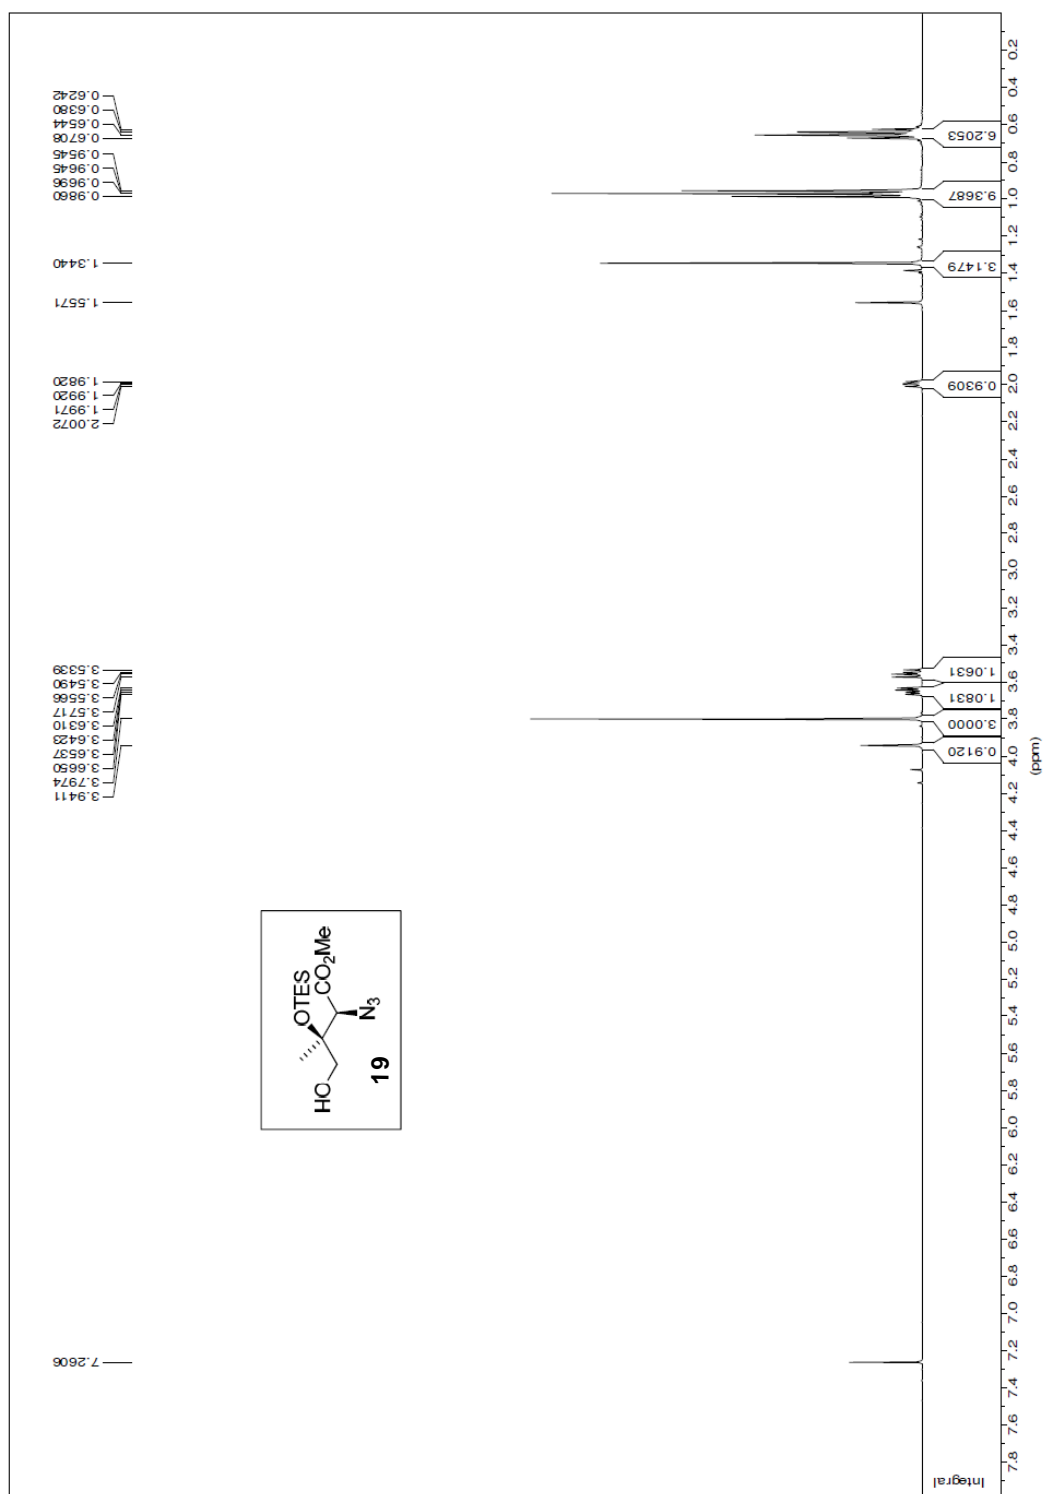

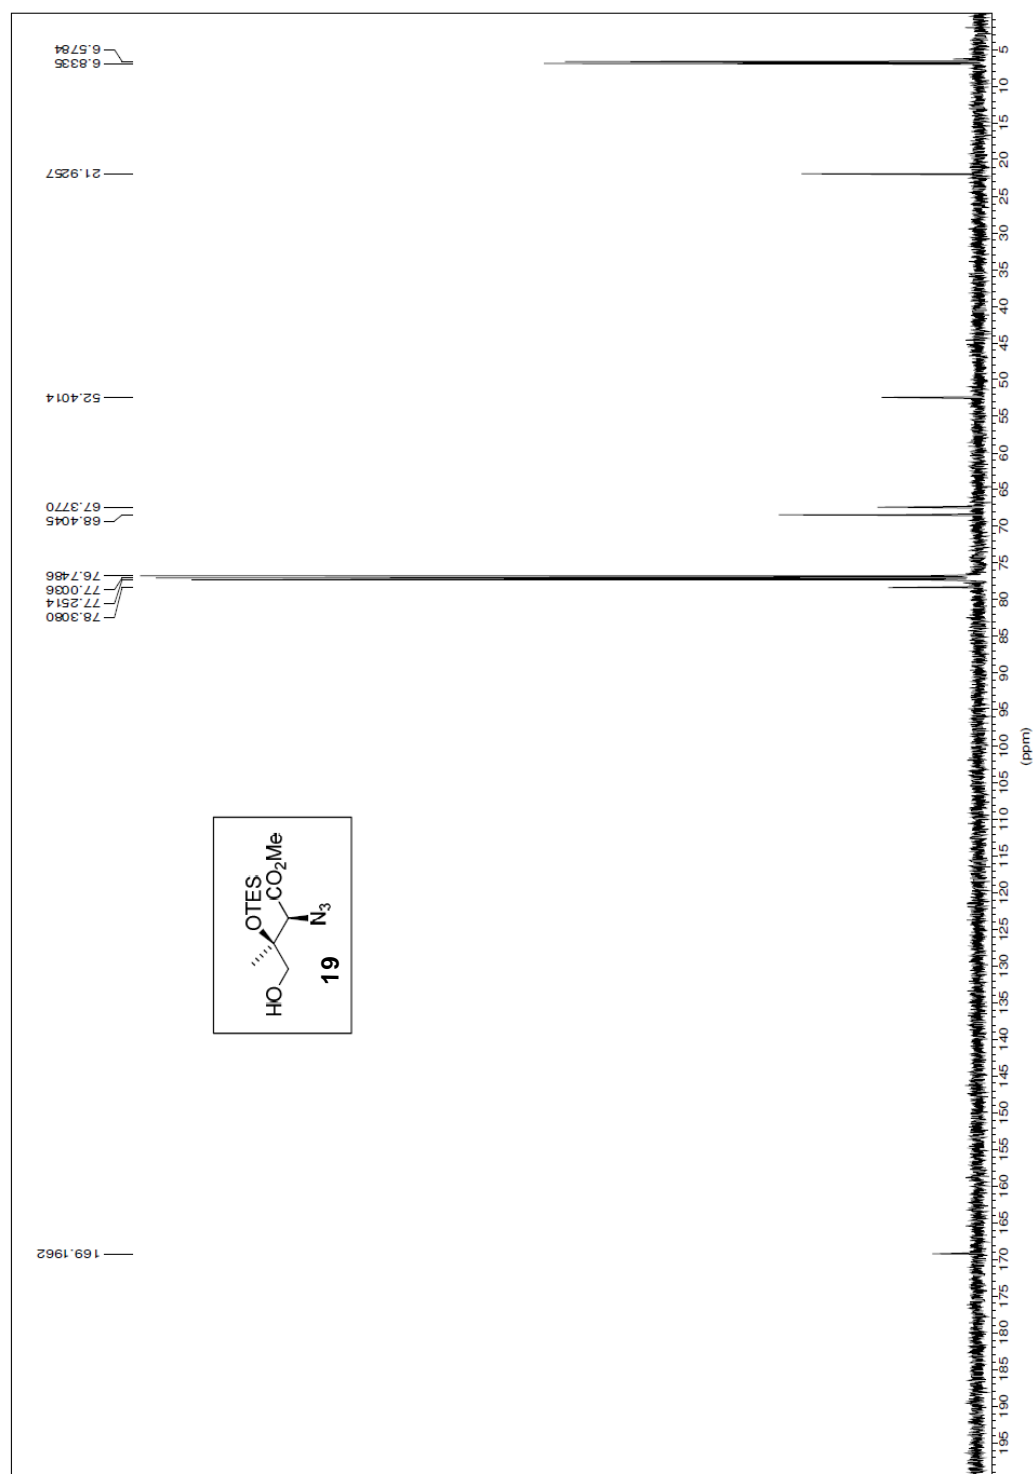

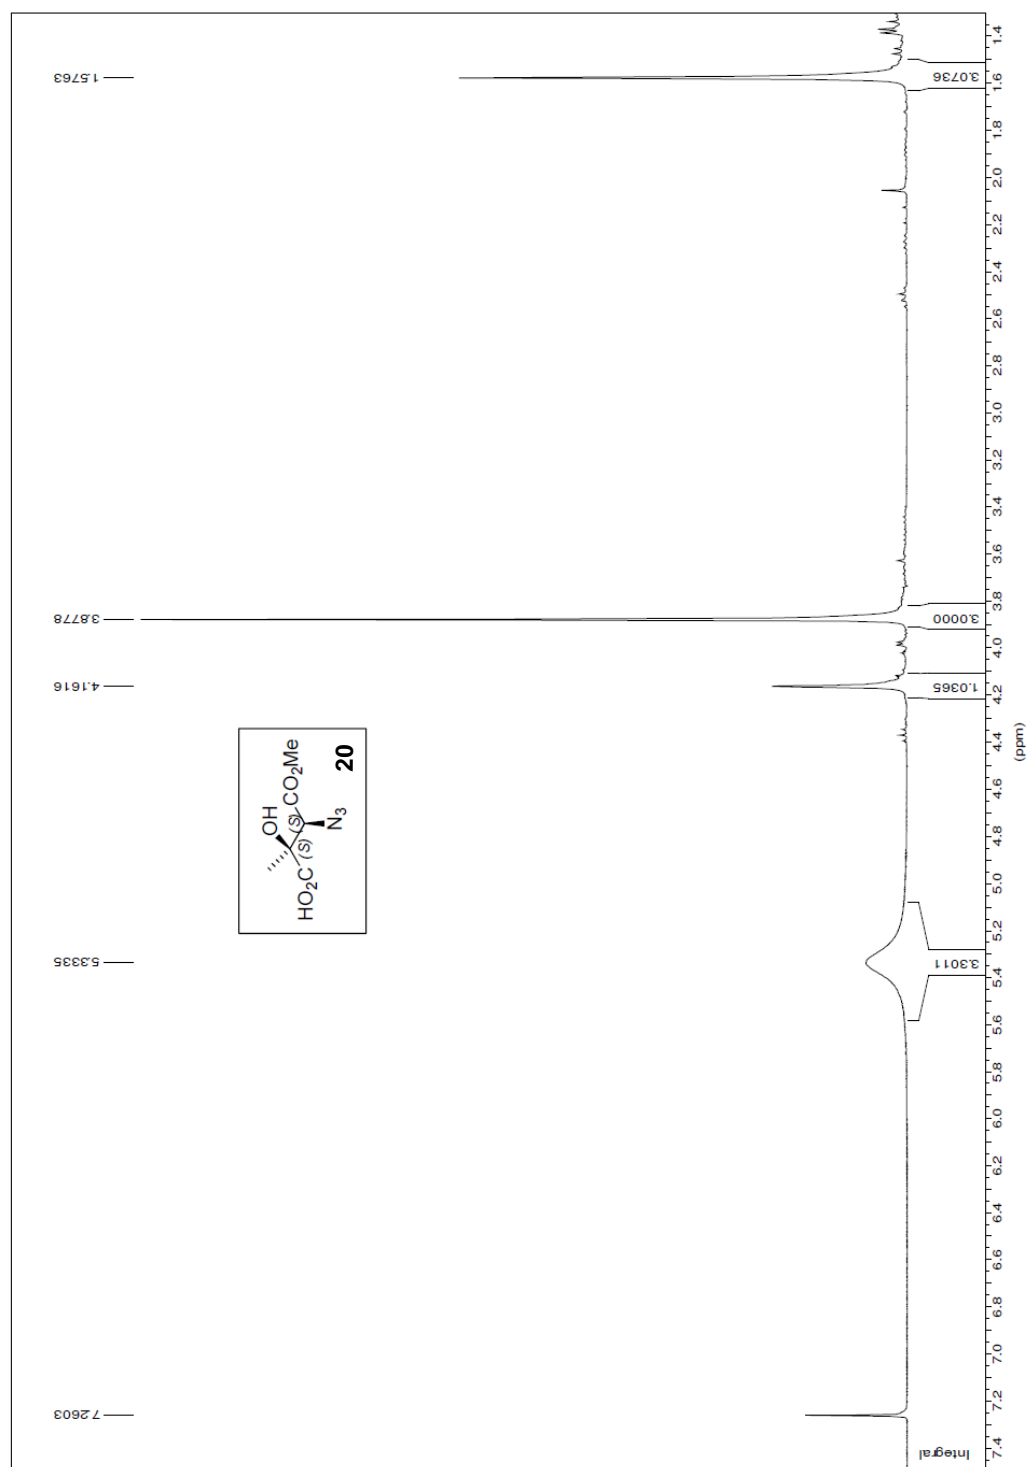

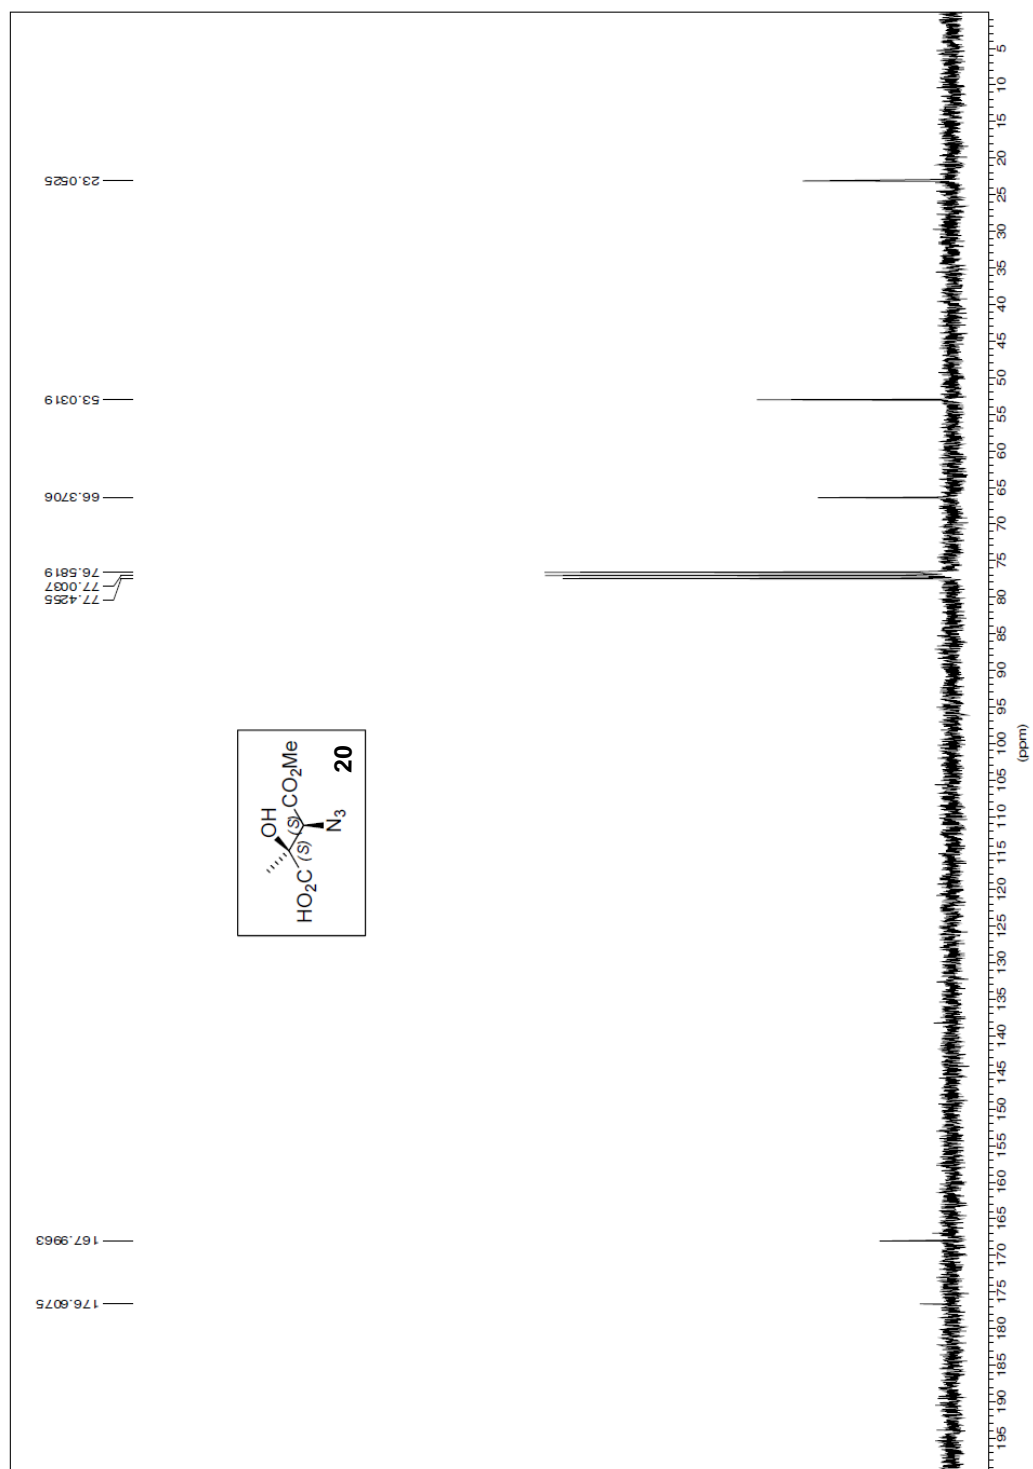

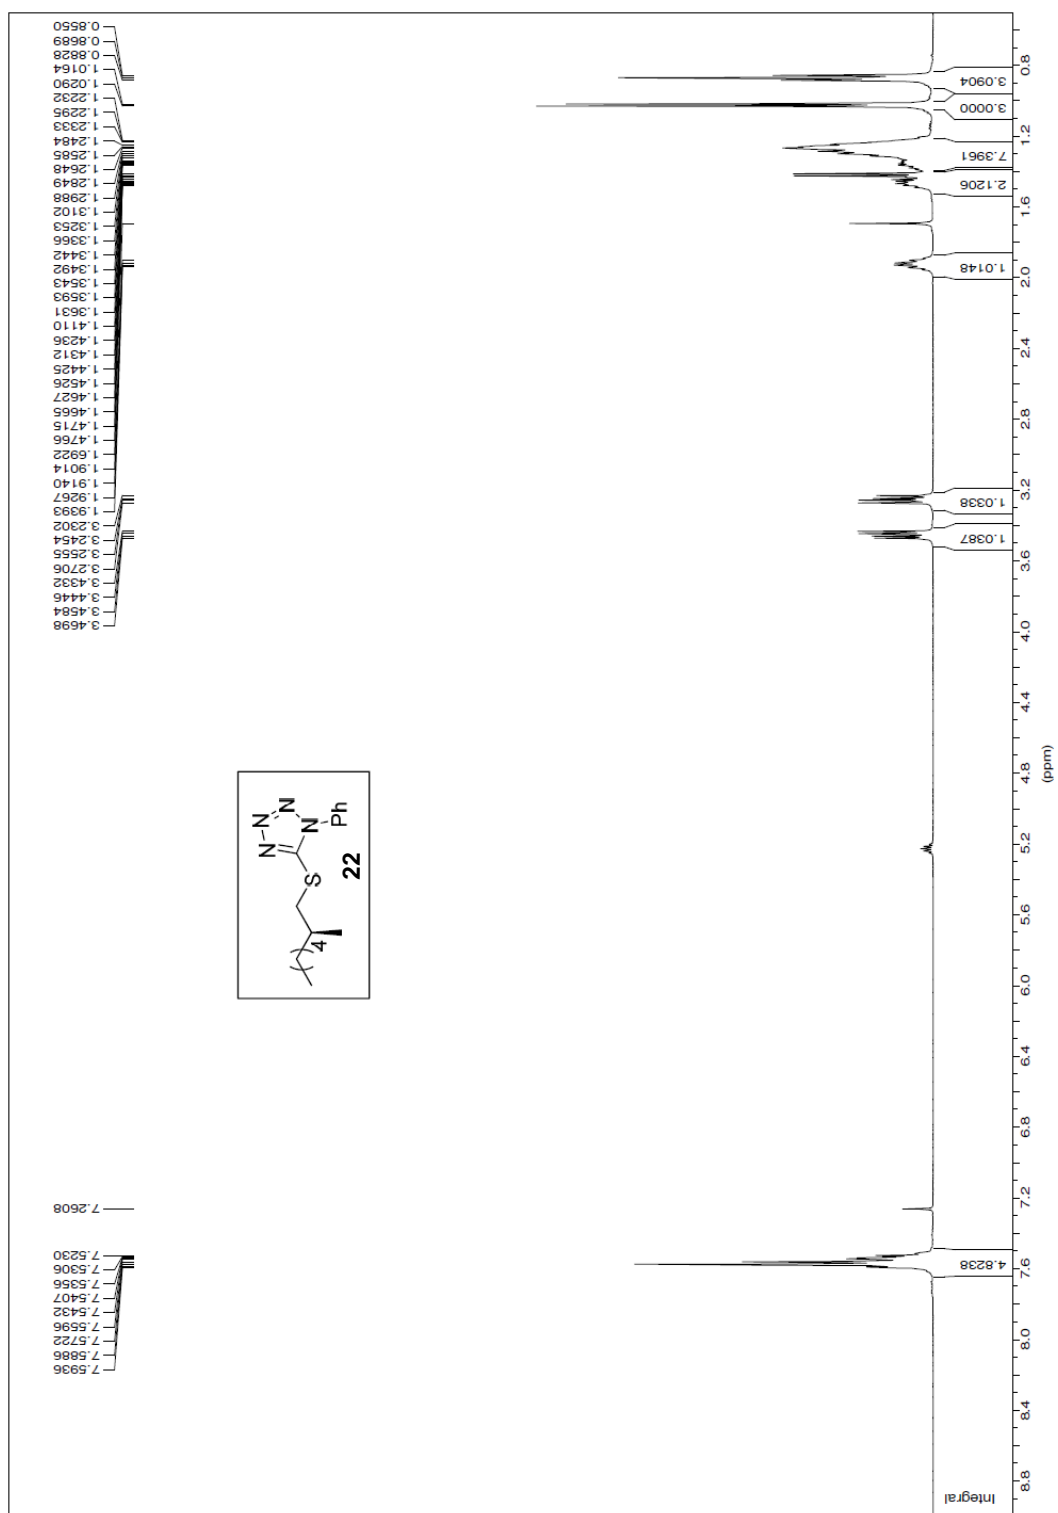

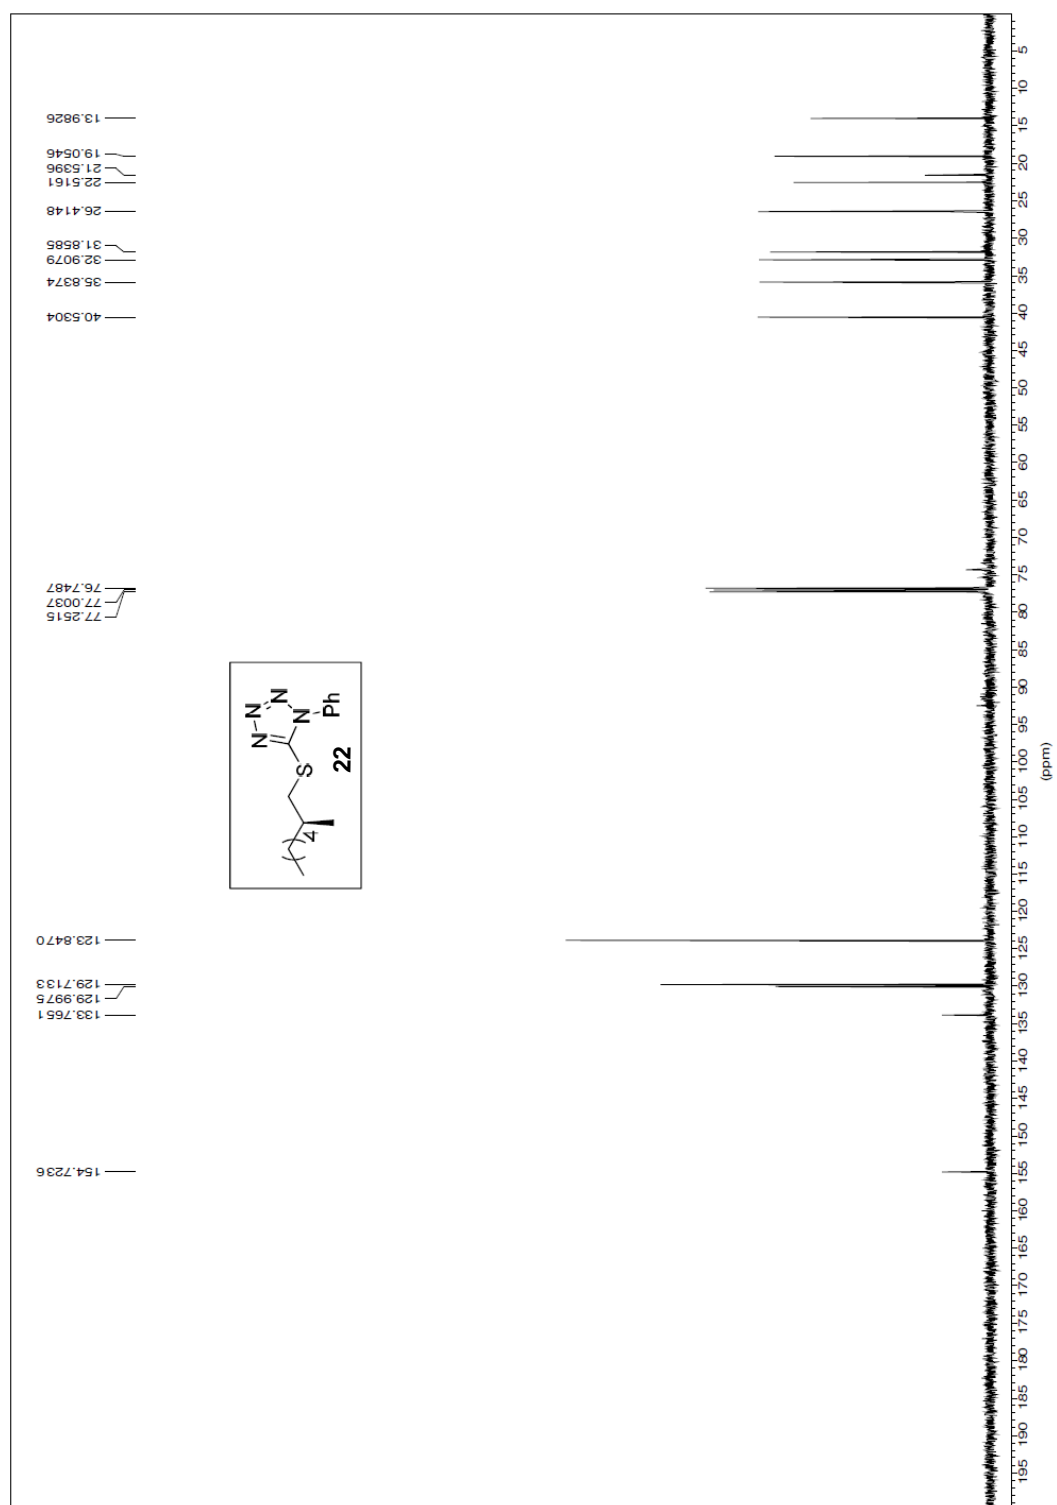

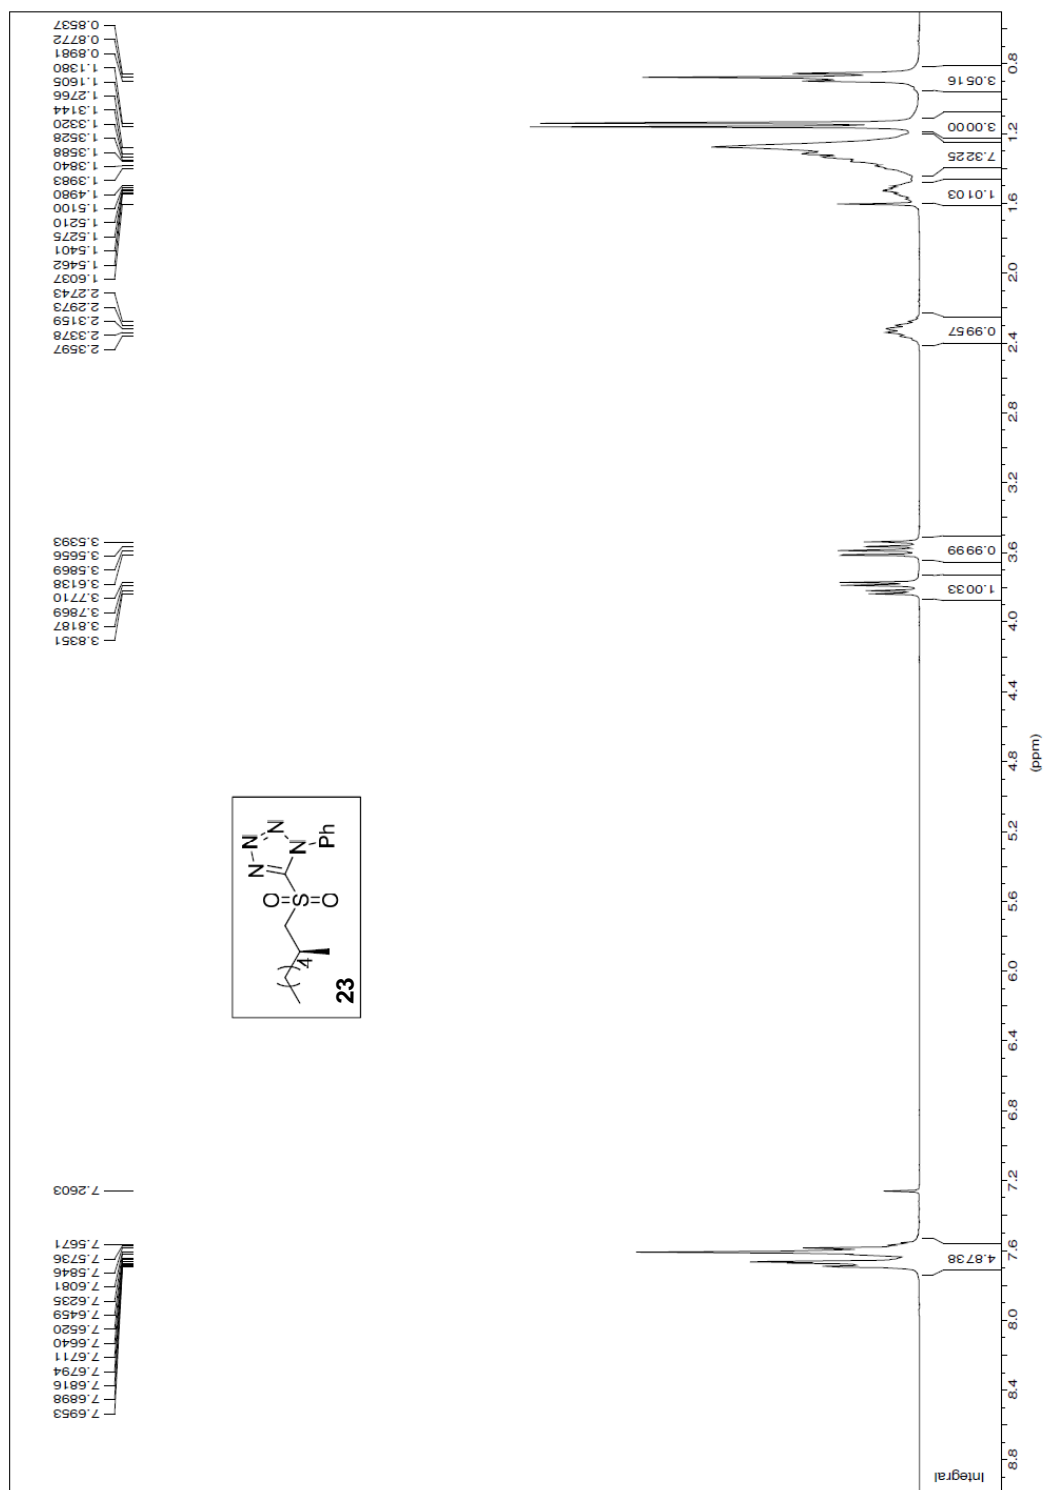



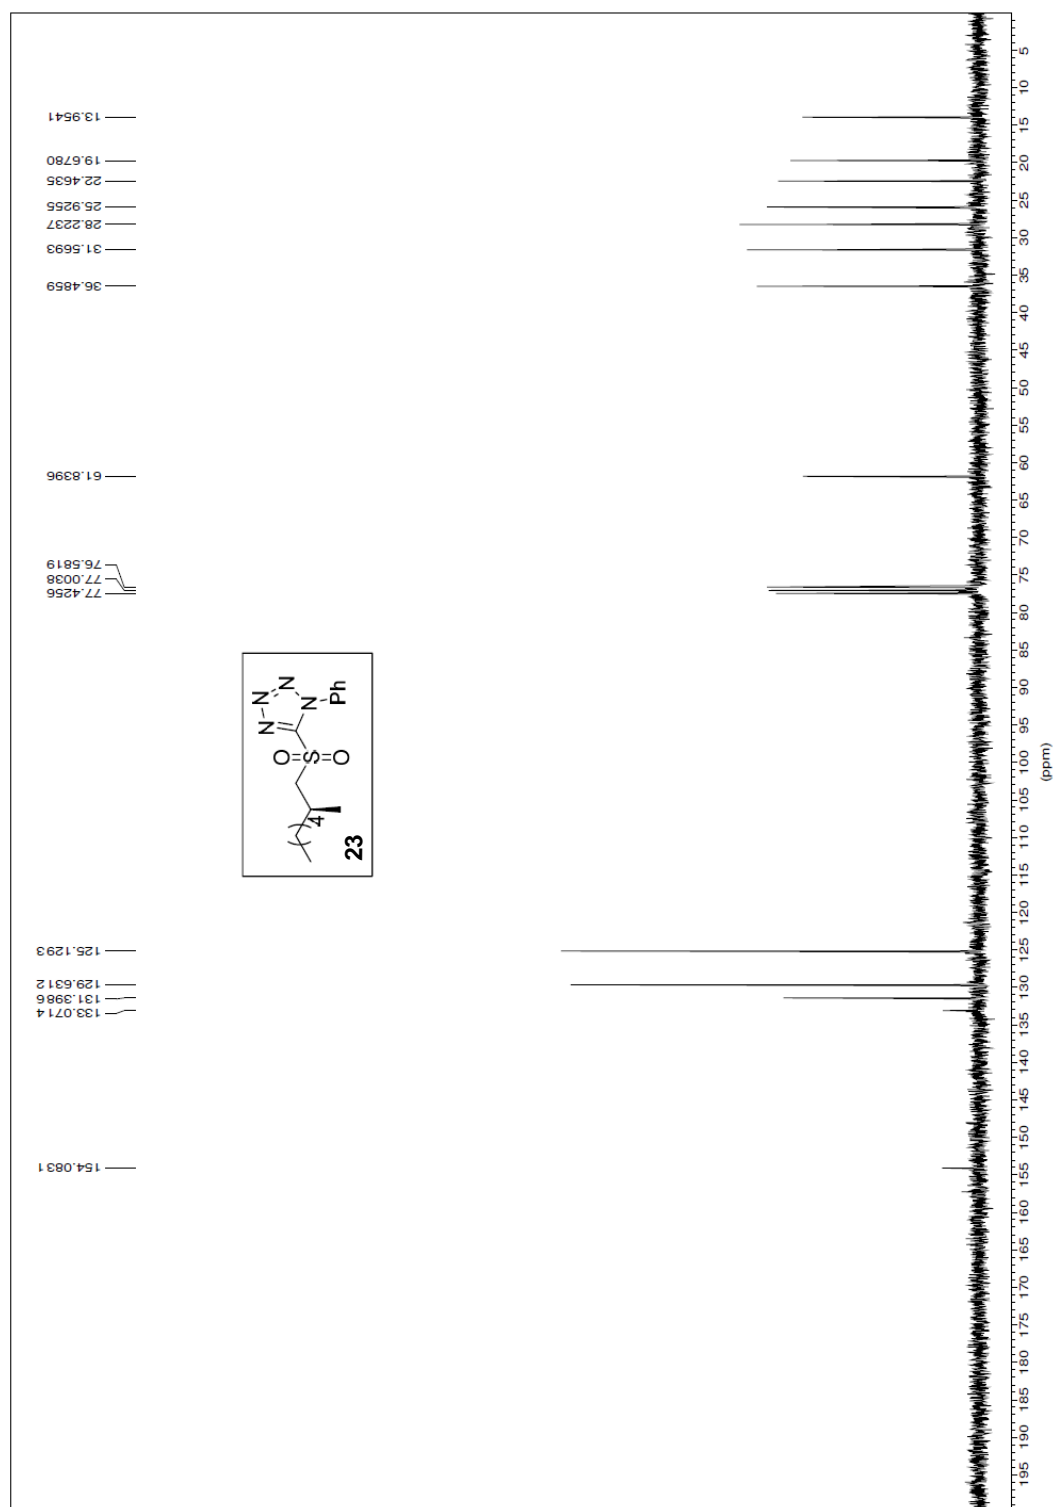

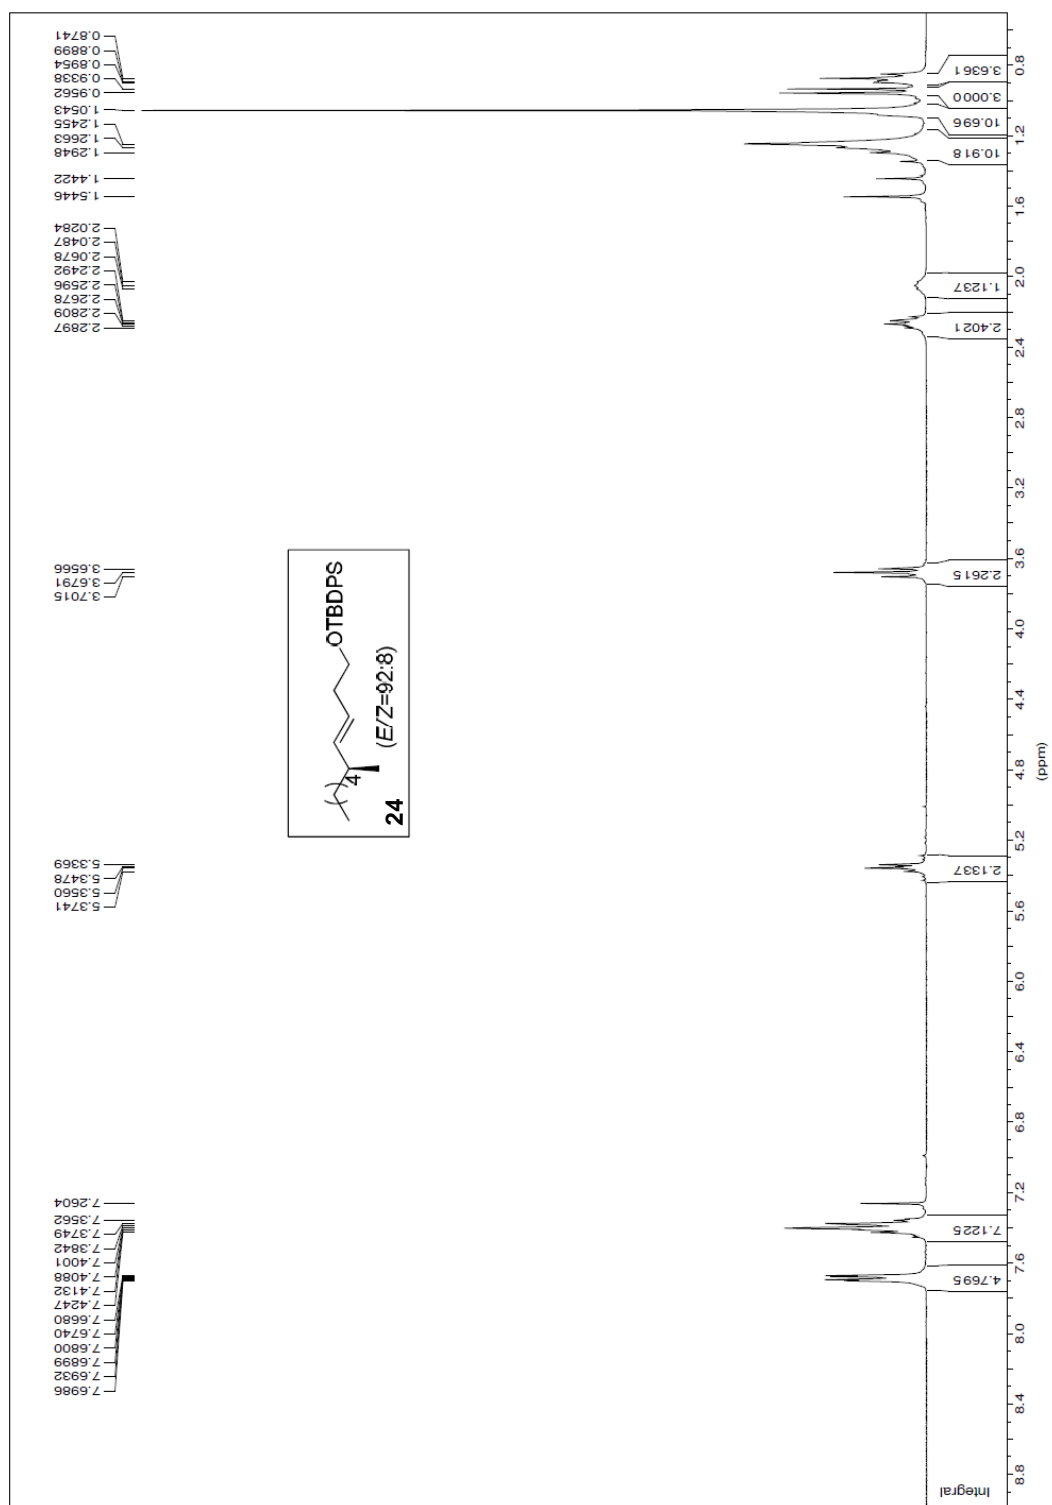

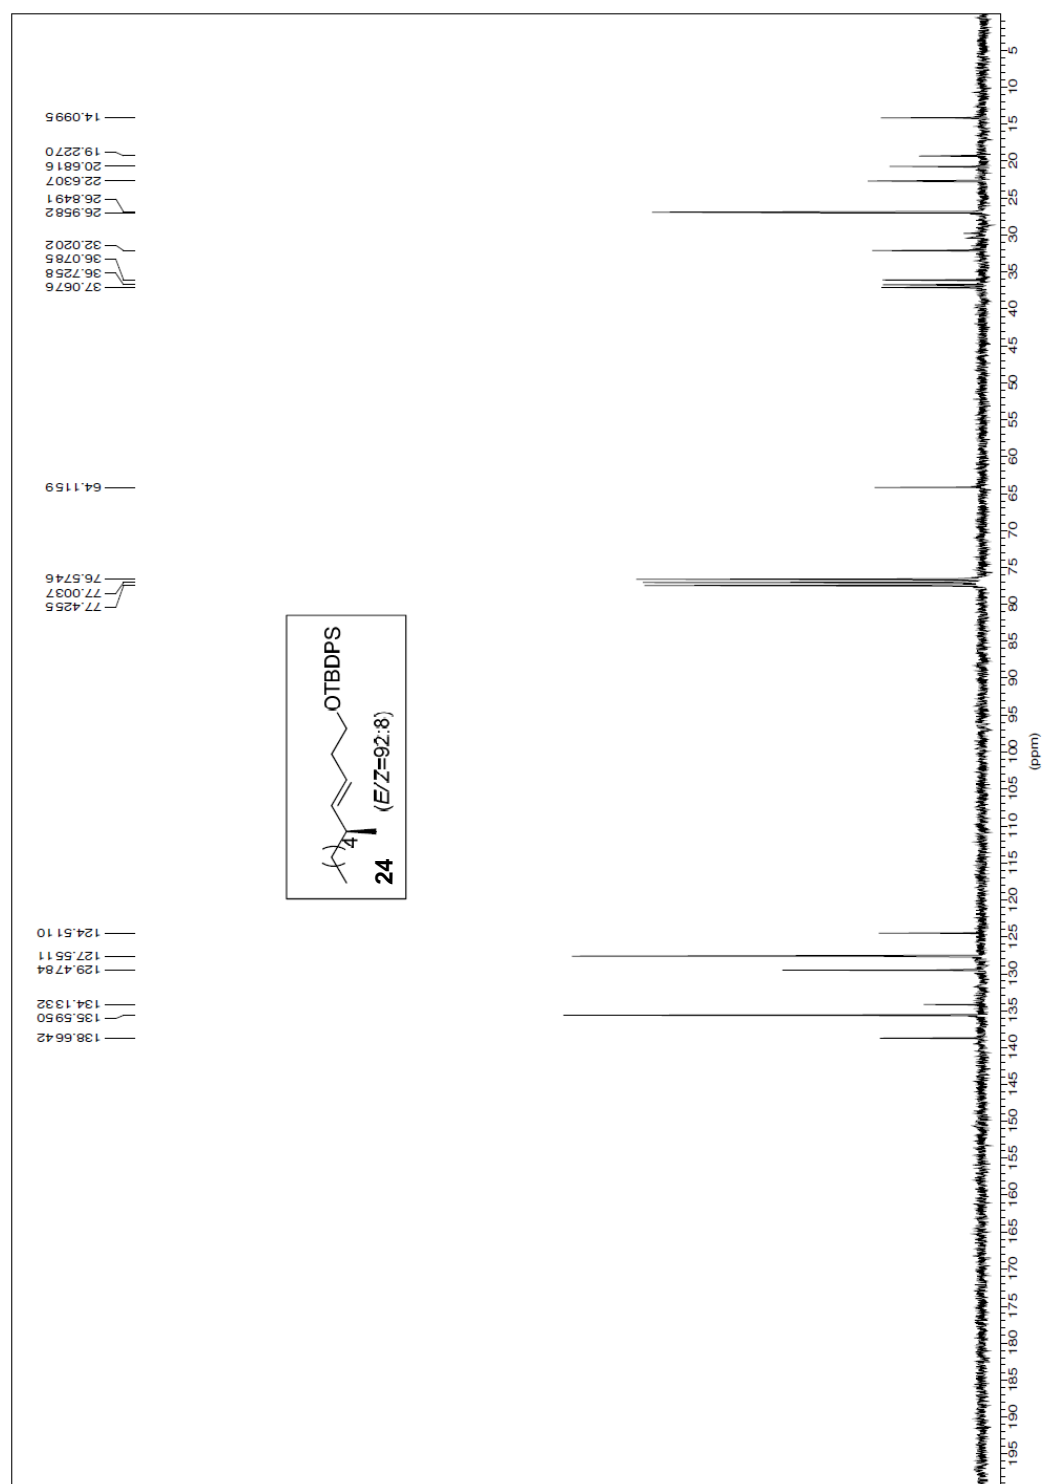

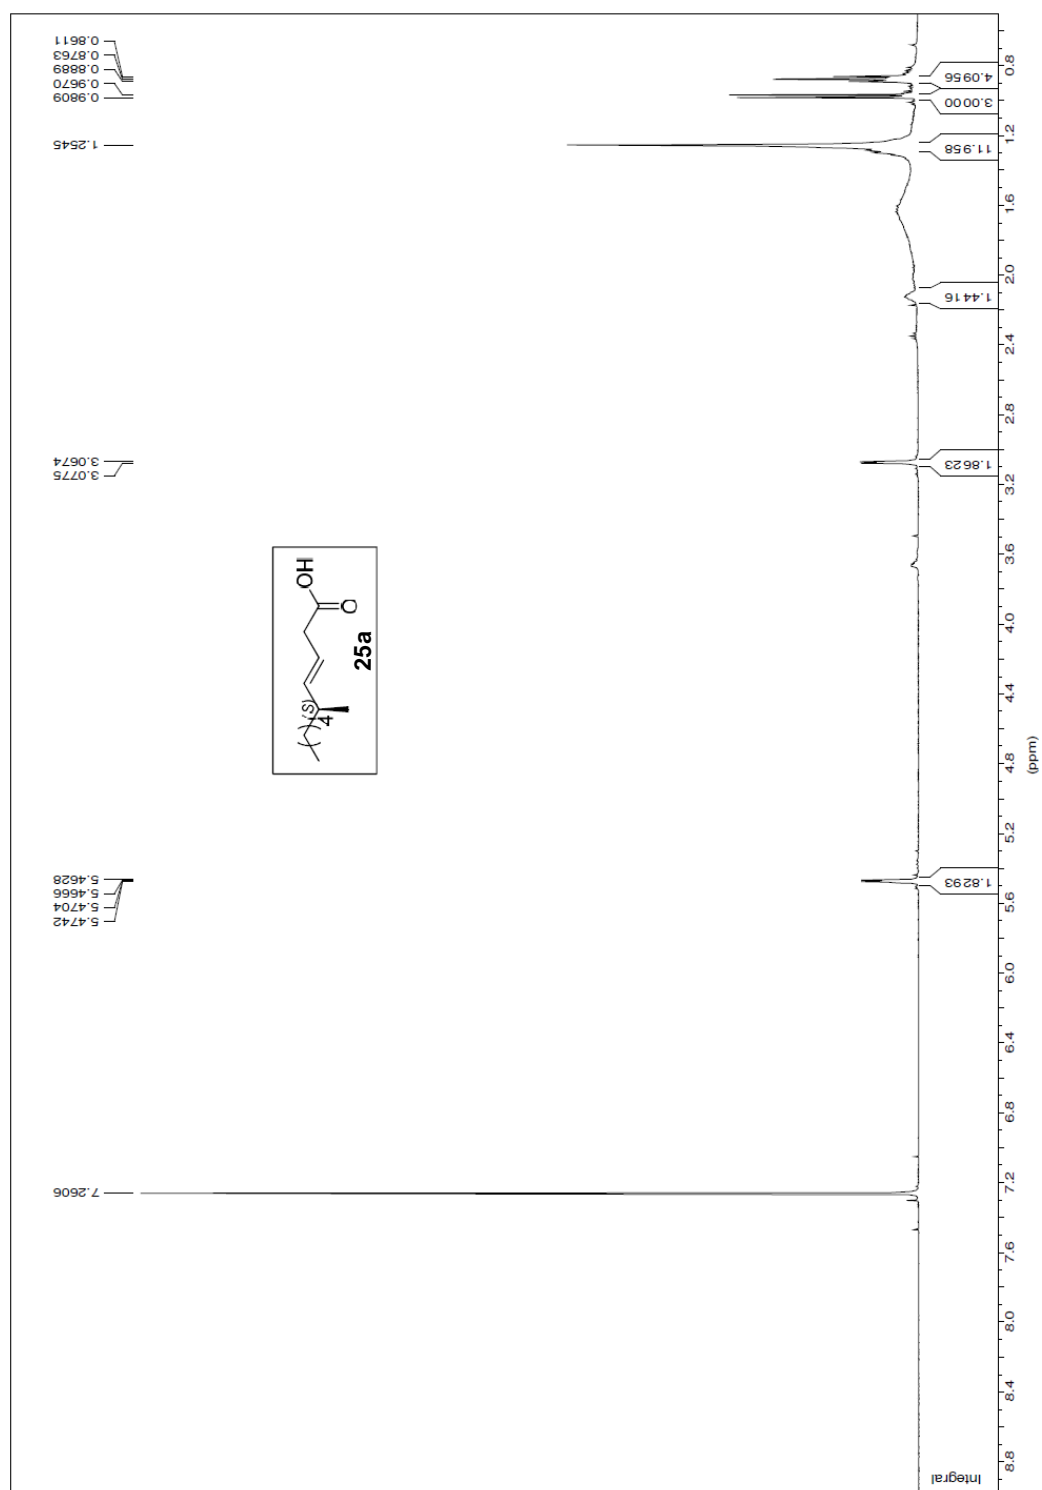

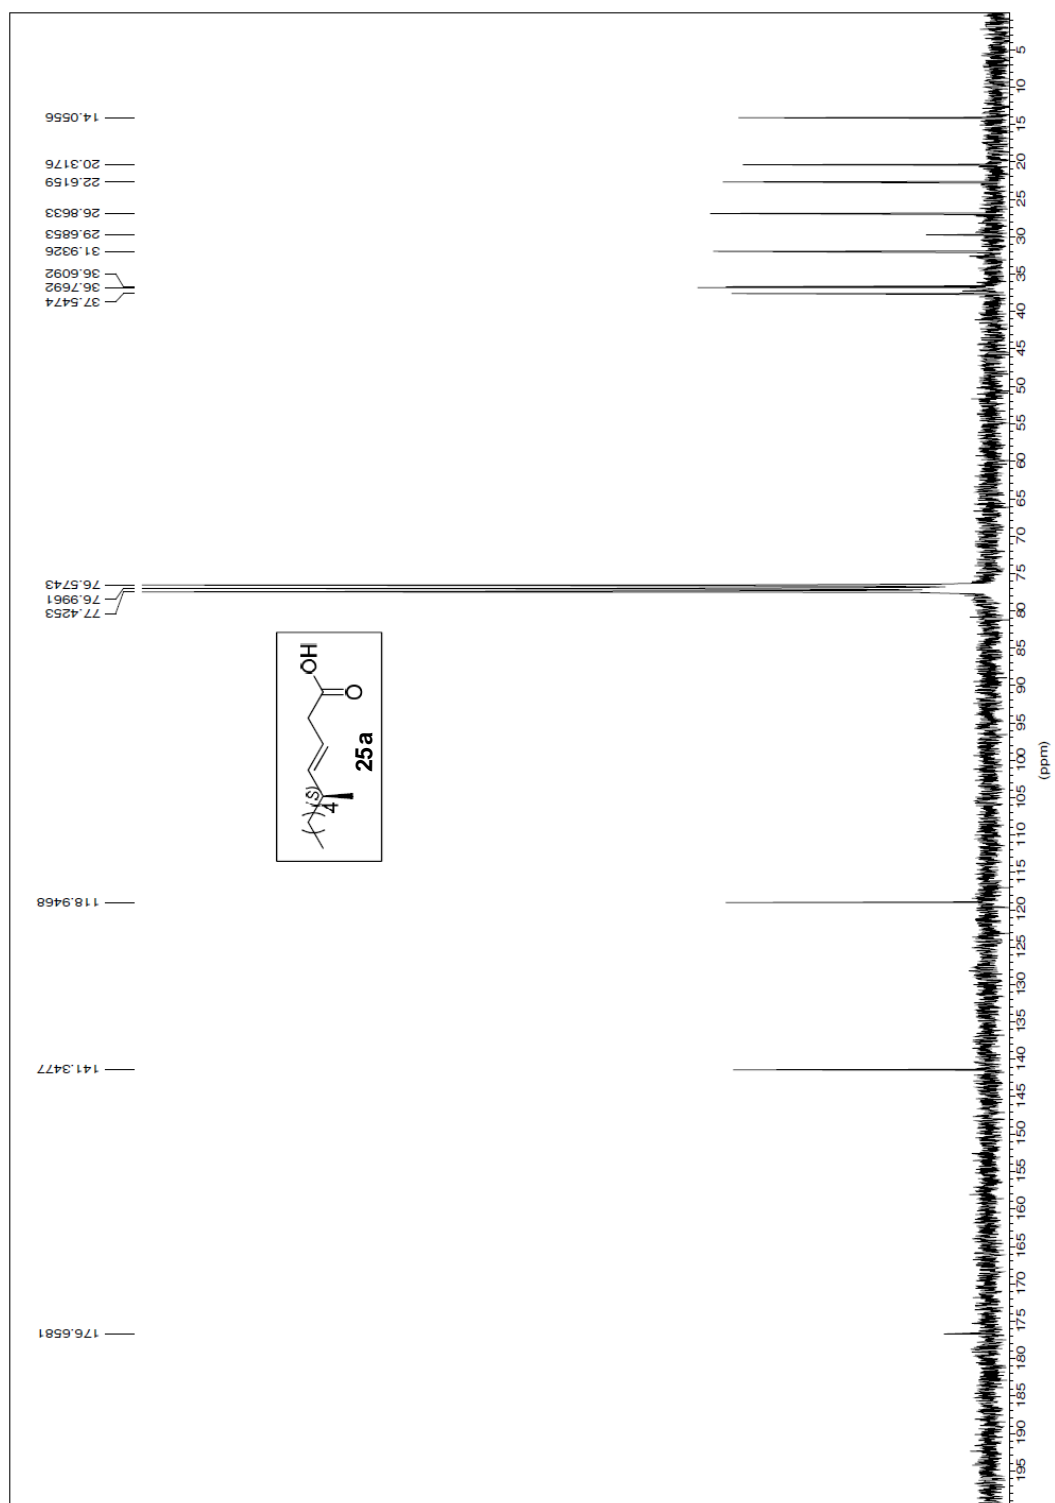

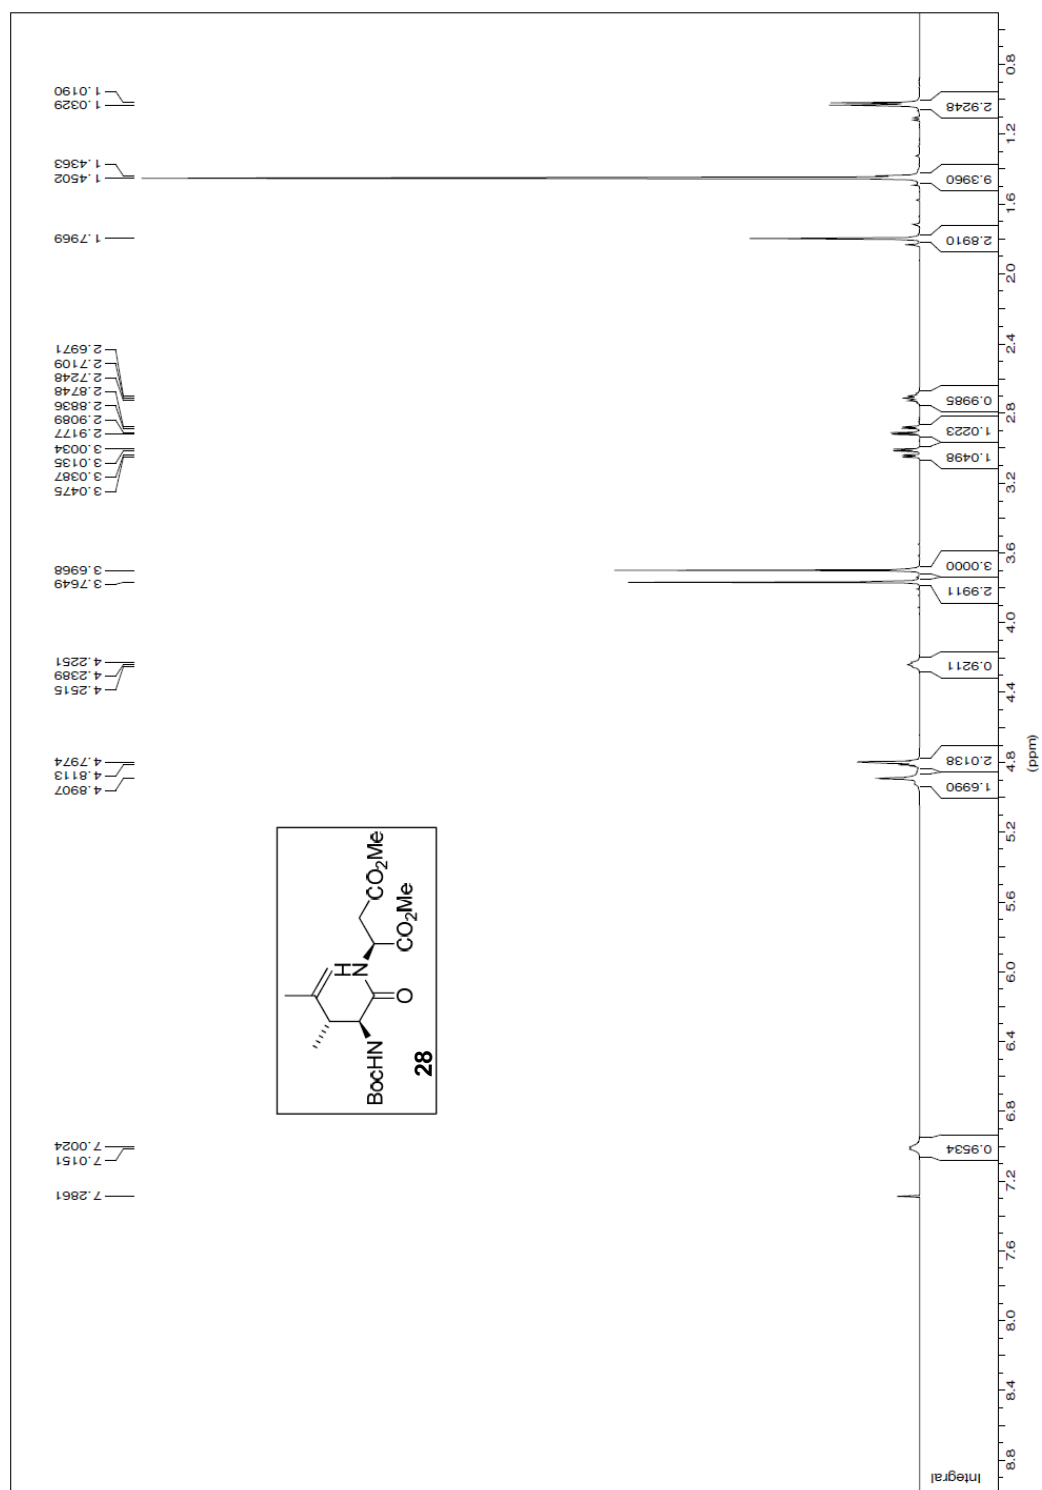

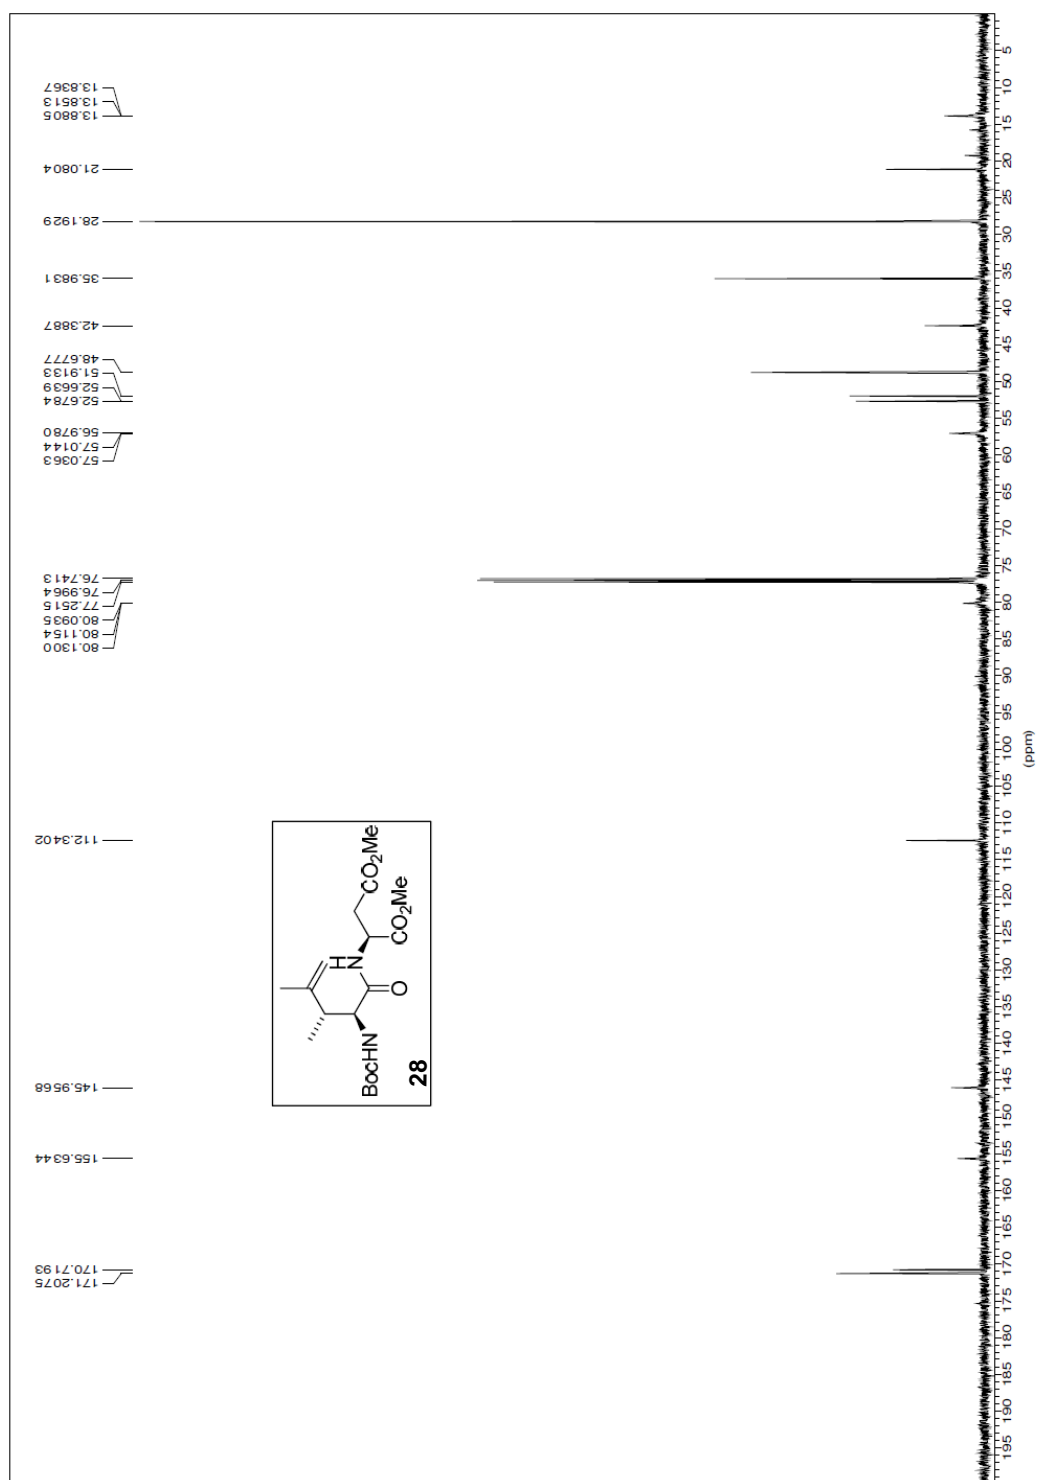

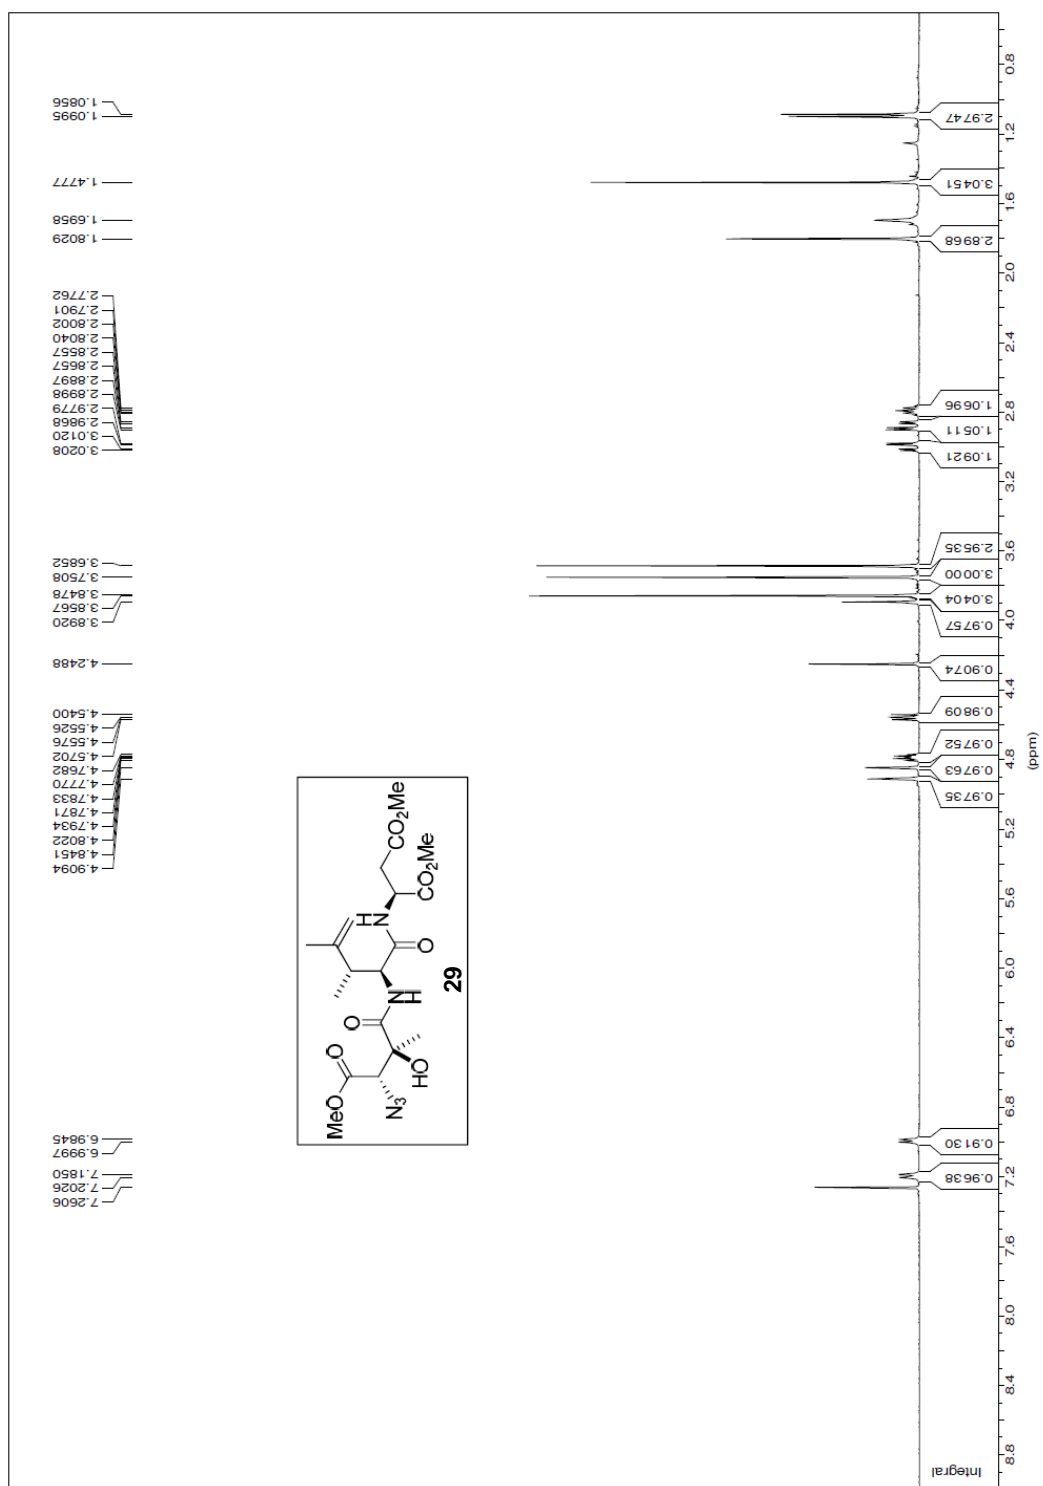



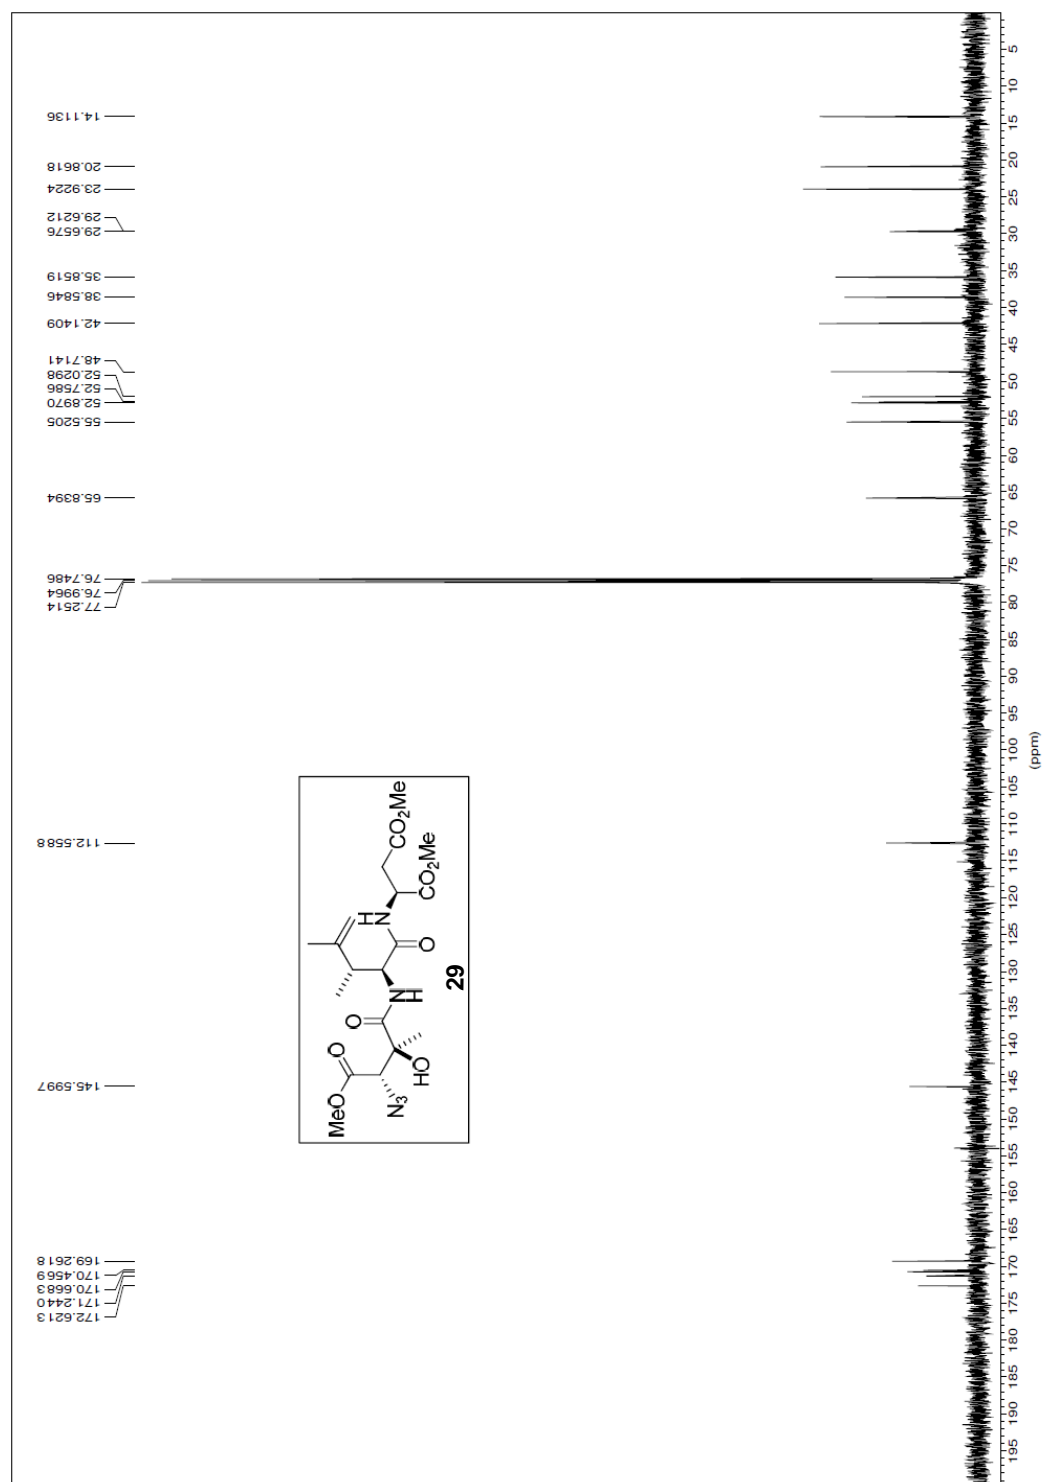

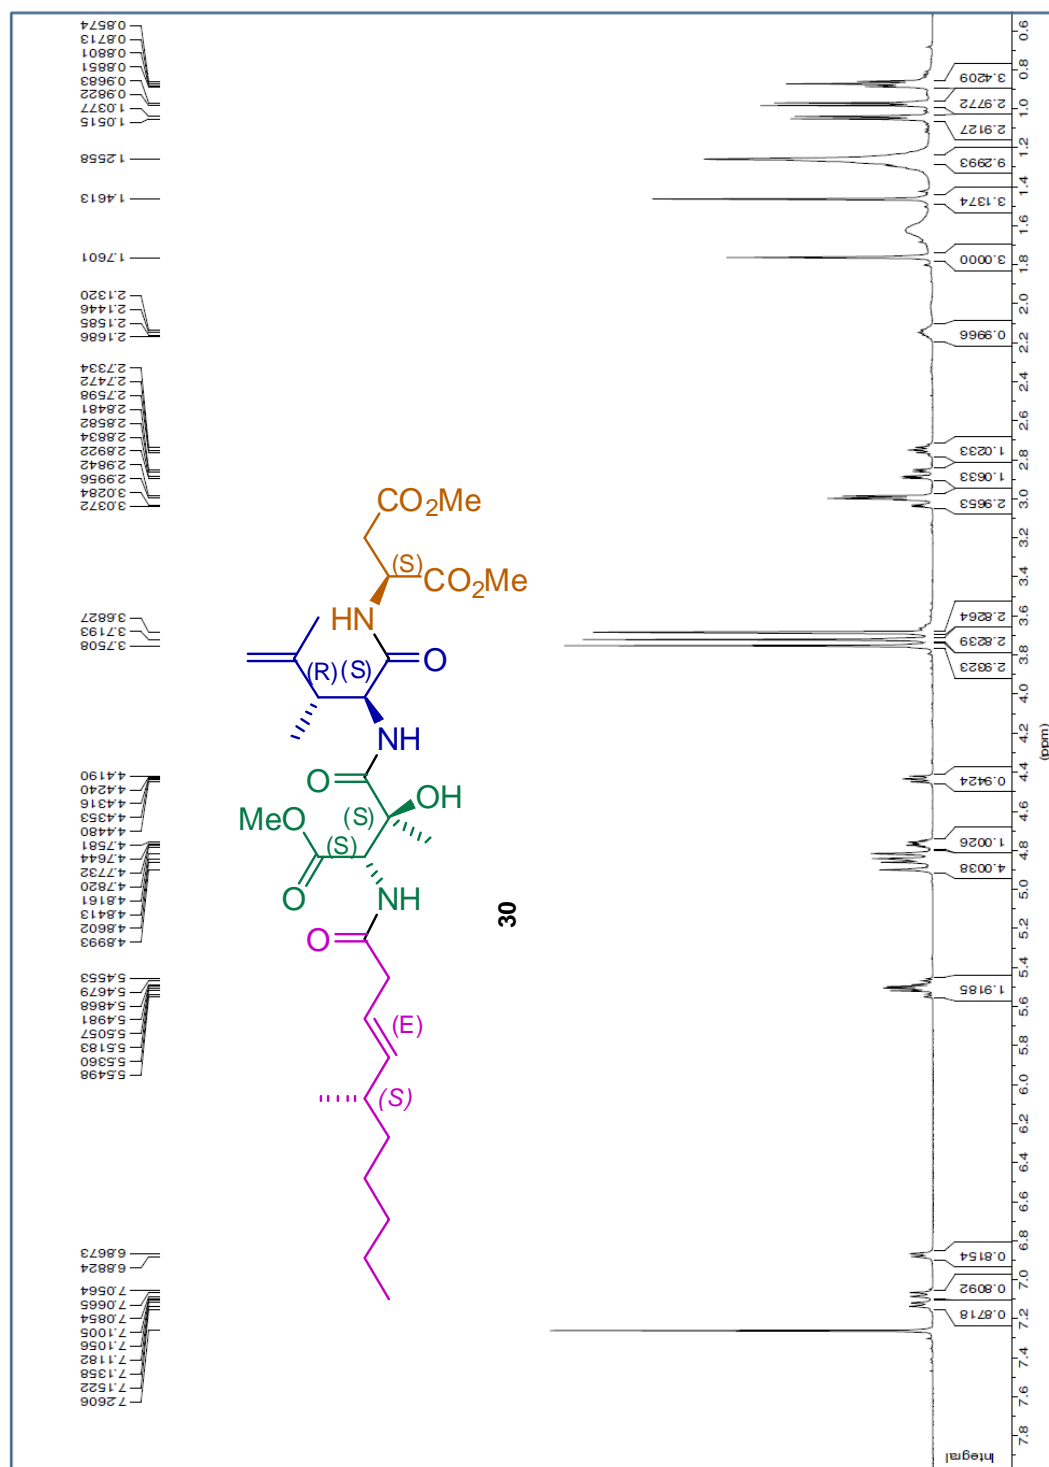

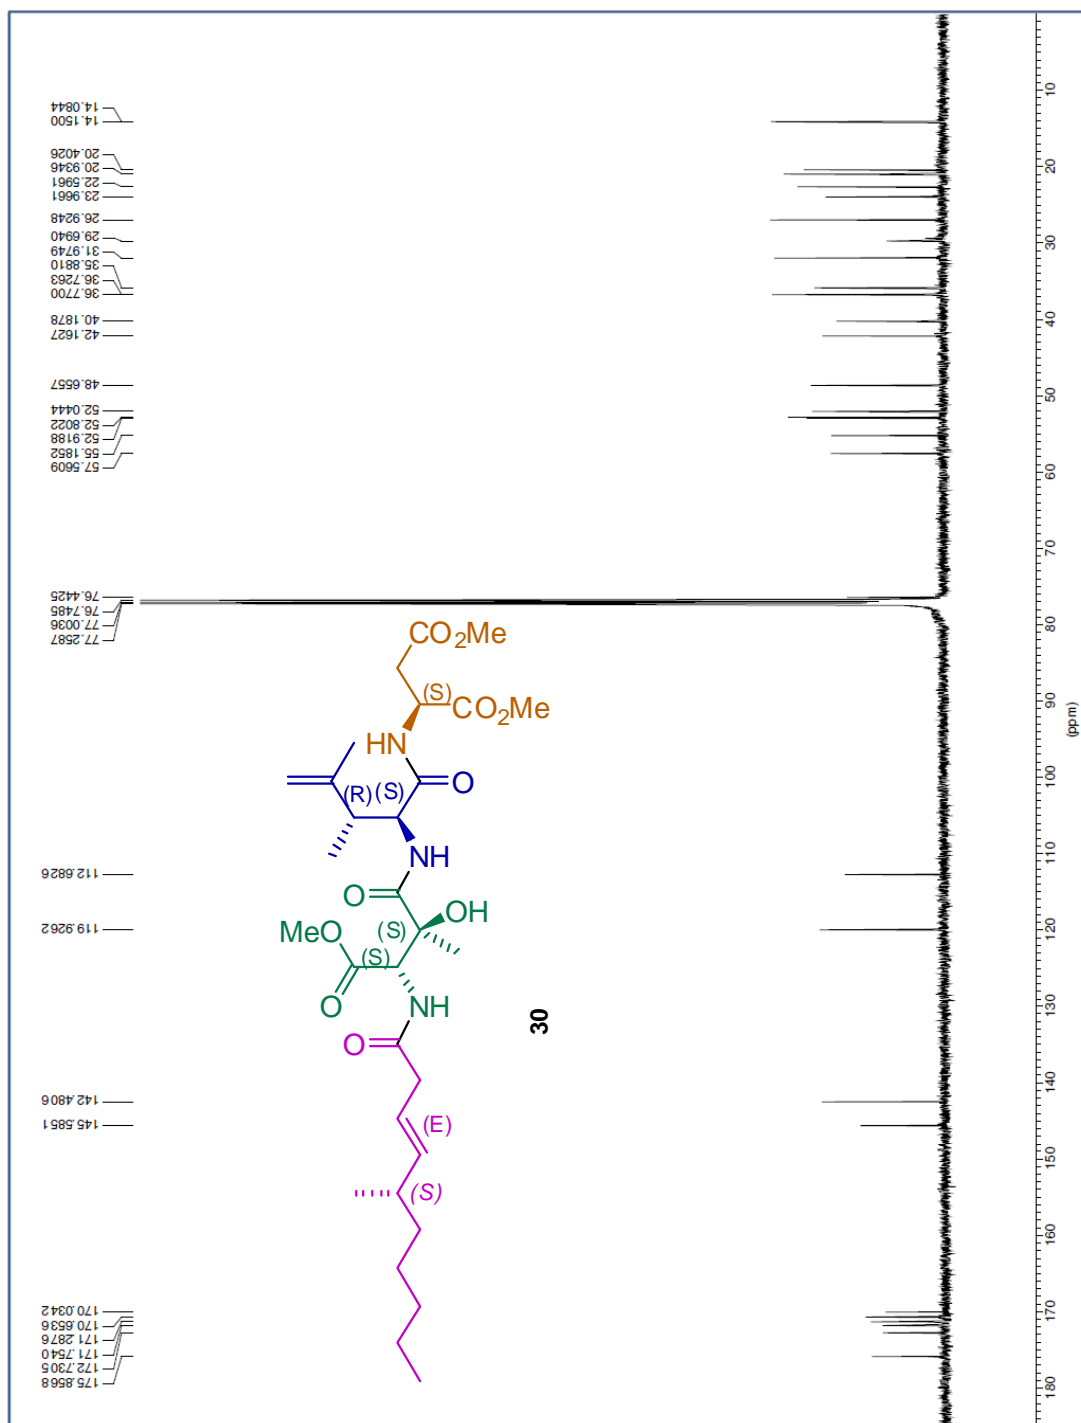

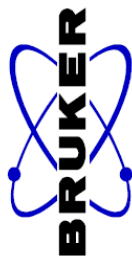

Current Data Parameters  
 NAME: ak91022  
 EXPNO: 2  
 PROCNO: 1

F2 - Acquisition Parameters  
 Date\_: 20101022  
 Time: 13.36

INSTRUM: spect  
 PULPROG: 5 mm TXI 1H-13  
 TD: 2048  
 SOLVENT: C6D6  
 NS: 16  
 DS: 8  
 SWH: 3822.630 Hz  
 FIDRES: 1.860311 Hz  
 AQ: 0.268092 sec  
 RG: 181  
 DW: 130.800 usec  
 DE: 6.00 usec  
 TE: 298.0 K

D0: 0.0000300 sec  
 D1: 1.0000000 sec  
 D13: 0.0000000 sec  
 D16: 0.0002000 sec  
 INO: 0.00026160 sec

===== CHANNEL f1 =====  
 NUC1: 1H  
 P0: 8.20 usec  
 F1: 9.20 usec  
 F11: 4.00 usec  
 SFO1: 500.2320434 MHz

===== GRADIENT CHANNEL =====  
 P16: 1500.00 usec

F1 - Acquisition parameters  
 ND0: 1  
 FIDRES: 500.232 MHz  
 FIDRES: 7.466074 Hz  
 SW: 7.642 ppm  
 FMODE: QF

F2 - Processing parameters  
 SI: 32  
 SF: 500.2300003 MHz  
 NPM: 0  
 SSB: 0  
 LB: 0.00 Hz  
 GB: 0  
 PC: 1.40

F1 - Processing parameters  
 SI: 32  
 SF: 500.2300003 MHz  
 NPM: 0  
 SSB: 0  
 LB: 0.00 Hz  
 GB: 0

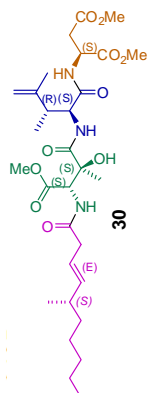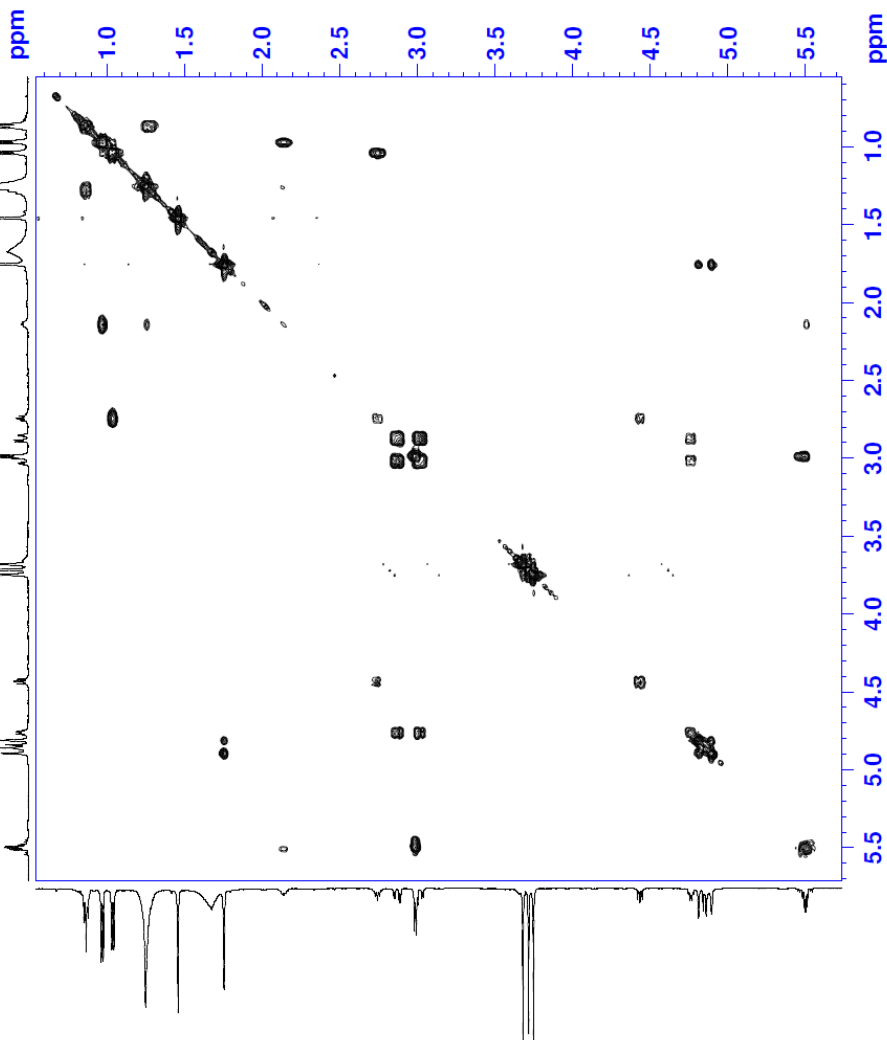

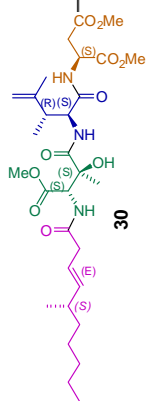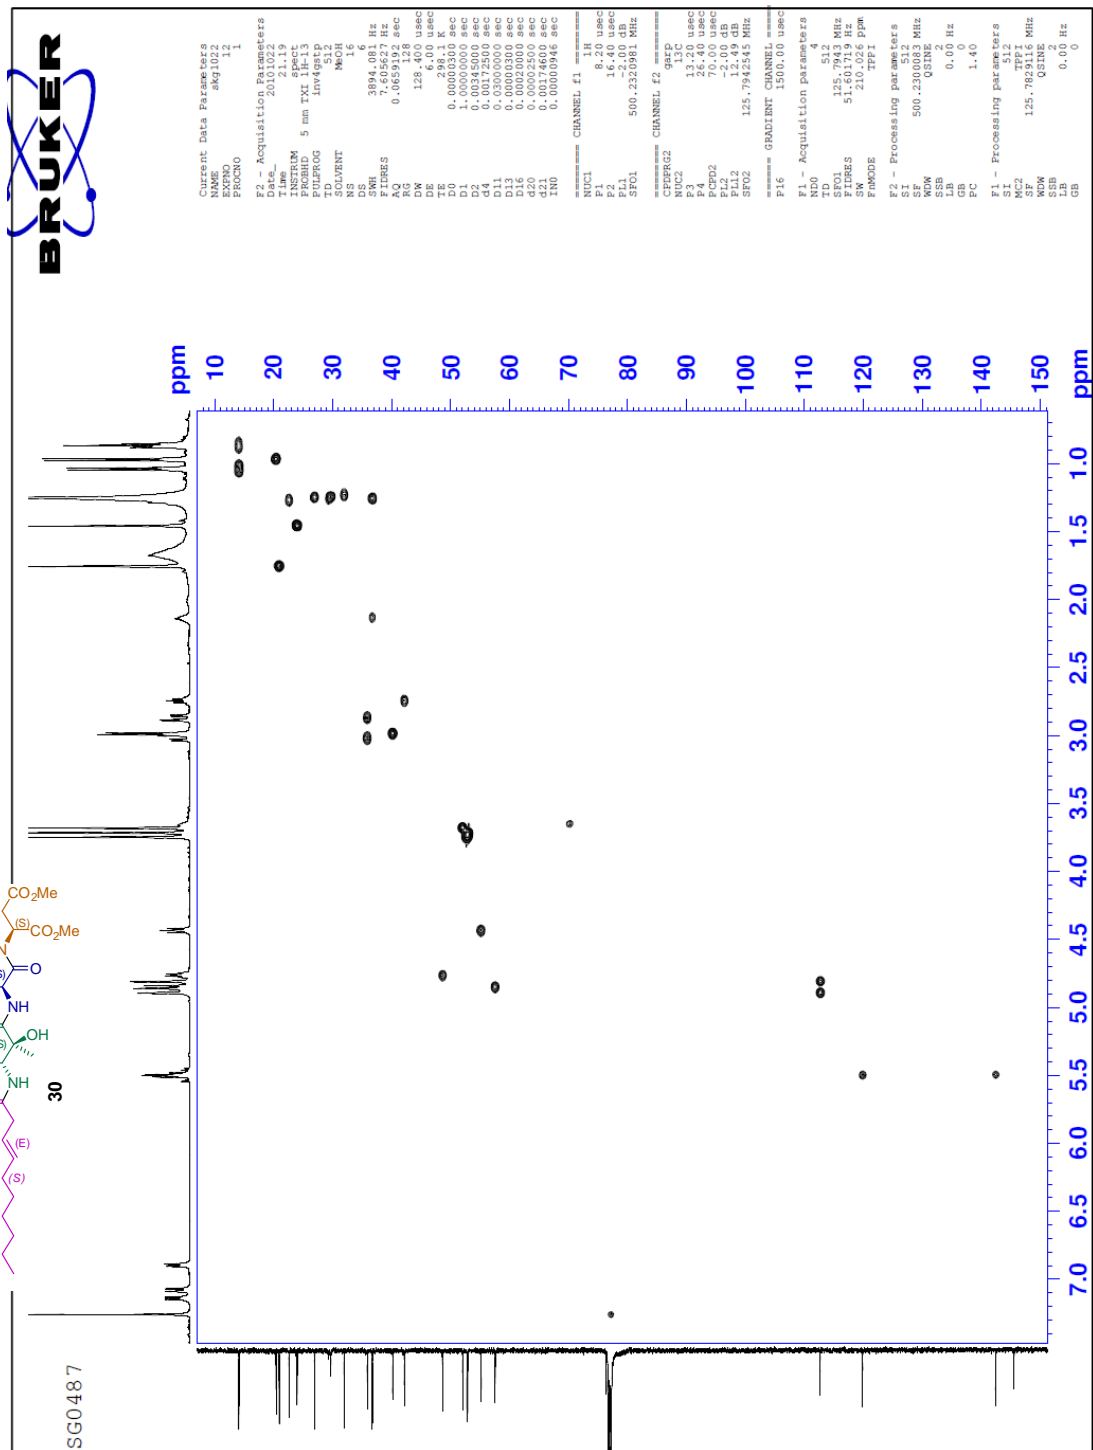

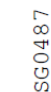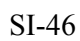

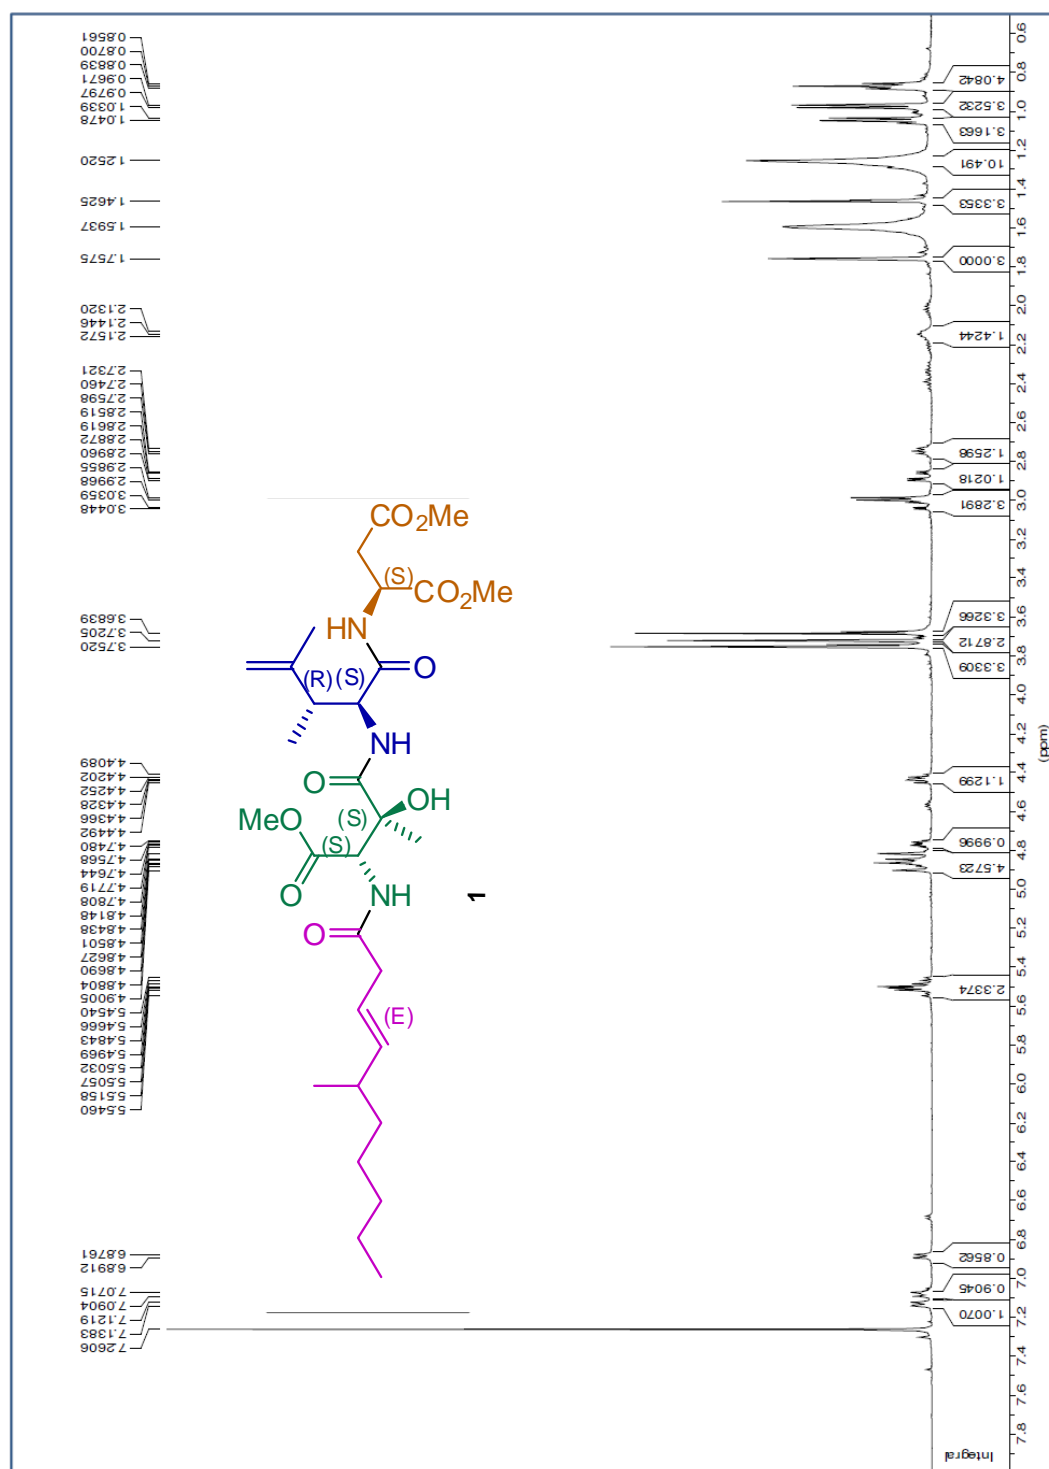

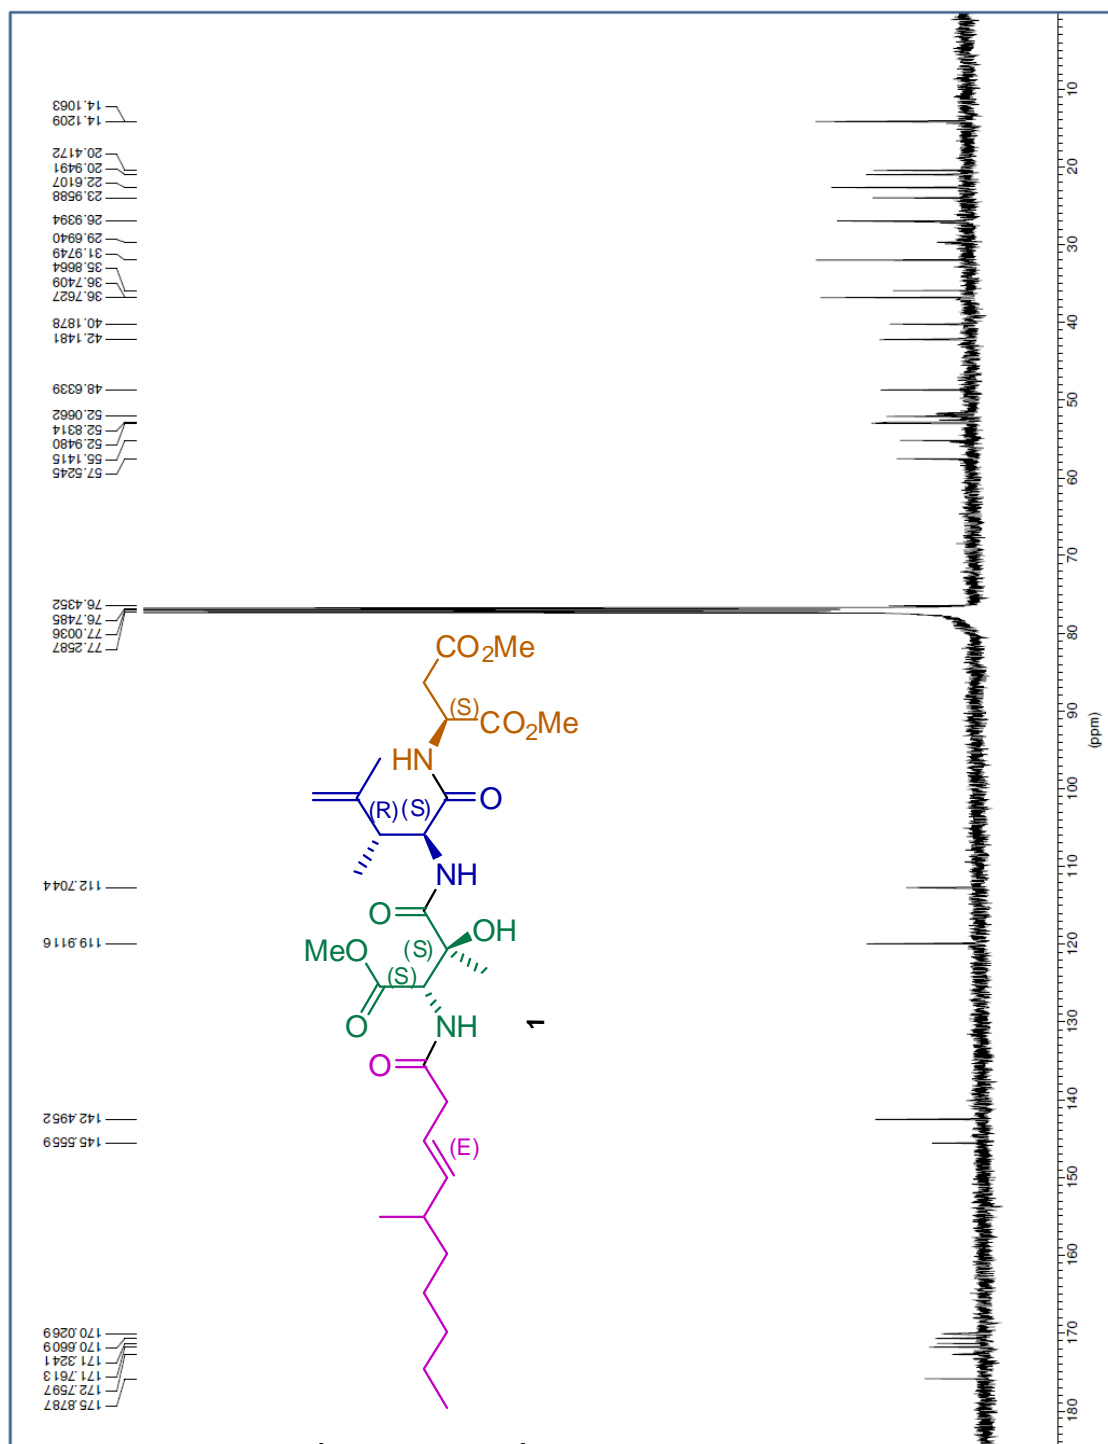





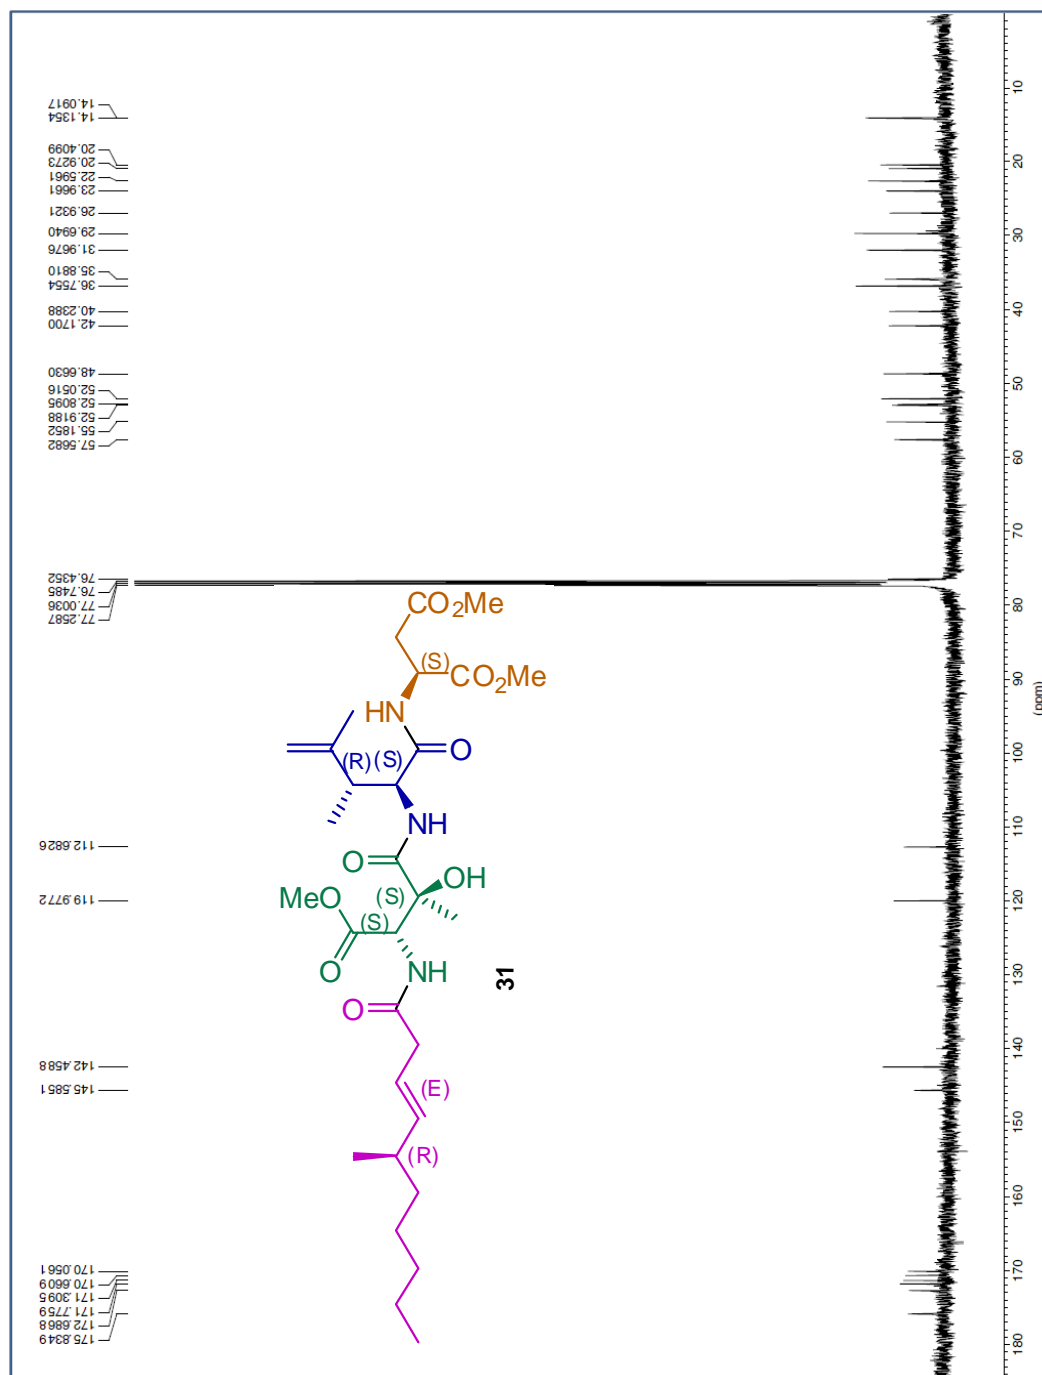

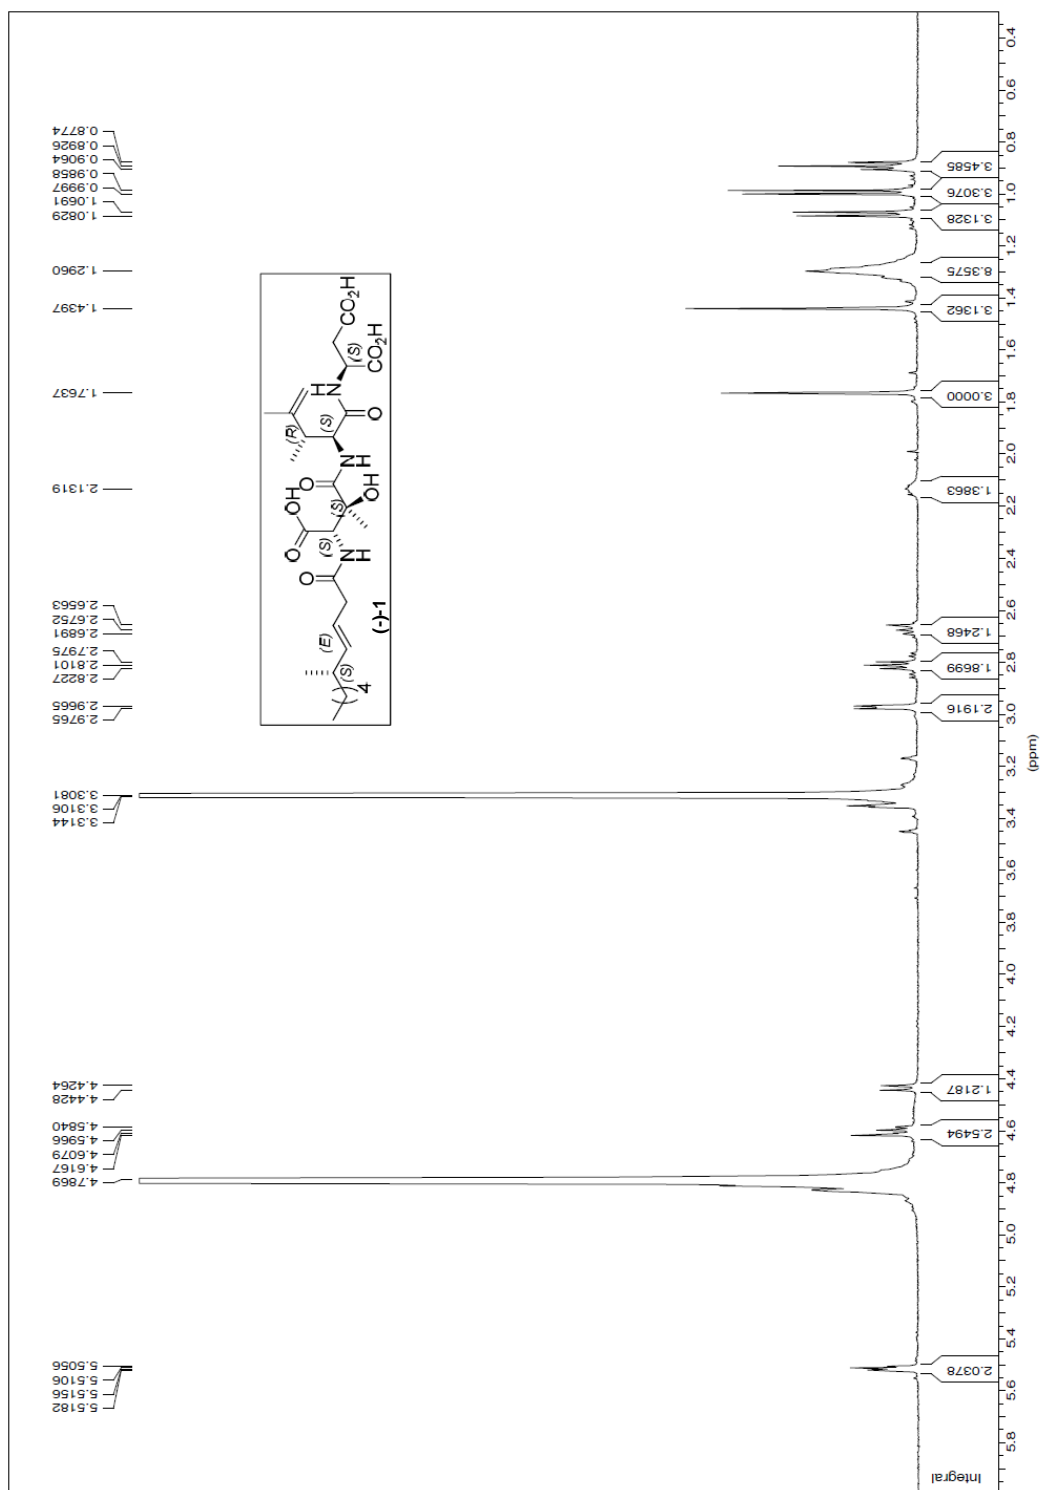

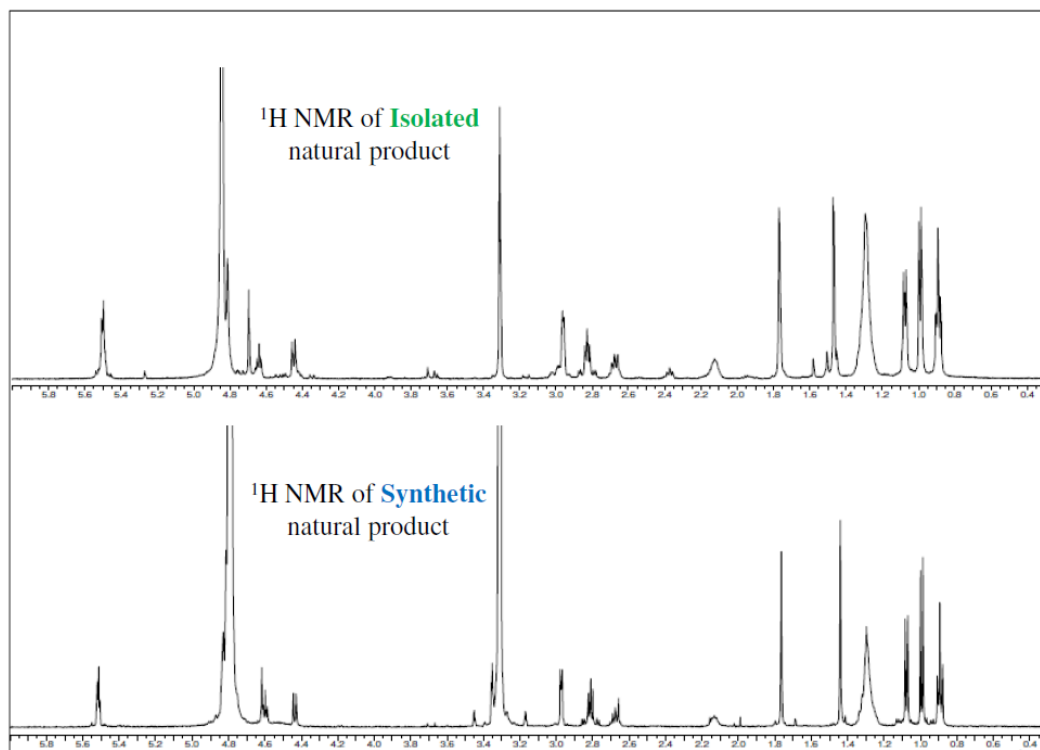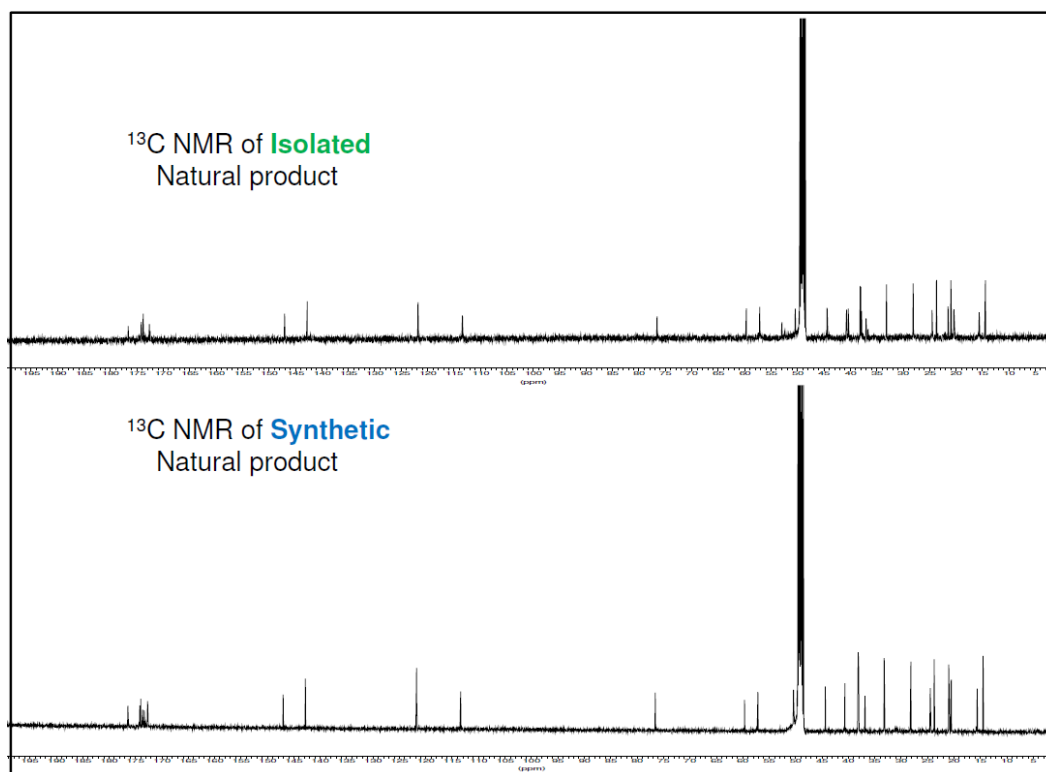

Supplement: Supplementary file 1 [file 4182910]
